# 1 **Microvesicles Transfer Mitochondria and Increase Mitochondrial** 2 **Function in Brain Endothelial Cells**

3  
4 Anisha D'Souza<sup>a</sup>, Amelia Burch<sup>b</sup>, Kandarp M. Dave<sup>a\*</sup>, Aravind Sreeram<sup>c\*</sup>, Michael J.  
5 Reynolds<sup>d</sup>, Duncan X. Dobbins<sup>a</sup>, Yashika S. Kamte<sup>a</sup>, Wanzhu Zhao<sup>a</sup>, Courtney Sabatelle<sup>a</sup>, Gina  
6 M. Joy<sup>a</sup>, Vishal Soman<sup>f</sup>, Uma R. Chandran<sup>f</sup>, Sruti S. Shiva<sup>d,e</sup>, Nidia Quillinan<sup>b</sup>, Paco S. Herson<sup>b1</sup>,  
7 and Devika S Manickam<sup>a†</sup>

8 \*These authors contributed equally

9  
10 <sup>a</sup>Graduate School of Pharmaceutical Sciences and School of Pharmacy, Duquesne University,  
11 Pittsburgh, PA, USA.

12  
13 <sup>b</sup>Department of Anesthesiology, School of Medicine, University of Colorado Anschutz Medical  
14 Campus, Aurora, CO, USA.

15  
16 <sup>c</sup>College of William & Mary, Williamsburg, VA, USA.

17  
18 <sup>d</sup>Heart, Lung, Blood Vascular Institute, University of Pittsburgh Medical School, PA, USA.

19  
20 <sup>e</sup>Department of Pharmacology & Chemical Biology, Pittsburgh Heart Lung Blood Vascular  
21 Institute, University of Pittsburgh Medical School, PA, USA.

22  
23 <sup>f</sup>Department of Biomedical Informatics, University of Pittsburgh Medical School, PA, USA.

24 <sup>1</sup>Current address: Cerebrovascular Research Institute, Neurosurgery, The Ohio State University  
25 School of Medicine, OH, USA.

26  
27 †Corresponding author:

28 Devika S Manickam, Ph.D.

29 600 Forbes Avenue, 453 Mellon Hall

30 Pittsburgh, PA 15282.

31 Email: [sundaramanickd@duq.edu](mailto:sundaramanickd@duq.edu), Twitter: [@manickam\\_lab](https://twitter.com/manickam_lab)

32 Phone: +1 (412) 396-4722, Fax +1 (412) 396-2501

33 *Running headline: EVs Increase Cellular Energetics and Mitochondrial Function*

34 **Keywords**

35 Extracellular vesicles, Microvesicles, [Exosomes](#), Mitochondrial transfer, [Mitochondrial function](#),  
36 [BBB protection](#), [Ischemic stroke](#)

37  
38 **Abstract**

39 We have demonstrated, for [the first time that microvesicles](#), a sub-type of extracellular  
40 [vesicles](#) (EVs) derived from hCMEC/D3: a human brain endothelial cell (BEC) line transfer  
41 polarized mitochondria to recipient BECs in culture and to neurons in mice acute brain cortical  
42 and hippocampal slices. This mitochondrial transfer increased ATP levels by 100 to 200-fold  
43 (relative to untreated cells) in the recipient BECs exposed to oxygen-glucose deprivation, an *in*  
44 *vitro* model of cerebral ischemia. [We have also demonstrated that transfer of microvesicles, the](#)  
45 [larger EV fraction, but not exosomes resulted in increased mitochondrial function in hypoxic](#)  
46 [endothelial cultures. Gene ontology and pathway enrichment analysis of EVs revealed a very](#)  
47 [high association to glycolysis-related processes.](#) In comparison to heterotypic macrophage-  
48 derived EVs, BEC-derived EVs demonstrated a greater selectivity to transfer mitochondria and  
49 increase endothelial cell survival under ischemic conditions.

50  
51 **Highlights**

- 52 • [Microvesicles](#) transfer mitochondria to endothelial cells and [brain slice neurons](#)
- 53 • Mitochondrial transfer increased ATP in ischemic brain endothelial cells (BECs)
- 54 • [Transfer of microvesicles increased mitochondrial function in hypoxic BECs](#)
- 55 • [Transfer of exosomes did not affect mitochondrial function in hypoxic BECs](#)

- 56 • Homotypic BEC-derived EVs result in greater ATP levels in the recipient BECs

57

## 58 1. Introduction

59 The documented roles of cell-secreted extracellular vesicles (EVs) in intercellular  
60 communication via the transfer of their innate cargo make them attractive drug delivery carriers  
61 [1-11]. The subtypes of EVs vary in particle diameters, among other factors, with the larger, 100-  
62 1000 nm microvesicles (MVs), and the smaller, 50 – 150 nm exosomes (EXOs) being secreted  
63 via different biogenesis pathways [1, 6-8, 12-14]. The lower immunogenicity of EVs, their  
64 increased stability in systemic circulation [15-19] and their ability to cross biological barriers  
65 make them attractive candidates for the delivery of biologics like nucleic acids and proteins [20-  
66 22]. Kanada *et al.* loaded plasmid DNA [23] and minicircle DNA [24] in EVs. They reported  
67 that MVs were a suitable carrier for pDNA as the EXOs failed to show the gene expression in the  
68 recipient HEK293 cells [23]. Lamichhane *et al.* also loaded DNA into EVs via electroporation  
69 and found that the loading efficiency of DNA constructs are dependent upon the size of DNA.  
70 Plasmid DNA and linear DNA greater than 1000 bp could not be loaded in EVs with a reported  
71 upper loading limit of 5 µg of linear 250 bp dsDNA. Nevertheless, the loading efficiency of  
72 DNA was limited at 0.2 %, with poor transfection outcomes [25].

73

74 We speculated that brain endothelial cell-derived EVs may express a natural affinity to brain  
75 endothelial cells and therefore we engineered EVs derived from hCMEC/D3, a human brain  
76 endothelial cell line, for the delivery of a model plasmid DNA. Following an ischemic insult, the  
77 inflammatory response to injury is triggered by the infiltration of peripheral immune cells across  
78 the blood-brain barrier. Yuan *et al.* [21] demonstrated that naïve EVs derived from RAW 264.7

79 macrophages utilize the integrin lymphocyte function-associated antigen 1, intercellular adhesion  
80 molecule 1, and the carbohydrate-binding C-type lectin receptors, to interact with hCMEC/D3  
81 monolayers. Therefore, we also tested EVs derived from a macrophage cell line, RAW 264.7, as  
82 a delivery carrier. In our previous study, we demonstrated that macrophage-derived EVs  
83 demonstrated increased luciferase transgene expression in the recipient brain endothelial cells  
84 (BECs) compared to the homotypic EVs isolated from brain endothelial cells. More interestingly,  
85 EXOs, the smaller EV fraction, showed a greater DNA loading and transfection in the recipient  
86 BECs compared to the larger MVs [26]. The above results on EXO vs. MV-mediated DNA  
87 transfection were in direct contrast to previous observations reported by Kanada *et al.* [23] albeit  
88 their study used a different cell line (HEK293). To rule out operator-induced systematic biases in  
89 the transfection of the parent BECs using pDNA, procedures pertaining to the isolation of DNA-  
90 loaded EVs, and transfection of the recipient cells were repeated from our previous studies by an  
91 independent operator to determine the DNA delivery potential of BEC- vs. macrophage-derived  
92 EVs. We also compared BEC- and RAW-derived EVs using gene ontology and pathway  
93 enrichment analysis to understand potential differences in their composition.

94  
95 The presence of a rich, innate biomolecular cargo in EVs can be exploited for  
96 additive/synergistic therapeutic effects depending on the drug cargo that is packaged in these  
97 vesicles. Specifically, EVs are reported to contain mitochondria, mitochondrial proteins, or  
98 mitochondrial DNA that can be transferred from the parent/donor to recipient cells [27]. Transfer  
99 of intact mitochondria via EVs to the recipient cells has been reported, especially during stress  
100 and injury [27] and the transferred mitochondria localize within the recipient's mitochondrial  
101 network [28], resulting in increased cellular ATP levels [29]. Depleted oxygen and nutrient

102 supply decrease the overall cellular energy (ATP) levels and further generate reactive oxygen  
103 species resulting in mitochondrial dysfunction, decreased cell viability and trigger apoptotic  
104 endothelial and neuronal death [during ischemic stroke](#) [20, 30]. We sought to harness the innate  
105 EV mitochondrial load to increase cellular energetics in ischemic endothelial cells as a potent  
106 strategy to protect the blood-brain barrier (BBB), increase its cellular energetics and limit BBB-  
107 induced dysfunction post-stroke. We studied the effects of naïve EVs (EXOs and MVs) isolated  
108 from a brain endothelial- and macrophage cell lines on the resulting ATP levels in recipient BEC  
109 exposed to oxygen-glucose-deprived conditions, mimicking ischemic stroke-like conditions *in*  
110 *vitro*. We demonstrated the feasibility of EVs to deliver ATP5A, an exogenous mitochondrial  
111 protein, to increase ATP levels in ischemic endothelial cells. Further, we also investigated if EVs  
112 can transfer active and functional (polarized) mitochondria to the recipient BECs [and the effects](#)  
113 [of this transfer on mitochondrial function](#).

114

115 [We have demonstrated selective differences in the nature of EV-mediated mitochondrial](#)  
116 [transfer. Transfer of mitochondria via microvesicles, the larger EV fraction, resulted in increased](#)  
117 [mitochondrial function whereas exosome-mediated transfer did not affect mitochondrial](#)  
118 [function](#). We have also demonstrated, for the [first](#) time, that BEC-derived [microvesicles \(the](#)  
119 [larger EV fraction\)](#) transfer functional, polarized mitochondria to endothelial cells in culture and  
120 [neurons in](#) mice acute brain cortical and hippocampal slices. The presented results are of high  
121 significance as they demonstrate evidence for the potential of BEC-derived EVs to increase  
122 endothelial cell survival under ischemic conditions. Secondly, the capability of [MV](#)s to transfer  
123 polarized mitochondria to endothelial- and neuronal cells in the brain slices have important  
124 implications in the context of ischemic protection.

125

## 126 **2. Experimental section**

### 127 **2.1. Materials**

128 Reporter plasmid DNA constructs encoding the firefly luciferase gene (gWIZ-Luc/Luc-  
129 pDNA, 6732 bp) and enhanced green fluorescent protein (gWiz-GFP/GFP-pDNA, 5757 bp)  
130 were purchased from Aldevron (Fargo, ND). The stock solutions of pDNA were diluted in 10  
131 mM Tris-HCl containing 1 mM EDTA (pH 7.4) to obtain a concentration of 1 mg/mL. The  
132 concentration and purity of the diluted solutions were confirmed by measuring  $A_{260}/A_{280}$  on a  
133 NanoDrop 1000 spectrophotometer (Thermo Scientific, USA). Recombinant Human Adenosine  
134 triphosphate synthase subunit alpha (ATP5A)-Glutathione S-transferase (GST) (N-term) full-  
135 length recombinant protein was obtained from Novus Biologicals Inc. (Littleton, CO).

136

137 Lipofectamine 3000 Reagent kit was purchased from Invitrogen (Carlsbad, CA). Beetle  
138 luciferin (potassium salt), and luciferase cell culture lysis 5x reagent were purchased from  
139 Promega (Madison, WI). Bovine lung aprotinin was purchased from Fisher Bioreagents (New  
140 Zealand). Sodium dodecyl sulfate (SDS), Tris-HCl, Tris-base, glycine, methanol, Tween-20,  
141 magnesium chloride, ethylenediaminetetraacetic acid disodium salt dihydrate, dithiothreitol, and  
142 glacial acetic acid were purchased from Fisher Scientific (Pittsburgh, PA). N,N,N',N'-  
143 tetramethyl ethylenediamine and glycyglycine were purchased from Acros Organics (New  
144 Jersey, USA). Protogel 30% acrylamide: 0.8% (w/v) bis-acrylamide stock solution was obtained  
145 from National Diagnostics, Atlanta, GA. Adenosine-5'-triphosphate disodium salt hydrate and  
146 coenzyme A trilithium salt dihydrate were procured from MP Biomedicals, LLC (Illkirch,  
147 France). MitoTracker Deep Red FM and DMSO were purchased from Life Technologies,

148 (Carlsbad, CA). Calcein-AM was purchased from BD Pharmingen BD Biosciences (San Jose,  
149 CA). Branched polyethyleneimine (PEI, molecular mass ~ 25 kD) was purchased from Sigma-  
150 Aldrich, Saint Louis, MO. [Chemicals used in the Seahorse experiments were purchased from](#)  
151 [Sigma-Aldrich \(St. Louis, MO\)](#). All other chemicals used were of analytical or cell culture grade  
152 and were used as received from the manufacturers.

153

154 **Kits.** Pierce Bicinchoninic acid (BCA) and MicroBCA protein assay kits were purchased  
155 from Thermo Scientific (Rockford, IL). Quant-iT PicoGreen dsDNA assay kit was procured  
156 from Molecular Probes, Inc. (Eugene, OR). CellTiter-Glo-luminescent viability assay reagent  
157 was procured from Promega (Madison, WI).

158

159 **Antibodies.** Primary mouse antibody to ATP5A (MW 53 kD) (Catalog #ab14748) and rabbit  
160 GAPDH polyclonal antibody (MW 36 kD) (Catalog #ab8245) were purchased from Abcam  
161 (Cambridge, MA). Alexa Fluor 790-conjugated AffiniPure Donkey Anti Mouse IgG (H+L) was  
162 purchased from Jackson ImmunoResearch Lab Inc. (West Grove, PA).

163

## 164 **2.2. Cell lines and culture**

165 Immortalized human cerebral microvascular endothelial cell line (hCMEC/D3) was  
166 purchased from Cedarlane Laboratories, Burlington, Ontario, Canada (Lot #Ix 102114.3C-P25).  
167 Mouse macrophage cells (ATCC TIB-71, RAW 264.7, *Mus musculus*) were purchased from  
168 ATCC (Manassas, VA).

169

170 hCMEC/D3 cells were cultured on well plates or tissue culture flasks pre-coated with 150  
171  $\mu\text{g}/\text{mL}$  of collagen (Type 1 Rat collagen fibrillar collagen, 90%, Corning, Discovery Labware  
172 Inc., Bedford, MA) diluted in 0.02 N acetic acid. The collagen solution was applied to the tissue  
173 culture flasks or well plates and the culture ware was incubated for 1 h at 37 °C in a humidified  
174 incubator. After 1 h, the collagen solution was removed and the surfaces were rinsed with sterile  
175 PBS (1x, 0.067 M, HyClone, Logan, UT). The hCMEC/D3 cells were cultured in complete  
176 media composed of endothelial cell basal medium-2 (Lonza Walkersville Inc., MD),  
177 supplemented with 5% heat-inactivated fetal bovine serum (FBS, Hyclone Laboratories, Logan,  
178 UT), 10 mM HEPES (pH 7.4) (Fisher Scientific, Pittsburgh, PA), 100 U/mL-100  $\mu\text{g}/\text{mL}$   
179 penicillin-streptomycin (Gibco, Carlsbad, CA), 1% chemically defined lipid concentrate  
180 (Sigma-Aldrich, Saint Louis, MO), 5  $\mu\text{g}/\text{mL}$  ascorbic acid (Sigma-Aldrich), 1.4  $\mu\text{M}$   
181 hydrocortisone (1 mg/mL, Sigma-Aldrich), and 1 ng/mL of recombinant basic fibroblast growth  
182 factor (Sigma-Aldrich). RAW 264.7 macrophages were cultured in complete media composed of  
183 high-glucose Dulbecco's Modified Eagle's Medium (DMEM (1x) containing Glutamax (Gibco,  
184 Carlsbad, CA) supplemented with 10% FBS and 1% v/v of penicillin-streptomycin. The culture  
185 media was changed after every 2 - 3 days. Conditioned media used for EV isolation was of the  
186 same composition except for the lack of FBS to exclude serum-derived EVs.

187

188 hCMEC/D3 cells and RAW 264.7 cells were passaged when the cells reached 95-100 %  
189 confluency. The hCMEC/D3 cells were detached with Trypsin-EDTA (TrypLE Express 1x,  
190 Gibco, Denmark) and passaged. The hCMEC/D3 cells were used only between passage numbers  
191 25 and 35. RAW 264.7 cells were passaged by dislodging the adherent cells using a cell scraper.



192 All cells were maintained at  $37 \pm 0.5$  °C in a humidified 5% CO<sub>2</sub> incubator (Isotemp, Thermo  
193 Fisher Scientific).

194

### 195 **2.3. Isolation of extracellular vesicles (EVs) from hCMEC/D3 endothelial cells and RAW** 196 **macrophages**

197 For the generation of EVs, hCMEC/D3 cells were seeded in collagen-coated 175 cm<sup>2</sup> tissue  
198 culture flasks (Greiner Bio-One GmbH, Frickenhausen, Germany) while RAW 264.7 cells were  
199 seeded directly in 175 cm<sup>2</sup> tissue culture flasks containing fresh media and cultured till 90-95%  
200 confluency. Upon confluence, the media was carefully removed, and the cell monolayer was  
201 gently washed once with 25 mL of pre-warmed sterile PBS and replaced with 25 mL of pre-  
202 warmed serum-free media in each flask and cultured in a humidified incubator. After 48 h, the  
203 conditioned media was harvested and EVs were isolated by differential centrifugation as  
204 described previously [23, 26]. Briefly, the culture supernatant was centrifuged at 300xg for 10  
205 min to pellet out the cellular debris. The supernatant was then transferred to fresh tubes and  
206 further centrifuged at 2000xg for 20 min to pellet out the apoptotic bodies. Following this, the  
207 supernatant was carefully collected in polycarbonate tubes (26.3 mL, Beckman Coulter,  
208 Indianapolis, IN), and spun at 20,000xg for 45 min in a type 50.2Ti rotor (Beckman-Coulter  
209 Optima XE-90 ultracentrifuge, Indianapolis, IN) to pellet the microvesicles (MVs). The resulting  
210 supernatant from this step was then filtered through a 0.22 µm sterile filter into polycarbonate  
211 tubes to remove the larger vesicles and centrifuged at 120,000xg for 70 min in a Type 50.2Ti  
212 rotor to obtain a pellet of exosomes (EXOs). The pellets containing MVs and EXOs were washed  
213 once with sterile PBS and centrifuged again following the procedure described above, i.e., at  
214 20,000xg for 45 min and 120,000xg for 70 min to isolate the MVs and EXOs, respectively. The

215 entire isolation was conducted at 4 °C. All the EV samples were stored at -80 °C till further use.  
216 D3-MVs and -EXOs and RAW-MVs and -EXOs indicate EV subsets obtained from the  
217 conditioned media from hCMEC/D3 monolayers and RAW 264.7 cells, respectively. It should  
218 be noted our EV isolation allowed isolating EXOs and MVs as separate fractions, but we  
219 collectively refer to the cell-secreted, membranous EXOs and MVs as EVs [31], wherever  
220 applicable.

221

## 222 **2.4. Measurement of EV protein content**

223 The total EV protein content was measured using a MicroBCA protein assay. EV samples  
224 were diluted in 1x RIPA lysis buffer containing aprotinin (10 µg/mL) and were kept on ice for 15  
225 min to lyse the EVs. A 150 µL volume of each sample was added to an equal volume of the  
226 MicroBCA working reagent in a 96 well-plate and incubated for 2 h at 37 °C per the  
227 manufacturer's instructions. Protein concentration was quantified by measuring the absorbance  
228 at 562 nm on a microplate reader (Synergy HTX multimode reader, Bio-Tek Instruments Inc.).

229

## 230 **2.5. Physicochemical characterization of EVs**

### 231 **2.5.1. Particle diameter and Zeta Potential**

232 The particle diameters and zeta potentials of EVs were measured using Zetasizer Nano  
233 (Malvern Panalytical Inc., Westborough, PA) at a EV protein concentration of 0.2 - 0.5 mg/mL  
234 at a temperature of 25 °C and a scattering angle of 173°. Particle size distribution was measured  
235 in 1x PBS while zeta potential was measured in 10 mM HEPES buffer, pH 7.4. All  
236 measurements were performed in triplicates. The data are represented as mean ± standard  
237 deviation (SD) of triplicate measurements.

238

### 239 **2.5.2. Protein composition**

240 D3-MVs, D3-EXOs, and hCMEC/D3 cells were lysed using 1x RIPA containing aprotinin  
241 (10 µg/mL) on ice for 30 min. The total protein content was quantified using Micro BCA protein  
242 assay. Samples containing 40 µg protein were mixed 3:1 with reducing Laemmli SDS sample  
243 buffer, 4X (Alfa Aesar, MA), and heated at 95 °C for 5 min on a heating block (Thermo  
244 Scientific). The samples and premixed molecular weight protein standards (Precision Plus – 250  
245 kD to 10 kD, Bio-Rad, USA) were electrophoretically separated on a 4-10% gradient gel in Tris-  
246 Glycine-SDS buffer at 120V for 90 min. The separated proteins were transferred onto a  
247 nitrocellulose membrane (Amersham Protran, 0.45 µm, Germany) at 75 V/300 mA for 90 min.  
248 The membrane was washed with Tris-buffered saline-tween 20 buffer (TBS-T buffer, 20 mM  
249 Tris-HCl, 150 mM NaCl, and 0.1% Tween-20, pH 7.4) and blocked using Li-Cor Odyssey  
250 Blocking buffer at room temperature for 1 h. The membrane was then incubated with ATP5A  
251 mouse antibody (1:1000) or and rabbit GAPDH polyclonal antibody (1:2000) prepared in  
252 Odyssey blocking solution at 4 °C overnight. The membranes were washed using TBS-T buffer  
253 followed by incubation with Alexa Fluor 790 conjugated AffiniPure Donkey Anti Mouse IgG  
254 (H+L) (1:30,000) prepared in Odyssey blocking solution at room temperature for 1 h. The  
255 membranes were again washed in TBS-T buffer, scanned on an Odyssey infrared imaging  
256 system (Li-Cor, Lincoln, NE) equipped with Image Studio 5.2 software.

257

### 258 **2.5.3. Membrane integrity of the isolated EVs**

259 We first ran fluorescent sub-micron size reference beads (Invitrogen, Carlsbad, CA) with  
260 mean diameters of 20-, 100-, 200-, and 500-nm on an Attune NxT Acoustic Focusing Cytometer

261 (Invitrogen, Singapore). The calibration beads allowed the detection of the MVs and EXOs using  
262 a 488/10 nm small particle side scatter filter (Invitrogen, Carlsbad, CA) on the BL1 channel and  
263 generate a size reference scale. The voltages for forward (FSC-H) and side (SSC-H) scatters  
264 were adjusted to 620 V and 240 V respectively and BL1 intensity was adjusted to 380. A total of  
265 5,000 events were acquired for particles within the 100 – 500 nm gate. Threshold on both  
266 forward and side scatter channels were set to 0.1 V. EV samples were run at a flow rate of 25  
267  $\mu\text{L}/\text{min}$ . Individual EV samples (approximately 50  $\mu\text{L}$  in a volume containing 40  $\mu\text{g}$  – 60  $\mu\text{g}$  of  
268 total EV protein) were labelled with 50  $\mu\text{L}$  of 5  $\mu\text{M}$  Calcein-AM (prepared in 10 mM HEPES,  
269 2.5 mM  $\text{CaCl}_2$ , diluted from a reconstituted stock solution of 5 mM Calcein-AM in DMSO) and  
270 incubated at 37  $^\circ\text{C}$  for 20 min, protected from light and diluted to a final volume of 400  $\mu\text{L}$  in 1x  
271 PBS immediately before analysis. Control samples included filtered PBS and PBS containing 5  
272  $\mu\text{M}$  calcein AM to rule out any potential noise from the reagent. Triton-X 100 (1 % v/v in PBS)  
273 was used to lyse EVs. Freshly isolated EV samples, as well as EV samples stored at different  
274 conditions (a) frozen at -20  $^\circ\text{C}$  for a week, (b) samples exposed to three freeze-thaw cycles at -20  
275  $^\circ\text{C}$  overnight followed by an ice-thaw for 3 h and (c) stored at 4  $^\circ\text{C}$  for 3 days, were labelled  
276 using calcein to determine EV membrane integrity. The fluorescent signals from the beads and  
277 labelled EVs were analyzed using density plots on Attune NxT software.

278

## 279 **2.6. Pre-transfection of donor cells with Lipofectamine/DNA complexes and isolation of** 280 **pDNA-loaded EVs**

281 hCMEC/D3 endothelial cells and RAW 264.7 macrophage cells were first transiently  
282 transfected with Lipofectamine-pDNA complexes. The donor hCMEC/D3 or RAW 264.7 cells  
283 were seeded at  $1.5 \times 10^6$  cells/well in 24-well plates until 80-100% confluency was achieved.

284 Lipofectamine 3000-pDNA (Luc-pDNA or GFP-pDNA) complexes or control Lipofectamine  
285 alone (no pDNA) were prepared with 1 dose of lipid per manufacturer's protocol (catalog#  
286 L300015, Invitrogen, Carlsbad, CA). [The manufacturer's protocol for Lipofectamine 3000 states](#)  
287 [that 1.0  \$\mu\$ L of P3000 reagent and 0.75  \$\mu\$ L of Lipofectamine 3000 reagent correspond to one dose](#)  
288 [of lipid for a 0.5  \$\mu\$ g DNA dose/per well in a 24-well plate setup \[32\]](#). Cells were transfected such  
289 that the pDNA dose was either 0  $\mu$ g/well (for the generation of naïve EVs), 0.5  $\mu$ g/well, or 1.0  
290  $\mu$ g/well (referred to as Luc0.5 or Luc1.0 henceforth) and incubated for 12 h (the total amount of  
291 pDNA transfected per 24-well plate were 0, 12, or 24  $\mu$ g for the indicated groups). The  
292 transfected cells were then cultured in serum-free medium for 48 h post-transfection. The  
293 conditioned medium was then pooled from each transfection plate and EVs were isolated from  
294 each group as described in section 2.3. D3-Luc-MV and D3-Luc-EXO and RAW-Luc-MV and  
295 RAW-Luc-EXO indicate the MVs and EXOs isolated from Luc pDNA transfected hCMEC/D3  
296 and RAW 264.7 cells, respectively. Likewise, D3-MV-GFP and D3-GFP-EXO and RAW-GFP-  
297 MV and RAW-GFP-EXO indicate the MVs and EXOs isolated from GFP pDNA transfected  
298 hCMEC/D3 and RAW 264.7 cells, respectively. For example, RAW-Luc0-MV, RAW-Luc0.5-  
299 MV, and RAW-Luc1.0-MV indicate MVs isolated after transfection of parent cells with 0  $\mu$ g,  
300 0.5  $\mu$ g, or 1  $\mu$ g pDNA per well.

301

## 302 **2.7. EV protein content in DNA-EVs and quantification of the pDNA content in DNA-EVs**

303 The protein content of the EVs in the DNA-EVs was determined using MicroBCA assay as  
304 described in 2.4. The amount of double-stranded DNA in the DNA-EVs was measured using the  
305 Quant-iT PicoGreen dsDNA assay kit following the manufacturer's protocols. DNA-EVs were  
306 lysed in 1x RIPA buffer containing aprotinin (10  $\mu$ g/mL) on ice for 30 min followed by dilution

307 in 1x TE buffer to a total volume of 100  $\mu$ L. The volumes of EV suspension were adjusted so  
308 that it stayed within the standard curve range (0  $\mu$ g – 1000  $\mu$ g of calf thymus DNA/200  $\mu$ L of  
309 assay volume). A 100  $\mu$ L volume of the diluted Picogreen reagent was added to 100  $\mu$ L of the  
310 EV samples in a black 96-well plate. The contents were mixed in a shaker incubator for 5 min at  
311 room temperature in the dark and fluorescence was measured using a microplate reader at  
312 excitation and emission wavelengths of 485 and 528 nm, respectively (Synergy HTX multimode  
313 reader, Bio-Tek Instruments Inc., USA). The percent of DNA loading in the isolated EVs was  
314 calculated using **Equation 1**.

315

$$316 \quad \text{DNA Loading (\%)} = \frac{(\text{Amount of DNA in DNA-EVs} - \text{amount of DNA in naive EVs})}{\text{Total amount of DNA transfected into the donor cells}} \times 100\% \quad \text{Equation 1}$$

317

## 318 **2.8. DNA-EV transfection in the recipient brain endothelial cells (BECs)**

319 The transfection activity of Luc DNA-EVs was measured using a luciferase assay.  
320 hCMEC/D3 cells were first seeded into collagen-coated 48-well plates at a density of 55,000  
321 cells/well. When the cells reached approximately 80% confluency, the media was freshly  
322 replaced with 150  $\mu$ L of complete medium. D3-Luc-MV; D3-Luc-EXO; RAW-Luc-MV; and  
323 RAW-Luc-EXO, each containing 10 ng of DNA were added to each well and incubated for 24 h,  
324 48 h, and 72 h. Untreated hCMEC/D3 cells and cells transfected with Lipofectamine complexes  
325 containing 10 ng of Luc-pDNA were used as controls. At 24, 48, and 72 h post-transfection with  
326 Luc-EVs, the transfection medium was discarded. The cells were washed with PBS followed by  
327 the addition of 100  $\mu$ L of 1x Luciferase cell culture lysis reagent in each well and mixed  
328 thoroughly on a shaker for 20 min at room temperature followed by four freeze-thaw cycles (-80  
329  $^{\circ}$ C for 60 min and 4  $^{\circ}$ C for 60 min) to completely lyse the cells. The luciferase assay was

330 conducted as previously described by us [26, 33]. The total cellular protein content was  
331 quantified using a BCA protein assay using the manufacturer's protocols. Luciferase expression  
332 was expressed as relative light units normalized to total cellular protein (RLU/mg protein). The  
333 RLU/mg of protein content for each group was further normalized to untreated cells.

334

## 335 **2.9. Proteomics analysis of EVs**

336 EVs (25 µg) were electrophoretically separated on 4%-10% Tris-HCl gel. The proteins were  
337 visualized using a Bio-Safe Coomassie Blue G-250 stain. The gel lanes were cut into 0.5 mm x 5  
338 mm bands.

339

### 340 ***In-gel trypsin digestion***

341 In-gel trypsin digestion was carried out as previously described [34]. Briefly, gel bands were  
342 diced into small pieces (<1 mm<sup>3</sup>) and washed with a solution of 50% acetonitrile/ 25 mM  
343 ammonium bicarbonate until visible stain was not present. The gel pieces were then dehydrated  
344 with 100% acetonitrile (ACN), reduced with 10 mM dithiothreitol (DTT) at 56 °C for 1 h, then  
345 alkylated with 55 mM Iodoacetamide (IAA) at room temperature for 45 min in the dark. Excess  
346 DTT and IAA were removed by washing the gel pieces with 25 mM ammonium bicarbonate and  
347 then twice with 100% ACN. A solution containing 20 ng/µL sequencing grade modified trypsin  
348 (Promega Corporation, Madison, WI; catalog#V511A) and 25 mM ammonium bicarbonate was  
349 added to cover the gel pieces and digestion was carried out overnight at 37 °C. The resultant  
350 tryptic peptides were extracted from the gel with 70% ACN/5% formic acid (FA), vacuum dried,  
351 and reconstituted in 18 µL 0.1% FA for nanoflow liquid-chromatography tandem mass  
352 spectrometry (nLC-MS/MS) analysis.

353

### 354 ***Tandem Mass Spectrometry***

355 Tryptic peptides were analyzed by nLC-MS/MS using a NanoAcquity UPLC (Waters'  
356 Corporation, Milford, MA) interfaced to a Velos Pro linear ion trap mass spectrometer (Thermo  
357 Fisher Scientific, Waltham, MA). For each analysis, a 1  $\mu$ L volume of protein digest was  
358 injected onto a C18 column (PicoChip column packed with Reprosil C18 3 $\mu$ m 120 Å  
359 chromatography media in a 10.5 cm long, 75  $\mu$ m ID column with a 15  $\mu$ m tip, New Objective,  
360 Inc., Woburn, MA) and then eluted off to the mass spectrometer using a 37-minute linear  
361 gradient of 3-35% ACN/0.1% FA at a flow rate of 300 nL/min.

362

363 The Velos Pro was operated in positive ionization mode with a spray voltage of 1.95 kV and  
364 capillary temperature of 275 °C. The acquisition consisted of cycles of one full-scan MS1 (AGC  
365 of  $3 \times 10^4$ , 75 ms maximum ion accumulation time, and m/z range of 375-1800) followed by eight  
366 MS/MS spectra recorded sequentially for the most abundant ions in the ion trap (minimum signal  
367 required 1000 counts,  $1 \times 10^4$  AGC target, 100 ms maximum injection time, isolation width 2 m/z,  
368 normalized collision energy 35, and activation time 10 ms). Dynamic exclusion (30 s) was  
369 enabled to minimize the redundant selection of peptides previously selected for MS/MS.

370

### 371 ***Data Analysis***

372 Collected MS/MS spectra were searched using the MASCOT search engine v2.4.0 (Matrix  
373 Science Ltd., London, England) [35] against a Swissprot Homo sapiens database (downloaded  
374 on 04/25/2019; 42439 entries) for the human samples and a Uniprot *Mus musculus* database  
375 (downloaded 01/19/2019; 94376 entries) for mouse samples. The mass tolerance was set to 1.4



376 Da for the precursor ions and 0.8 Da for the fragment ions. Peptide identifications were filtered  
377 using the PeptideProphet and ProteinProphet algorithms with a protein threshold cut-off of 99%,  
378 minimum of 2 peptides, and peptide threshold cut-off of 90% implemented in Scaffold v4.11.0  
379 (Proteome software, Portland, OR).

380

## 381 **2.10. Gene ontology and pathway enrichment analysis of EVs**

382 The web service Enrichr [36] was used to conduct enrichment analysis of the D3-EV and  
383 RAW-EV gene sets derived from Vesiclepedia (**Table S1**). Gene Ontology (GO), a system to  
384 associate collections of genes with biological terms and functions [37, 38], was derived for both  
385 the D3-EVs and RAW-EVs through the GO Biological Process database. GO terms were ranked  
386 by p-value, calculated using Fisher's exact test, based on the input gene set. In order to gain  
387 mechanistic insights pertaining to the two gene sets of interest, pathway analysis was also  
388 conducted using the BioPlanet 2019 database [39] for RAW-EVs and the KEGG 2021 Human  
389 database [40-42] for D3-EVs, with outputs being similarly ranked. It should be noted that  
390 human-specific databases were used for both the human D3-EVs and mice RAW-EVs as mice-  
391 specific databases are not available on Enrichr.

392

## 393 **2.11. Mitochondrial transfer from EVs to the recipient brain endothelial cells**

### 394 **2.11.1. Isolation of EVs from source/donor cells pre-labelled with MitoTracker Deep Red**

#### 395 **FM**

396 Confluent 175 cm<sup>2</sup> tissue culture flasks containing hCMEC/D3 cells or RAW 264.7 cells  
397 were washed with pre-warmed PBS followed by incubation with 250 nM of MitoTracker Deep  
398 Red FM (MitoT) (diluted in the respective growth medium) for 30 min at 37 °C in the dark. The

399 dye-containing medium was then replaced with their respective complete medium and further  
400 incubated at 37 °C for 1 h, followed by washing with PBS and incubation with serum-free  
401 medium for 16 h. The conditioned media was then subjected to ultracentrifugation as described  
402 in section 2.3 to isolate EVs. The isolated pellets were resuspended in 1 mL of sterile PBS. D3-  
403 MitoT-MV and D3-MitoT-EXO and RAW-MitoT-MV and RAW-MitoT-EXO indicate the MVs  
404 and EXOs isolated from MitoT-labelled hCMEC/D3 and RAW 264.7 cells, respectively. The  
405 protein content in MitoT-EVs was determined using a MicroBCA assay.

406

### 407 **2.11.2. Treatment of the recipient endothelial cells using MitoT-EVs**

408 Confluent 48-well plates of hCMEC/D3 cells were prepared as described earlier. The cells  
409 were then incubated with D3-MitoT-MV, D3-MitoT-EXO, RAW-MitoT-MV, and RAW-MitoT-  
410 EXO at different EV protein amounts viz., 3, 24, 100, and 600 µg per well. The plates were  
411 incubated for 24, 48, and 72 h at 37 °C in the dark. After incubation, the media was replaced  
412 with a phenol red-free DMEM medium. The cells were observed under an Olympus IX 73  
413 epifluorescent inverted microscope (Olympus, Pittsburgh, PA) to detect MitoT signals using the  
414 Cyanine-5 (C) channel (Cy5, excitation 635/18 nm and emission 692/40 nm) and under phase  
415 contrast settings at 20x magnification. The images were processed using cellSens dimension  
416 software (Olympus, USA) and Image J software (NIH). Cell monolayers stained with 250 nM  
417 MitoT for 30 minutes in the dark were used as a positive control to detect MitoT signals and  
418 unstained cells were used as an additional control. Image contrast was adjusted using ImageJ  
419 (NIH). Image analysis was performed by measuring mean intensity using *ImageJ* software. Each  
420 image underwent auto-thresholding with identical parameters. Mean intensity values in the

421 treated slices were normalized to control, untreated slices. Statistical analysis was performed  
422 using repeated measures one-way ANOVA using GraphPad Prism 9.1.2 software.

423

### 424 **2.11.3. Mitochondrial Functional Assessment**

425 Oxygen consumption rate (OCR) and extracellular acidification rate (ECAR) were measured in  
426 hypoxic hCMEC/D3 monolayers (20,000 cells/well cultured for four days) in a Seahorse XF96  
427 plate by XF analysis (XF24, Agilent Seahorse Technologies) as previously described [43]. Cells  
428 were treated using EXOs or MVs at doses of 30 or 150  $\mu\text{g}$  EV protein/ $\text{cm}^2$  well area  
429 corresponding to doses of 3.4 or 17.1  $\mu\text{g}$  EV protein/well in the Seahorse XF96 plate. After  
430 measurement of basal OCR, 2.5  $\mu\text{mol/L}$  oligomycin A (proton leak), 0.7  $\mu\text{mol/L}$  FCCP (to  
431 measure maximal OCR) were consecutively added. Basal glycolytic rate was calculated by  
432 determining the ECAR that is sensitive to 2-DG (100  $\text{mmol/L}$ ). The assay was performed in non-  
433 buffered Dulbecco's modified Eagle medium supplemented with 25  $\text{mmol/L}$  glucose, 1  $\text{mM}$   
434 pyruvate, and 2  $\text{mmol/L}$  glutamine. All rates were normalized to cellular protein content  
435 measured using MicroBCA assay. Data reported indicate average  $\pm$  SEM from three wells.

436

### 437 **2.11.4. Uptake of MitoT-EVs into mice acute brain slices**

#### 438 *Acute Brain Slice Preparation*

439 The Institutional Animal Care and Use Committee (IACUC) at the University of Colorado  
440 approved all experimental protocols in accordance with the National Institutes of Health and  
441 guidelines for the care and use of animals in research. Adult (20–25  $\square\text{g}$ ) male C57Bl/6 (8–12  
442 weeks) mice purchased from Charles River Laboratory (Fredrickson, NC) were used for this  
443 study. All mice were housed in standard 12-h light dark cycle with free access to food and water.

444 All experiments in the study adhered to the ARRIVE guidelines for animal  
445 experiments. Following middle cerebral artery occlusion sham surgery [44-46], mice were  
446 anesthetized with isoflurane (3%) and transcardially perfused with artificial cerebral spinal fluid  
447 (ACSF: 126 mmol/L NaCl, 2.5 mmol/L KCl, 25 mmol/L NaHCO<sub>3</sub>, 1.3 mmol/L NaH<sub>2</sub>PO<sub>4</sub>, 2.5  
448 mmol/L CaCl<sub>2</sub>, 1.2 mmol/L MgCl<sub>2</sub>, and 12 mmol/L glucose, pH 7.4) oxygenated with 95%  
449 O<sub>2</sub>/5% CO<sub>2</sub> and at ice-cold conditions (2–5°C) for 2 min before decapitation. Brains were  
450 removed and horizontal cortical or hippocampal sections (300 µm thick) were cut in ice-cold  
451 ACSF using a VT1200S Vibratome (Leica, Buffalo Grove, IL, USA) and were recovered in  
452 ACSF for 30 minutes at 37 °C before treatment with MitoT-EVs.

453

#### 454 ***Incubation with MitoT-EVs***

455 Acute brain slices were incubated in 50 µg/mL of D3-MitoT-EXO and D3-MitoT-MV  
456 diluted in normal ACSF for 2 h at 37°C, and counterstained using Hoechst 33258. Non-  
457 incubated slices were used as a negative control. The slices were fixed in 4 % of  
458 paraformaldehyde overnight at 4°C and were washed in PBS prior to mounting. The slices were  
459 imaged using a confocal microscope (Olympus FV1000 laser scanning confocal microscope)  
460 equipped with an Olympus Fluoview imaging software (Center Valley, PA, USA) under the  
461 cyanine-5 channel (Cy5, excitation 651 nm and emission 670 nm) for visualizing MitoT signals.  
462 [Image analysis was performed by measuring mean intensity using \*ImageJ\* software. Each image](#)  
463 [underwent auto-thresholding with identical parameters. Statistical differences were analysed](#)  
464 [using repeated measures one-way ANOVA using GraphPad Prism 9.1.2 software.](#)

465

#### 466 **2.12. Effects of EV exposure on the relative cellular ATP levels of the recipient BECs**

467 **2.12.1. Effect on normoxic BEC cultures**

468 We determined the effects of EV exposure using the CellTiter-Glo luminescent cell viability  
469 assay following the manufacturer's protocol. Briefly, hCMEC/D3 cells (16,000/well) were  
470 seeded in 96-well plates for 24 h in 200  $\mu$ L of D3 complete media at 37 °C and 5% CO<sub>2</sub> in a  
471 humidified incubator. After confluency, the complete media was replaced with fresh media  
472 containing EVs at different protein doses (in a total volume 100  $\mu$ L/well) and incubated for 72 h.  
473 The resulting ATP/cell viability levels in each group was measured as discussed in the following  
474 section 2.12.2.

475

476 **2.12.2. Effect on hypoxic BEC cultures**

477 BECs were exposed to oxygen-glucose deprivation (OGD) as follows: confluent hCMEC/D3  
478 monolayers were washed with pre-warmed PBS, and replaced by glucose-free media as  
479 described in [47] and placed in a hypoxia chamber (Billups-Rothenberg, CA, USA) saturated  
480 with a 5-7 min flush of 90% N<sub>2</sub>, 5% H<sub>2</sub>, 5% CO<sub>2</sub> (25 l/min). The sealed hypoxic chamber was  
481 kept at 37 °C in a humidified incubator. Different periods of OGD exposure were evaluated to  
482 induce endothelial cell death. After exposure of the 96-well plates to the optimized OGD time of  
483 4 h, the media was replaced with 100  $\mu$ L of OGD medium containing EVs suspended in PBS  
484 containing varying amounts of total EV protein and incubated in normoxic conditions (in a  
485 humidified 5% CO<sub>2</sub> incubator) for the indicated times. Healthy cells (non-OGD) cultured under  
486 normoxic conditions (~100% viability) and OGD-exposed cells subsequently cultured in  
487 normoxic conditions (~0% viability) were used as controls. Post-treatment with EVs, cells were  
488 washed with pre-warmed PBS followed by the addition of 60  $\mu$ L of complete growth medium  
489 and 60  $\mu$ L of CellTiter-Glo 2.0 assay reagent to each well. The wells were incubated in a shaker

490 at room temperature for 15 min in the dark. After 15 min, 60  $\mu$ L of the solution from each well  
491 were aliquoted into an opaque, white 96-well plate luminescence plate (Fisherbrand). Relative  
492 luminescent signals were measured using Synergy HTX multimode reader (Bio-Tek Instruments  
493 Inc., USA) at 1 sec integration time. The relative **ATP levels** (%) was calculated after  
494 normalizing the relative luminescence units (RLU) of treated cells to those untreated cells as  
495 shown in **equation 2**.

$$496 \quad \text{Relative ATP levels (\%)} = \frac{\text{RLU from group treated with EVs or PEI}}{\text{RLU from untreated cells or untreated OGD cells}} * 100 \quad \text{Equation 2}$$

497

### 498 **2.13. Formation of EV-ATP5A protein complexes**

499 Complexes of recombinant ATP5A1 protein were formed with the EVs by mixing naïve EVs  
500 (EXOs/MV 1:1 mixture) and ATP5A at an EV:ATP5A protein weight/weight (w/w) ratio of 5:1.  
501 Precalculated volumes of ATP5A solution were added slowly along the walls of the microtube  
502 containing EVs diluted in 1x PBS. The complexes were prepared by mixing these solutions and  
503 vortexed at a setting of '5' on a vortex mixer (Fisher Analog Vortex, 120V, Fisher Scientific,  
504 USA) for 30 secs. After mixing, the tubes containing the complexes were spun down for five  
505 seconds and allowed to stand at room temperature for 30 min prior to use in experiments.

506

#### 507 **2.13.1. Native gel electrophoresis**

508 The formation of the EV-ATP5A complexes was confirmed by native polyacrylamide gel  
509 electrophoresis. Free ATP5A protein, naïve EV samples, or EV/ATP5A complexes were mixed  
510 with an equal volume of native sample buffer (BioRad) and resolved on 4-10% gel in 25 mM  
511 Tris, 192 mM Glycine, pH 8.3 at 100 V for 2 h. The gels were then stained with Bio-safe

512 Coomassie Stain solution overnight before scanning using an Odyssey imager (LI-COR Inc.,  
513 Lincoln, NE) at the 800 nm near-infrared channel.

514

### 515 **2.13.2. Effect of the exposure of EV/ATP5A complexes on the ATP levels in the recipient** 516 **endothelial cells**

517 ATP5A doses of 100, 200, and 300 ng per 0.32 cm<sup>2</sup> of 96-well plate were used in these  
518 studies. The EV-ATP5A complexes were diluted in OGD media before addition to cells 4 h post-  
519 OGD exposure. The cells were incubated with the indicated samples for 4 h, washed with pre-  
520 warmed PBS, and resulting ATP levels were determined by CellTiter Glo assay (as described in  
521 section 2.11.2). The effects of the treatment were expressed as the resulting ATP levels  
522 compared to the untreated OGD cells subjected to reoxygenated/normoxic conditions for 4 h.  
523 Relative luminescent signals were measured using Synergy HTX multimode reader (Bio-Tek  
524 Instruments Inc., USA) at 1 sec integration time. The **relative ATP levels (%)** was calculated  
525 after normalizing the relative luminescence units (RLU) of treated cells to those untreated cells  
526 as shown in **equation 3**.

$$527 \quad ATP \text{ levels } (\%) = \frac{RLU \text{ from treated cells}}{RLU \text{ from untreated OGD cells}} * 100 \quad \text{Equation 3}$$

528

### 529 **2.14. Statistical analysis**

530 The number of independent experiments for each study is indicated in each figure or table  
531 legend. Each experiment was repeated at least thrice to confirm data reproducibility. The results  
532 are expressed as mean  $\pm$  standard deviation (SD). Comparative analyses were performed using  
533 either one-way or two-way ANOVA using GraphPad Prism v8 (GraphPad Software, San Diego,

534 CA). Wherever applicable, one-way ANOVA was done using Bonferroni's multiple comparisons  
535 test. Alpha was set at 0.05.

536

### 537 **3. Results and Discussion**

538

539 The objectives of the current study are two-fold: as described in the introduction section, we  
540 first sought out to re-confirm our previous results on the DNA loading and transfection of EVs  
541 from two different parent cell sources: brain endothelial cells (BECs) and macrophages, to  
542 eliminate any operator-induced systematic biases. In this study, we also conducted proteomic [and](#)  
543 [gene ontology and pathway enrichment analysis to understand possible differences between the](#)  
544 [BEC- vs. RAW-derived EVs](#). The second goal of the study was to determine the potential effects  
545 of the [innate](#) EV mitochondrial load on the cellular energetics in the recipient ischemic  
546 endothelial cells. In our previous study, we surprisingly observed a higher Luc-DNA loading in  
547 the EVs derived from RAW 264.7 macrophages (when the cells were pre-transfected with a  
548 lower 0.5 µg DNA/well compared to a higher 1.0 µg DNA/well dose) compared to BEC-derived  
549 EVs [26]. In addition, we also observed a higher DNA loading in the smaller exosomes (EXOs)  
550 compared to the larger microvesicles (MVs)—this finding was in direct contrast to the findings  
551 previously by Kanada *et al.* who reported that while EXOs failed to show expression of the  
552 reporter protein encoded by the exogenous pDNA, the larger MVs showed transfer and  
553 subsequent expression pDNA-encoded reporter protein in the recipient HEK293FT cells [23]. To  
554 rule out any unintentional, operator-induced biases in the experimental regime, an independent  
555 operator repeated the donor cell transfection and isolated DNA-loaded EVs from the brain



556 endothelial and macrophage cell lines. We compared the physicochemical characteristics of the  
557 DNA-loaded EVs [and their transfection activity in the recipient endothelial cells](#).

558

559 The brain endothelial cells have higher metabolic activity compared to the other non-brain  
560 endothelial cells [48]. Under ischemic/hypoxic conditions, the endothelial cells are susceptible to  
561 undergo apoptosis resulting in increased mitochondrial dependence for metabolism and survival  
562 [49]. During the biogenesis of EVs, mitochondria, mitochondrial proteins, or mitochondrial  
563 DNA are incorporated into these vesicles and can be transferred between cells [27]. Depolarized  
564 mitochondria can be transferred to cells under oxidative stress via MVs resulting in enhanced  
565 bioenergetics and cell survival of the recipient cells [27]. Mouse bone marrow-derived stromal  
566 cells derived MVs transferred mitochondria and increased the alveolar ATP levels in  
567 lipopolysaccharide-exposed mice lungs [29]. Airway myeloid-derived regulatory cells-derived  
568 EXOs have also been reported to transfer mitochondria to T cells and localize with the T cell's  
569 mitochondrial network [28].

570

571 The [second](#) objective of our work is to determine [whether](#) the EV mitochondrial load can be  
572 transferred to ischemic endothelial cells in an *in vitro* oxygen-glucose deprivation model of  
573 stroke and to neurons in mice acute [brain cortical and hippocampal](#) slices. The lack of ATP  
574 serves as the initial trigger in the ionic, biochemical, and cellular events that cause death and  
575 damage during stroke [50]. [Therefore, we](#), hypothesized that the transfer of innate EV  
576 mitochondria may switch the endothelial cell fate from death to survival. The underlying  
577 rationale for our hypothesis is that protecting the BECs lining the BBB will subsequently allow it

578 to maintain its barrier properties and limit BBB dysfunction-induced neurological damage in  
579 diseases like stroke.

580

581 **3.1. Isolation and characterization of hCMEC/D3 endothelial cell- and RAW 264.7**  
582 **macrophage-derived EVs**

583 As previously reported by us [26], a cell model of the human BBB, hCMEC/D3 endothelial  
584 cells, and RAW 264.7 macrophages were used to compare if the donor/source cell line has any  
585 effects on the extent of DNA loading for subsequent transfection into the recipient endothelial  
586 cells. Naïve EVs isolated from hCMEC/D3 endothelial and RAW 264.7 macrophage cells  
587 showed average particle diameters ranging between 100 to 250 nm as shown in **Fig. 1b-e**. We  
588 noted a significant difference among the average particle diameters for EXOs and MVs isolated  
589 from both cell sources. D3-EXO, D3-MV, and RAW-EXO showed heterogeneous size  
590 distributions as expected for cell-derived vesicles. A smaller fraction of EXO sized <100 nm was  
591 seen in D3-EXO while D3-MV and RAW-EXO showed particle populations >150 nm. MVs are  
592 known to be heterogeneous in size with effective particle diameters ranging from 200 - 1500 nm  
593 [51, 52]. The overall sizes of EXOs and MVs isolated from both cell lines were in agreement  
594 with previous studies [23]. **However, EVs are also prone to aggregation, which may have**  
595 **resulted in particles sizes >150 nm.** These size ranges suggest the increased likelihood of EVs  
596 entering recipient cells via endocytosis [53]. The zeta potentials of EV samples ranged between -  
597 4 and -12 mV (**Fig. 1a**). The negative zeta potential is attributed to their anionic membrane lipids  
598 like phosphatidylserine and glycosylated proteins that are incorporated into the EXOs and MVs  
599 during their biogenesis [54, 55].

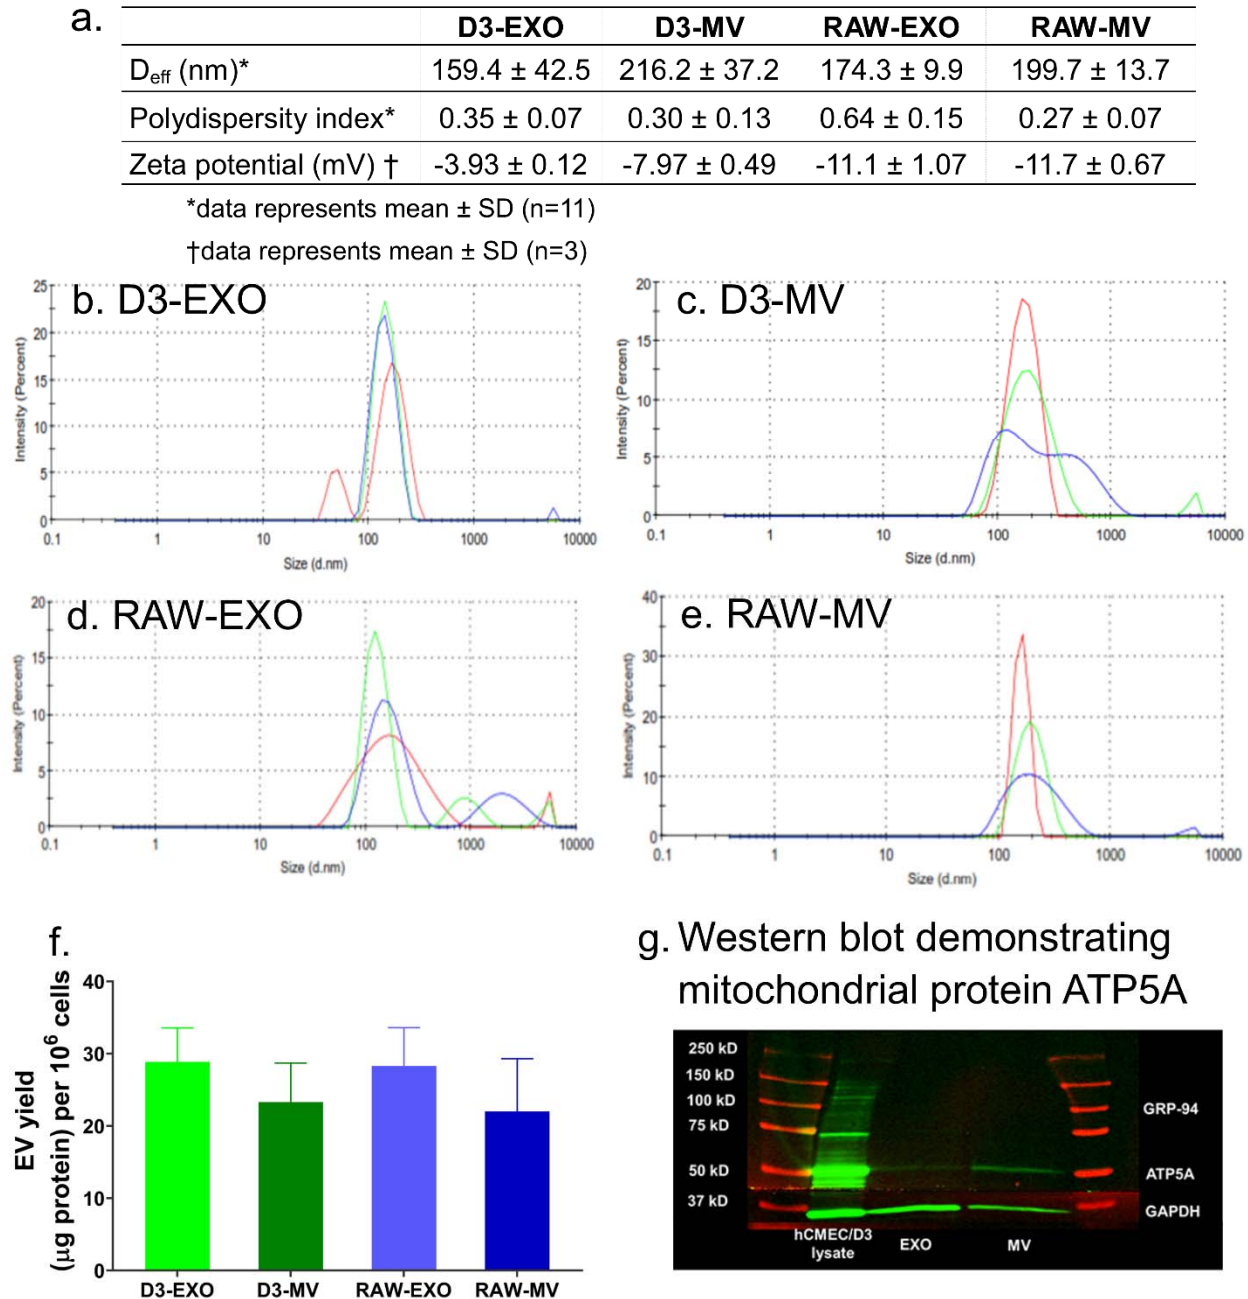

600

601 **Figure 1. Characterization of EVs derived from hCMEC/D3 (D3-EXO and D3-MV) and**  
 602 **RAW 264.7 cells (RAW-EXO and RAW-MV).** (a) Physicochemical characteristics of EVs:  
 603 Effective particle diameter ( $D_{\text{eff}}$ ), polydispersity index, and zeta potential were measured using  
 604 dynamic light scattering (DLS). The samples at a protein concentration of 0.2 – 0.5 mg/mL were  
 605 resuspended in 1x PBS and 10 mM HEPES buffer, pH 7.4 for  $D_{\text{eff}}$  and zeta potential  
 606 measurements, respectively. Representative DLS intensity plots of (b) D3-EXO (c) D3-MV (d)  
 607 RAW-EXO and (e) RAW-MV obtained from measurements on a Malvern Nano Zetasizer. The  
 608 different traces indicate three measurements of the same sample. (f) EV yield normalized to per  
 609 million cells of hCMEC/D3 or RAW 264.7 (g) Western blotting to confirm mitochondria-

610 specific EV markers. 25  $\mu\text{g}$  total protein was loaded in a 4-10% SDS gel and electrophoresed at  
611 120 V. The separated proteins were transferred on nitrocellulose membrane and stained with  
612 ATP5A and GAPDH antibodies. The blots were imaged on Odyssey imager (LI COR Inc.,  
613 Lincoln, NE) at 800 nm near-infrared channel and processed using ImageStudio 5.2 software.  
614

615 Normalization of the EV protein yields to the total cell numbers resulted in values of  
616  $28.9 \pm 4.7 \mu\text{g}/10^6$  cells and  $23.4 \pm 5.4 \mu\text{g}/10^6$  cells for D3-EXO and D3-MV, respectively, and  
617  $28.3 \pm 5.3 \mu\text{g}/10^6$  cells and  $22.0 \pm 7.3 \mu\text{g}/10^6$  cells for RAW-EXO and RAW-MV, respectively  
618 (**Fig. 1f**). It should be noted that we isolate EVs from a “conditioned” medium that lacks serum  
619 to avoid collecting serum-derived EXOs. Therefore, it is likely that cells may be sensitive to  
620 serum withdrawal. Li *et al.* investigated the release and protein composition of EVs derived from  
621 cells cultured in medium supplemented with serum-depleted EVs and EVs derived from cells  
622 cultured in serum-free media. The authors reported that although serum-free medium induced  
623 cellular stress, it also increased the release of EVs along with stress proteins like macrophage  
624 migration inhibitory factor and epoxide hydrolase 1 [56]. Contrarily, other reports suggested that  
625 the presence of serum growth factors in culture media influences the intracellular calcium that is  
626 responsible for vesicle shedding [51, 57, 58].

627  
628 MVs are known to selectively enriched with the mitochondrial protein ATP5A, a catalytic  
629 subunit of ATP synthase [59] compared to the EXO fraction. Our western blotting analysis  
630 confirmed the same (**Fig. 1g**). Glyceraldehyde 3-phosphate dehydrogenase (GAPDH) protein  
631 was also used as an additional protein in our study. GAPDH (36 kD) is commonly used as an  
632 internal control to ensure uniform protein loading. We noticed a lower expression of GAPDH in  
633 the MV fraction compared to the EXO fraction. This is consistent with earlier findings that  
634 reported a greater GAPDH expression in EXOs than in the MVs [23].

635

636 The integrity of EV membranes and **its stability upon storage** were determined using flow  
637 cytometry using previously reported methods [60, 61]. Calcein AM is a non-fluorescent,  
638 membrane-permeable dye that undergoes hydrolysis by intravesicular esterases present only in  
639 an intact vesicle [62]. Derivatives of calcein especially its acetomethoxy derivative (Calcein-  
640 AM) have been extensively studied for live cell tracking and detection. This has also been  
641 applied to distinguish functional and metabolically-active EVs from the disrupted EV or protein  
642 debris [63]. Fluorescent sub-micron size reference beads with mean diameters of 20-, 100-, 200-  
643 , and 500-nm were used to generate a size reference scale. Gating was applied to exclude the  
644 background laser noise in the scatter plots [63]. The detection gate was set between 100 and 500  
645 nm to allow the detection of the beads alone (**Fig. S1a,b**). Gated events for EVs (R1)  
646 corresponding to the free calcein-AM solution in 1x PBS (**Fig. S1c,d**) and non-stained EVs (**Fig.**  
647 **S1e-h**) were used as controls. Additionally, an EV sample lysed using 1% (v/v) of Triton X-100  
648 was used as a negative control. As expected, no positive events for EVs were observed following  
649 the treatment of EVs with Triton X-100 (**Fig. S1m-p**).

650

651 RAW-MV (**Fig. S1i**), RAW-EXO (**Fig. S1j**), D3-MV (**Fig. S1k**), D3-EXO (**Fig. S1l**) with  
652 calcein-positive counts were noted to be present corresponding to particle diameters ranging  
653 from 100 to 200 nm. This correlates with our DLS data wherein the mean effective particle size  
654 diameters of D3-EXO and D3-MVs ranged from 160 to 250 nm. Lucchetti *et al.* also reported  
655 100 nm-sized EXOs with a refractive index less than 1.4 based on the side scatter signal intensity  
656 compared to 100 nm polystyrene beads (refractive index of ~1.6) [63].

657

658 To investigate the effect of storage conditions on the integrity of EV membranes, EV  
 659 samples were stored at -20 °C and 4 °C for different periods until analysis and compared to the  
 660 control [group of](#) freshly-isolated EV samples. From the SSC/FSC scatter profile, it appeared that  
 661 their sizes were comparable to the control, but the number of EV events was significantly  
 662 altered. After storage for 3 days at 4 °C, the number of EV events for D3-EXO was markedly  
 663 lower compared to the control (**Table 1**). Freezing the EVs at -20 °C retained the number of EV  
 664 events better than those samples that were subjected to three freeze-thaw cycles (frozen thrice at  
 665 -20 °C followed by thawing for 3 h at 4°C). The [apparent](#) stability of EVs as a function of their  
 666 membrane integrity was calculated using **equation 4**.

667  
 668 [Apparent](#) stability of EVs at the test storage condition (%) was calculated using the following  
 669 equation:

$$\frac{\text{Number of EV events in the sample at the indicated storage condition} - \text{Number of EV events in a freshly isolated EV sample}}{\text{Number of EV events in a freshly isolated EV sample}} \times 100$$

Equation Error! Bookmark not del

670 **Table 1.** [Apparent](#) stability of EVs upon storage at different conditions

***Apparent stability of EVs upon storage at the indicated conditions***

| Sample  | 4 °C for 3 days | -20 °C for 1 week | Freeze-thawed thrice at -20 °C followed by thawing for 3 h on 4°C |
|---------|-----------------|-------------------|-------------------------------------------------------------------|
|         | (%)             | (%)               | (%)                                                               |
| D3-EXO  | 61.9 ± 9.3      | 106.7 ± 16.1      | 82.7 ± 29.6                                                       |
| D3-MV   | 77.7 ± 16.7     | 105.7 ± 24.7      | 89.5 ± 26.0                                                       |
| RAW-EXO | 75.1 ± 13.6     | 95.7 ± 23.7       | 98.1 ± 6.3                                                        |
| RAW-MV  | 58.6 ± 12.7     | 107.7 ± 21.4      | 89.9 ± 16.3                                                       |

671  
 672 It can be noted that in some samples, the number of EVs events were higher than the control  
 673 sample. A similar observation was seen earlier in [61], wherein the number of MV events were

674 higher upon storage at -80 °C with a simultaneous decrease in the size of MVs, the mechanism  
675 for which is currently unknown. Similarly, a variation and a trend towards an increase in EV  
676 count were observed upon storage at - 20 °C and - 80 °C by Jeyaram and colleagues [64].  
677 Likewise, Kong *et al.* observed that MVs isolated from EDTA-anticoagulated plasma stored at -  
678 80 °C for 4 weeks increased the MV count and gradually decreased the MV size. The number of  
679 MVs in plasma increased almost two-fold upon storage for 4 weeks at -80 °C versus the control  
680 sample which was collected and centrifuged immediately without any storage. The exact  
681 mechanism for the apparent “increase” in EV/particle numbers is currently unknown [61].  
682 Lőrincz *et al.* observed an increase in the geometric mean of the flow cytometer side-scatter  
683 distribution for EV fractions after storage for 28 days at -20 °C [65]. This could be due to a shift  
684 in the EV size upon storage at -20 °C [64] likely due to [deaggregation](#)/structural change of the  
685 EVs [65]. Lőrincz *et al.* suggested that the swelling of vesicles upon storage may have caused  
686 more of the smaller-sized vesicle fraction to be detected in the scatter plots [65]. [The apparent](#)  
687 [stability of EV](#) is calculated by the difference in the number of events recorded in the EV  
688 samples stored at different storage conditions in comparison to freshly isolated EV samples.  
689 Therefore, an increase in the particle counts in the gated area is subsequently reflected as  
690 increased “apparent” stability values.

691

### 692 3.2. DNA-loaded EVs derived from hCMEC/D3 endothelial cells and RAW 264.7 693 macrophages

694 As previously reported by us [26], a passive transfection-  
695 based approach was used to engineer the EVs using Luc-  
696 pDNA as a model plasmid. We used Lipofectamine:pDNA  
697 ratios of 1:1 to transfect the parent cells to avoid any side  
698 effects of excess/free lipofectamine. The non-specific toxicity  
699 of cationic lipids [66], their potential to alter the cell gene  
700 expression, and their potential effects to alter the innate EV  
701 cargo [67] cannot be ignored. Therefore, we used the  
702 minimally-required amount of lipofectamine to transfect  
703 pDNA into the parent cells while varying the amount of Luc  
704 DNA – 0.5 or 1.0  $\mu\text{g}$  (Luc0.5 or Luc1.0), transfected into the  
705 parent cells. We used a QuantiT Picogreen assay to determine  
706 the dsDNA loading in the EVs isolated from hCMEC/D3  
707 endothelial cells and RAW 264.7 macrophages.

708 **Figure 2. Measurement of DNA content in Luc pDNA-loaded**  
709 **EVs derived from hCMEC/D3 endothelial cells and RAW 264.7**  
710 **macrophages and their transfection activity in the recipient**  
711 **hCMEC/D3 endothelial cells.** hCMEC/D3 endothelial and RAW  
712 264.7 macrophages were transfected with Lipofectamine-Luc  
713 pDNA at a pDNA dose of 0.5  $\mu\text{g}$ / or 1.0  $\mu\text{g}$ /well in a 24-well-plate  
714 ( $n = 3$ ). (a) The percent Luc-DNA loading in the isolated EVs was  
715 measured by Quant-iT Picogreen dsDNA assay using *Equation 1*  
716 (b) Transfection of D3-derived Luc EVs, (c) RAW-derived Luc-  
717 EVs and (d) Lipofectamine/Luc pDNA complexes into the recipient hCMEC/D3 endothelial cells at a  
718 DNA dose of 10 ng of DNA/well ( $n = 4$ ). Luciferase gene expression was expressed as Relative light  
719 units (RLU) normalized to total cellular protein content and further normalized to values from the control,  
720 untreated cells. Data are presented as mean  $\pm$  SD ( $n = 4$ ), \* $p < 0.05$ , \*\* $p < 0.01$ , \*\*\* $p < 0.001$ , \*\*\*\* $p <$   
721  $0.0001$  by two-way ANOVA of the indicated groups and Bonferroni's multiple comparisons test.

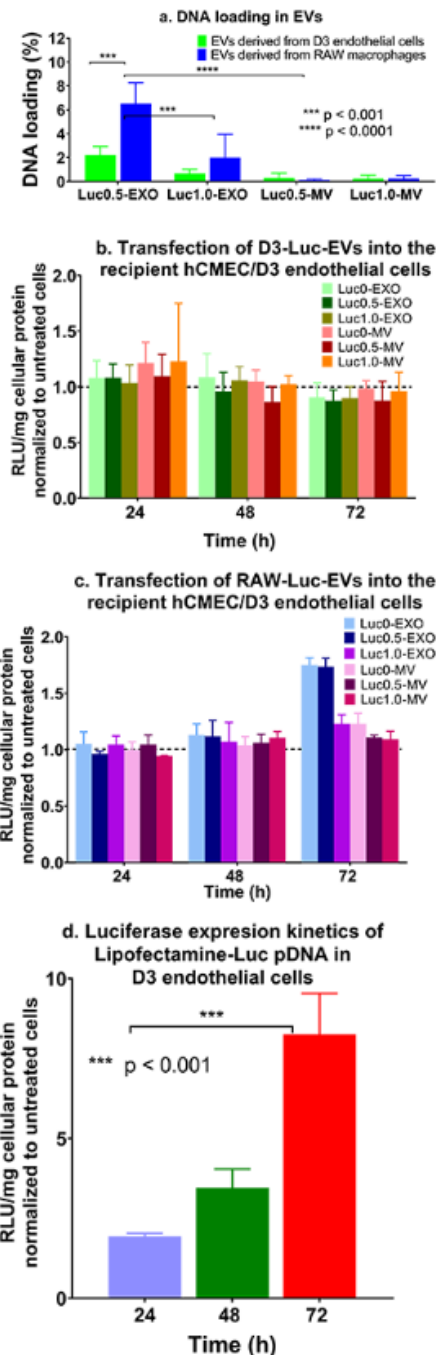



722

723 Consistent with our previous findings, our data showed that the RAW-Luc-EXO loaded more  
724 DNA than the D3-Luc-EXO ( $p < 0.001$  for Luc0.5) compared to the RAW-Luc-MV and D3-  
725 Luc-MV. Moreover, RAW-Luc-MV revealed no significant difference in their DNA loading at  
726 both the DNA doses of 0.5 and 1.0  $\mu\text{g}/\text{well}$  compared to D3-Luc-MV at their respective doses.  
727 However, Luc-pDNA loading in RAW-Luc0.5-MV was significantly lower ( $p < 0.0001$ ) than  
728 RAW- Luc0.5-EXO. The percent DNA loading (**Fig. 2a**) was calculated using **equation 1**. Both  
729 D3-Luc0.5-EXO and RAW-Luc0.5-EXO showed almost a three-fold increase in the percent  
730 DNA loading compared to D3-Luc1.0-EXO and RAW-Luc1.0-EXO. No significant differences  
731 were noted in the extent of DNA loading in MVs derived from hCMEC/D3 endothelial and  
732 RAW 264.7 macrophage cells. The maximum level of DNA loading was observed in RAW-  
733 Luc0.5-EXO (approximately 6.5%) followed by RAW-Luc1.0-EXO and D3-Luc0.5-EXO.

734

735 The reproducible observations of higher pDNA-Luc loading in RAW-derived EVs may  
736 likely be due to the fact that brain endothelial cells possess high intrinsic resistance to  
737 transfection compared to the other cell lines even while using the potent non-viral transfection  
738 agents [68, 69] and as a result, BEC-derived EVs also concomitantly load lower amounts of the  
739 transfected DNA. We also posit that as EXOs are endosomal-derived vesicles compared to the  
740 membrane-derived MVs, there is a greater likelihood that the lipofectamine/DNA complexes  
741 (that are known to be internalized via endocytosis) or part of the released DNA were entrapped  
742 in these EXOs compared to MVs. In other words, there is a natural overlap between the  
743 subcellular trafficking of the lipofectamine/DNA complexes and the biogenesis of exosomes.  
744 This natural overlap may allow a greater loading of the exogenous DNA into the smaller EXOs

745 compared to the larger MVs that bud off from plasma membranes. Therefore, from two studies  
746 conducted by independent operators in our lab ([26] and the current study), we conclude that the  
747 smaller EXOs loaded a greater amount of exogenous pDNA compared to the larger MVs.  
748 Noteworthy, EV production and release into the culture medium is a dynamic process that  
749 depends upon the production rate and the recycling and reuptake rates of EVs back into the cells  
750 [70]. This may have resulted in lower pDNA loading in the slow-dividing hCMEC/D3-derived  
751 EVs than those derived from rapidly-dividing RAW 264.7 macrophage cells.

752

753 Consistent with our previous observations, the loading efficiency of pDNA in the EVs was  
754 independent of the pDNA dose transfected into the donor/source cells (0.5 vs. 1  $\mu\text{g}/\text{well}$ ). An  
755 increase in the transfected pDNA dose (Luc1.0-EXO or Luc1.0-MV) did not result in a  
756 measurable increase in DNA transfer or the resulting luciferase protein expression compared to  
757 Luc0.5-EXO or Luc0.5-MV groups derived from both the cell lines (**Fig. 2b and c**). It has been  
758 reported that the loading of DNA into EVs is dependent upon the size of the DNA construct used  
759 [25]. Electroporation has shown maximal DNA loading levels of  $\sim 2\%$  for 750 bp DNA.  
760 Lamichhane *et al.* reported that linear dsDNA molecules of 250 bp were loaded into the EVs  
761 efficiently via electroporation at a maximum amount of 5  $\mu\text{g}$  linear dsDNA [25]. Their data  
762 showed that approximately 50 ng of DNA was loaded in  $3 \times 10^8$  EVs when an initial amount of  
763 2.5  $\mu\text{g}$  of linear dsDNA was used [25]. Plasmid DNA and linear DNA greater than 1000 bp were  
764 not loaded using the electroporation approach. The suggested plasmid DNA cut-off is  $\sim 4.5$  to  
765  $\sim 10$  kb albeit the loading efficiencies were  $< 0.2\%$  [25]. The size of the plasmids used in the  
766 study was 6.7 kb and 5.8 kb for Luc-pDNA and GFP-pDNA, respectively. The DNA loading in  
767 D3-GFP0.5-EXO and D3-GFP1.0-EXO was 0.58 % and 0.36 % respectively, while that in D3-

768 GFP0.5-MV and D3-GFP1.0-MV were 0.11 % and 0.10 % respectively. As observed in the EVs  
769 loaded with Luc-pDNA, the EXOs showed a greater DNA loading capacity compared to MVs.  
770 Likewise, the DNA loading in RAW-GFP0.5-EXO and RAW-GFP1.0-EXO was 0.29% and  
771 0.48% respectively, while that in RAW-GFP0.5-MV and RAW-GFP1.0-MV were 0.36% and  
772 0.36% respectively. MVs derived from both the cell lines showed an insignificant gradual  
773 increase in exogenous DNA (from 0/naïve EVs to 1 µg/well) and are likely due to the variations  
774 in DNA loading that correlates with their biogenesis pathways as discussed in the previous  
775 paragraph. Interestingly, our results contradicted previously published reports [23, 25], that  
776 suggested that MVs showed a greater potential for transfection compared to EXOs due to  
777 increased DNA loading although Lamichhane *et al.* did not observe measurable transfection of  
778 the DNA-EVs [25].

779

780 The differences in DNA loading between EXOs and MVs may also be explained because  
781 EXOs have less endogenous or innate cargo. A proteomics study comparing the protein content  
782 of EXOs and MVs reported that MVs are enriched with proteins related to the cytoskeletal  
783 network and cortical activity compared to the EXOs [71]. Moreover, if MVs are released through  
784 a regulated, generally low, steady-state process as compared to EXOs that are released  
785 constitutively [72], the biogenesis of MVs loaded with DNA will also be comparatively lower.  
786 No significant changes in the total EV protein content were observed with DNA-loaded EVs and  
787 EVs isolated from cells treated with lipofectamine alone (no DNA). This indicated that the  
788 biogenesis and release of EVs were not unaffected due to the transfection process using cationic  
789 lipids (lipofectamine) at the different pDNA amounts. We further compared the particle  
790 diameters of naïve vs. DNA-loaded EVs (**Table 2**) to determine [if DNA loading affected EV](#)

791 **particle characteristics.** We prepared EVs loaded with both luciferase (luc) and eGFP (GFP)  
 792 pDNA to determine if the type of the pDNA construct affected their particle characteristics. It is  
 793 well-documented that the physicochemical characteristics of nanoparticle carriers strongly affect  
 794 their biological activity *in vitro* [33, 73, 74]. We noted that the effective particle diameters of  
 795 DNA-EVs derived from hCMEC/D3 cells were somewhat unchanged with a slightly higher PDI  
 796 compared to naïve D3-EVs, however, the DNA-EVs derived from RAW 264.7 cells seemed to  
 797 have larger vesicular sizes as well as showed a heterogeneous sample with a greater PDI,  
 798 compared to naïve RAW-EVs. The noted changes in the particle diameters of RAW-EVs may be  
 799 reflective of the exogenous DNA loading.

800

801 **Table 2.** Effective particle diameters ( $D_{\text{eff}}$ ) of DNA-EVs

| Sample                | Average $D_{\text{eff}}$ (nm) | PdI       | Sample         | Average $D_{\text{eff}}$ (nm) | PdI       |
|-----------------------|-------------------------------|-----------|----------------|-------------------------------|-----------|
| <b>Naïve D3-EXO</b>   | 159.4 ± 42.5                  | 0.4 ± 0.1 |                |                               |           |
| <b>D3-Luc0-EXO</b>    | 133.7 ± 19.7                  | 0.4 ± 0.1 | D3-GFP0-EXO    | 156.6 ± 7.3                   | 0.4 ± 0.0 |
| <b>D3-Luc0.5-EXO</b>  | 111.1 ± 5.7                   | 0.4 ± 0.1 | D3-GFP0.5-EXO  | 122.2 ± 5.8                   | 0.5 ± 0.0 |
| <b>D3-Luc1.0-EXO</b>  | 133.4 ± 25.4                  | 0.3 ± 0.1 | D3-GFP1.0-EXO  | 118.8 ± 0.8                   | 0.4 ± 0.1 |
| <b>D3-MV</b>          | 216.2 ± 37.2                  | 0.3 ± 0.1 |                |                               |           |
| <b>D3-Luc0-MV</b>     | 190.2 ± 13.8                  | 0.3 ± 0.1 | D3-GFP0-MV     | 339.3 ± 122.3                 | 0.4 ± 0.1 |
| <b>D3-Luc0.5-MV</b>   | 306.6 ± 105.5                 | 0.4 ± 0.1 | D3-GFP0.5-MV   | 204.3 ± 17.4                  | 0.4 ± 0.0 |
| <b>D3-Luc1.0-MV</b>   | 368.5 ± 37.9                  | 0.5 ± 0.1 | D3-GFP1.0-MV   | 176.1 ± 22.3                  | 0.4 ± 0.0 |
| <b>RAW-EXO</b>        | 174.3 ± 9.9                   | 0.6 ± 0.2 |                |                               |           |
| <b>RAW-Luc0-EXO</b>   | 483.5 ± 120.4                 | 0.6 ± 0.1 | RAW-GFP0-EXO   | 594.7 ± 204.0                 | 0.5 ± 0.1 |
| <b>RAW-Luc0.5-EXO</b> | 163.9 ± 25.4                  | 0.6 ± 0.1 | RAW-GFP0.5-EXO | 385.0 ± 236.2                 | 0.5 ± 0.1 |

| EXO          |               |           | EXO         |               |           |
|--------------|---------------|-----------|-------------|---------------|-----------|
| RAW-Luc1.0-  | 122.0 ± 15.8  | 0.3 ± 0.0 | RAW-GFP1.0- | 556.5 ± 303.8 | 0.6 ± 0.3 |
| EXO          |               |           | EXO         |               |           |
| Naïve RAW-MV | 199.7 ± 13.7  | 0.3 ± 0.1 |             |               |           |
| RAW-Luc0-MV  | 472.1 ± 198.0 | 0.5 ± 0.2 | RAW-GFP0-MV | 276.7 ± 37.7  | 0.5 ± 0.1 |
| RAW-Luc0.5-  | 668.0 ± 210.6 | 0.6 ± 0.2 | RAW-GFP0.5- | 288.5 ± 23.8  | 0.4 ± 0.0 |
| MV           |               |           | MV          |               |           |
| RAW-Luc1.0-  | 585.4 ± 37.5  | 0.6 ± 0.0 | RAW-GFP1.0- | 386.3 ± 61.3  | 0.5 ± 0.1 |
| MV           |               |           | MV          |               |           |

802

### 803 3.3. Transfection of DNA-loaded EVs in the recipient hCMEC/D3 endothelial cells

804 We studied the ability of the engineered EVs to transfer Luc-pDNA into recipient D3  
805 endothelial cells *in vitro*. Recipient hCMEC/D3 cells were transfected using Luc-EVs derived  
806 from either hCMEC/D3 endothelial cells or RAW macrophages. Transfection activity of D3-  
807 derived Luc-EVs is shown in **Fig. 2c** and RAW-derived EVs is shown in **Fig. 2d**. Homotypic  
808 EVs with analogous cell membranes typically show a higher cellular uptake due to self-  
809 recognition compared to heterotopic EVs [75].

810

811 EVs are heterogeneous vesicles and it is known that even EVs obtained from the same cells  
812 differ in their content [76]. Willis *et al.* observed that EXOs larger than 80 nm are enriched in  
813 flotillin-1 and CD 63, while those smaller than 80 nm are enriched with TSG101 and ALIX [77].  
814 EXO subpopulations are known to exhibit differential packaging of nucleic acids [78]. Given the  
815 inherent heterogeneity of these cell-derived vesicles, we decided that the best approach is to  
816 transfect the recipient cells at a constant amount of DNA (10 ng), instead of transfecting using a

817 constant number of EVs. Lesson learnt from the non-viral transfection field indicates that  
818 amongst factors such as the chemical composition of the carriers (lipids/polymers),  
819 carrier/nucleic acid ratios, etc., the DNA dose is one of the critical factors that determine the  
820 transfection outcomes.

821  
822 In comparison to the EVs, the positive control group transfected with Lipofectamine-Luc-  
823 pDNA complexes containing an equivalent amount of pDNA showed comparatively higher  
824 expression of luciferase (almost 6 to 8-fold increase in luciferase expression compared to  
825 untreated cells) and such increases persisted for over 72 h in hCMEC/D3 endothelial cells (**Fig.**  
826 **2d**). Our findings are consistent with a previous study that reported that cationic lipids showed an  
827 increased photon flux on the 2<sup>nd</sup>-day post-transfection that decreased gradually over 7 days [79].  
828 Overall, our results on DNA loading into the EVs were consistent with our previous study. This  
829 suggested that any unintentional/operator-induced biases did not cause the higher DNA loading  
830 in the smaller EXOs compared to the larger MVs, observations that are in contrast previously  
831 published results [23].

#### 832 833 **3.4. Proteomics study to determine potential compositional differences in D3- vs. RAW-** 834 **derived EVs**

835 We conducted proteomics analyses of the EVs in an effort to **understand potential**  
836 **compositional differences between D3- and RAW-derived EVs**. Biogenesis of EXOs and MVs  
837 involves the packaging of cytoplasmic proteins and membrane proteins in the vesicles. Liquid  
838 chromatography-tandem mass spectrometry (LC-MS/MS) was used to qualitatively study the  
839 proteins present in EVs. Previous studies have identified 295 proteins in urinary exosomes [80]

840 and 272 in mast cell-derived EXOs [81] upon mapping to Entrez gene identifiers. The proteome  
 841 profiles of our D3-EVs and RAW-EVs resulted in the identification of 136 proteins in D3-EXOs,  
 842 116 proteins in D3-MV, 169 proteins in RAW-EXO, and 141 proteins in RAW-MVs. We  
 843 compared and studied the overlap of our EV proteins with ‘Vesiclepedia’, a publicly available  
 844 extracellular vesicle protein database. We identified most of the top 100 proteins enlisted in the  
 845 Vesiclepedia database (**Table S1**).

846  
 847 **Table S1:** Top 100 proteins identified in the isolated EVs compared to Vesiclepedia database  
 848

849 **Table 3:** Proteomic analysis highlighting key proteins in EVs

850 (\*Yes/not detected indicates the expression of the listed proteins in the respective samples).

| <b>Protein Category</b>                   | <b>D3-EXO</b> | <b>D3-MV</b> | <b>RAW-EXO</b> | <b>RAW-MV</b> |
|-------------------------------------------|---------------|--------------|----------------|---------------|
| <i>Heat shock proteins and chaperones</i> |               |              |                |               |
| HSP 90                                    | Yes           | Yes          | Yes            | Yes           |
| Hspa5                                     | Not detected  | Not detected | Yes            | Yes           |
| Heat shock 70 kDa protein                 | Yes           | Yes          | Yes            | Yes           |
| HSPβ1                                     | Yes           | Yes          | Not detected   | Not detected  |
| Heat shock protein 105 kDa                | Not detected  | Not detected | Yes            | Yes           |
| Hspa8                                     | Not detected  | Not detected | Yes            | Yes           |
| T-complex protein 1                       | Yes           | Yes          | Yes            | Yes           |

851

852

853 We speculate that the enrichment of HSP proteins in the EVs may have contributed to the  
 854 observed ATP increases in the normoxic as well as hypoxic endothelial cultures (**Fig. 6**). Heat-

855 shock 70-kDa proteins (HSP70, HSP71A), constitutive heat-shock proteins (HSPA8 and  
 856 HSPA5), HSP105, and HSP90 (HSP90A/B) were present in EXOs and MVs isolated from  
 857 hCMEC/D3 and RAW 264.7 cells. HSP-beta (HSP $\beta$ 1) was specifically expressed in D3-EVs,  
 858 while HSP105 and HSPA8 (Q3UBA6) were specifically observed in RAW-EVs. HSPA8 and  
 859 HSP90 are reported to be among the top ten proteins found in most of the EXOs [82].

860

### 861 3.5. Gene ontology and pathway enrichment analyses

862 The gene ID for top-100 proteins identified from the Vesiclepedia data base was further  
 863 distilled into gene sets exclusively expressed in the D3- and RAW-EVs (**Table S2**).

864

#### 865 **Table S2:** Gene IDs for D3-EVs versus RAW-EVs

866

867 **Figure 3. GO and pathway enrichment analyses revealed RAW- and D3-EVs overexpress glycolytic processes.** The Enrichr web service was  
 868 used to analyze enriched pathways and GO terms within the two gene sets for RAW- and D3-EVs. Gene ontology analysis using the 34-gene set for D3-  
 869 EVs and 42-gene set for RAW-EVs showed that GO terms surrounding glycolytic process are greatly overexpressed in the D3 cells ( $p = 6.99 \times 10^{-12}$ ) (a),  
 870 while in addition to glycolytic terms, there were a significant amount of neutrophil-related GO terms ( $p = 5.13 \times 10^{-13}$ ) in RAW-EVs (b). Pathway analysis  
 871 results indicated that glycolysis pathways were overexpressed in both D3- and RAW-EVs ( $p = 1.4 \times 10^{-9}$  and  $1.9 \times 10^{-10}$ ). p-values were calculated using  
 872 Fisher's exact test.

883

884 The GO enrichment analyses for D3-EVs resulted in

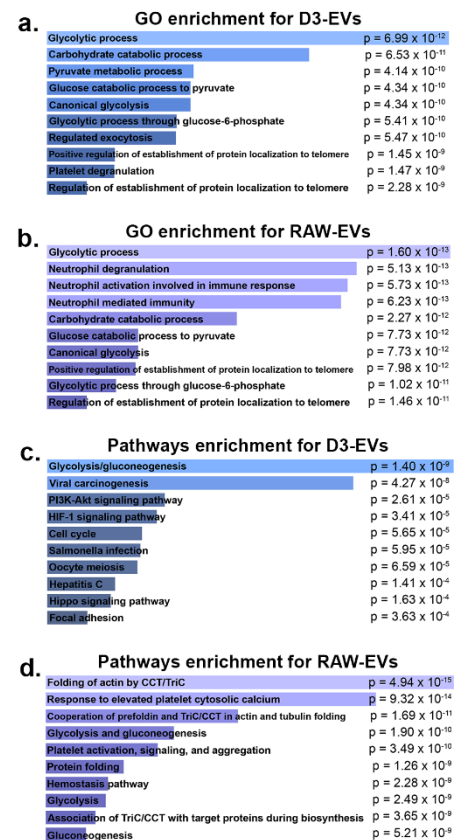



885 a very high association to glycolysis-related processes (**Fig. 3**). Glycolytic process  
886 (GO:0006096) was the most overexpressed term, followed by carbohydrate catabolic process  
887 (GO:0016052) ( $p = 6.53 \times 10^{-11}$ ) and pyruvate metabolic process (GO:0006090) ( $p = 4.14 \times 10^{-10}$ )  
888 <sup>10</sup>) (**Fig. 3a**). The GO analyses of RAW-EVs revealed an abundance of neutrophil-related terms,  
889 accounting for three out of the four most significant GO terms. Yet, glycolytic process again was  
890 the highest ranked ( $p = 1.60 \times 10^{-13}$ ), then followed by neutrophil degranulation (GO:0043312)  
891 and neutrophil activation involved in immune response (GO:0002283) ( $p = 5.73 \times 10^{-13}$ ) (**Fig.**  
892 **3b**).

893  
894 Analogous to GO analyses, we derived a list of overexpressed pathways in the two gene sets  
895 corresponding to RAW- and D3-EVs to better understand their mechanistic actions. For D3-EVs,  
896 glycolysis/gluconeogenesis appeared the most significant ( $p = 1.40 \times 10^{-9}$ ), followed by viral  
897 carcinogenesis and, after a sizeable gap in significance, PI3K-Akt and HIF-1 signalling pathways  
898 (**Fig. 3c**). In RAW-EVs, two of the top three, and three of the top ten, overexpressed pathways  
899 were related to the CCT/TriC molecular chaperone (**Fig. 3d**) followed by  
900 glycolysis/gluconeogenesis pathways. The results from this enrichment analysis support, for one,  
901 the strong metabolic and glycolytic association of D3-EVs. Therefore, we speculated that the  
902 D3-derived EVs may be strongly associated with processes that contribute to the mitochondrial  
903 transfer (**Fig. 4, 5 and 7**) and those linked with the production of ATP (**Fig. 6**). Interestingly, the  
904 analysis also showed numerous overexpressed neutrophil-associated GO terms in RAW-EVs.  
905 This can be partially attributed to their immune origin wherein processes like degranulation also  
906 contribute to glycolysis, exocytosis, and the production of cell energy [83]. In light of their

907 [potent enrichment in glycolytic pathways, we chose to focus on aspects related to EV-mediated](#)  
908 [mitochondrial transfer for the remainder of this study.](#)

909

### 910 **3.6. Mitochondrial transfer from EVs to recipient brain endothelial cells**

911 EVs are reported to contain mitochondria, mitochondrial proteins, or mitochondrial DNA  
912 (mtDNA) and are transferable between cells [27]. Transfer of mitochondria either in the form of  
913 depolarized mitochondria that is known to be present in MVs [27] or as polarized mitochondria  
914 in EXOs [28] has been reported. Mitochondrial proteins like ATP5A were enriched in the MVs  
915 derived from brain endothelial cells [26, 84] and the umbilical cords of infants [85]. Moreover,  
916 the presence of ATP5A is also reported in the exosomal fraction isolated from murine cancer-  
917 associated fibroblasts and in serum obtained from adults with Parkinson's disease [86, 87].

918

919 Transfer of mitochondria to the recipient cells is possible via either formation of tunnelling  
920 nanotubes, cellular fusion, GAP junctions, or microvesicles [88, 89]. F-actin microtubules or  
921 tunnelling tubes facilitate the transfer of cytoplasmic content and mitochondria to the recipient  
922 cells [90]. Mitochondrial transfer to cells via EVs can thus increase the cellular bioenergetics in  
923 the recipient cells [27, 28]. The secretion of paracrine factors, transfer of mitochondria [88, 89]  
924 [and](#) the presence of protective/antiapoptotic genetic messages or macrophage polarizing miRNAs  
925 [91, 92] are known to revive the injured cells and protect against subsequent tissue injury.

926

927 Phinney *et al.* reported that MV-mediated mitochondrial transfer under oxidative stress can  
928 improve the cell survival in the recipient macrophage cells by improving their mitochondrial  
929 bioenergetics. The authors reported that though EXOs do not contain mitochondria, they contain

930 mtDNA that can be also transferred to the recipient cells [27]. Despite the low transfection  
931 activity of EVs containing exogenous DNA, we wanted to determine if mitochondria in EVs can  
932 be exploited for increasing the cellular energetics in the recipient endothelial cells. During  
933 ischemia/reperfusion (I/R) injury, the oxygen-glucose deprived endothelial cells lining the BBB  
934 undergo structural and functional damage leading to poor patient outcomes post-I/R injury [93].  
935 Therefore, protection of the BBB endothelial cells is considered an effective strategy to decrease  
936 acute cell death in ischemic stroke. The presence of mitochondria organelles can increase the  
937 intracellular ATP levels and cell viability of the injured endothelial cells, thus improving  
938 mitochondrial bioenergetics, contributing to neuroprotection in an ischemic brain, and repairing  
939 brain injury [94]. The lack of ATP synthesis following oxygen and glucose deprivation sets off  
940 energy failure and loss of ionic gradients [50]. Albeit the lack of ATP cannot be equated with  
941 ischemic cell death, it is important to note that the initial trigger of ATP loss orchestrates  
942 multiple ionic, biochemical, and cellular events that lead to tissue death [95]. It is also known  
943 that glutamate excitotoxicity and calcium overload serve as additional triggers of cell death  
944 resulting in further depletion of ATP that compounds the events leading to acute cell death.  
945 Therefore, we posit that mitochondrial-transfer mediated ATP increases may serve to decrease  
946 the endothelial cell death in an *in vitro* oxygen-glucose deprivation model of stroke.

947

948 MitoTracker Deep Red (MitoT) is a carbocyanine dye that stains respiring mitochondria in  
949 live cells [96, 97] utilizing the mitochondrial membrane potential. Thus, Mitotracker Red  
950 staining is selective to polarized mitochondria and is not suggestive of depolarized or damaged  
951 mitochondria. We pre-labelled mitochondria in hCMEC/D3 and RAW 264.7 cells using MitoT  
952 and isolated EXOs and MVs (D3-MitoT-EXO, D3-MitoT-MV, RAW-MitoT-EXO, and RAW-

953 MitoT-MV) to evaluate if the labelled mitochondria can be transferred to recipient hCMEC/D3  
954 endothelial cells. Brain endothelial cells were treated with the **indicated** amounts of labelled EVs  
955 at doses ranging from 3 – 600 µg total EV protein. At a low dose of 3 µg EV protein, D3-MitoT-  
956 EXO showed no MitoT positive signals up to 72 h whereas D3-MitoT-MV showed punctate  
957 fluorescence at 48 h of post-incubation (**Fig. 4a-c**). Furthermore, we noticed increased  
958 intracellular puncta in D3-MitoT-MV-treated cells with EV protein content ranging from 3 to 24  
959 µg as the incubation times increased from 24 – 72 h. Cells dosed with D3-MitoT-MV from 100  
960 µg up to 600 µg showed punctate signals at all observed time points (24-72 h). However, the  
961 signals were visible in the case of D3-MitoT-EXO only at the 100 µg protein dose at 24 h with  
962 prominent signals noted at 48 h and 72 as well. Nevertheless, there were **noticeable** differences  
963 in the nature of the staining observed with **EXO vs. MV**-treated cells. D3-MitoT-EXO showed  
964 faint/**diffuse** staining at an exposure time of 200 ms despite the higher dose of 100 µg, whereas  
965 the **intracellular puncta-like** staining was brighter and **discrete** in cells treated with D3-MitoT-  
966 MV even at a lower exposure time of 70 ms. The intensity of fluorescent signals was found to be  
967 dependent on the EV protein dose and incubation times.

968  
969 We noted similar observations for RAW-MitoT-EXO and RAW-MitoT-MV at higher EV  
970 protein doses as well as at increasing incubation times from 24 to 72 h (**Fig. S2**). Yet another  
971 striking feature was the fact that both microvesicles, D3-MitoT-MV and RAW-MitoT-MV,  
972 showed fluorescent signals at lower treatment doses within 24 h compared to the exosomes: D3-  
973 MitoT-EXO and RAW-MitoT-EXO, that required a higher amount of protein and increased  
974 amounts of incubation time for detecting MitoT fluorescent signals. However, comparing the  
975 signal intensities, the appearance of fluorescent signals in cells was relatively earlier and more

976 discrete with homotypic D3-MitoT-MV at lower protein contents than those incubated with the  
977 heterotypic RAW-MitoT-MV which showed fluorescent signals later and at longer exposure  
978 times. For instance, cells treated with 100 µg of D3-MitoT-MV showed higher cellular uptake  
979 than those treated with 100 µg of RAW-MitoT-MV 24-, 48-, and 72 h post-incubation. To  
980 summarize, EXOs and MVs derived from MitoT-labelled cells demonstrated [accumulation of](#)  
981 [mitochondria and/or mitochondrial components](#) in the recipient hCMEC/D3 endothelial cells.  
982 [More importantly, the pattern of Mitotracker staining in the recipient cells revealed brighter](#)  
983 [puncta associated with MV transfer compared to the diffuse staining observed in the case of](#)  
984 [EXO-treated cells. The observed differences suggest that MVs are likely](#) more efficient in  
985 transferring mitochondria compared to EXOs [and](#) aligns well with the fact that MVs incorporate  
986 mitochondria during their biogenesis. It is known that mitochondria undergo a series of dynamic  
987 changes, including biogenesis, shape changes and selective degradation and rapid transport along  
988 with cell bodies to extremities [98]. It may well be possible that these MV mitochondria are  
989 functional with their full complement of proteins, lipids, and mitochondrial DNA.

990

991 Although MV-associated mitochondria have also been previously reported [27], recent  
992 reports have demonstrated the presence of mitochondria in exosomes as well [28]. EXOs derived  
993 from airway myeloid-derived regulatory cells from both healthy and asthmatic subjects  
994 transferred mitochondria to T cells, co-localized with the mitochondrial network and regulated  
995 bioenergetics in the recipient T cells [28]. Panfoli *et al.* demonstrated that the EXOs isolated  
996 from new-born infants can produce ATP and consume oxygen with the presence of  
997 electrochemical membrane potential similar to isolated mitochondria [99]. Some mitochondrial  
998 proteins such as voltage-dependent anion channel 1 and adenosine triphosphate synthase subunit

999 alpha were also detected in the exosomal fraction isolated from murine cancer-associated  
1000 fibroblasts and in the serum obtained from adults with Parkinson's disease isolated at 100,000xg  
1001 and tested positive for proteins of endocytic origin [86, 87]. Some studies evaluated the entire  
1002 supernatant fraction of conditioned media or plasma after removal of apoptotic bodies for MV  
1003 studies [100, 101]. Zhang *et al.* used the EVs isolated from plasma deprived of cell debris and  
1004 apoptotic bodies to study the mitochondrial activity. The authors found that the all fractions of  
1005 EVs contained respiring mitochondria, with the highest (99.98%) being in the large-sized EVs (1  
1006 – 6  $\mu\text{m}$ ), intermediate (95.91%) in EVs sized 100 nm – 1  $\mu\text{m}$  and low (62.72%) in small-sized  
1007 EVs < 100 nm [101].  
1008

**a. 24 h incubation**

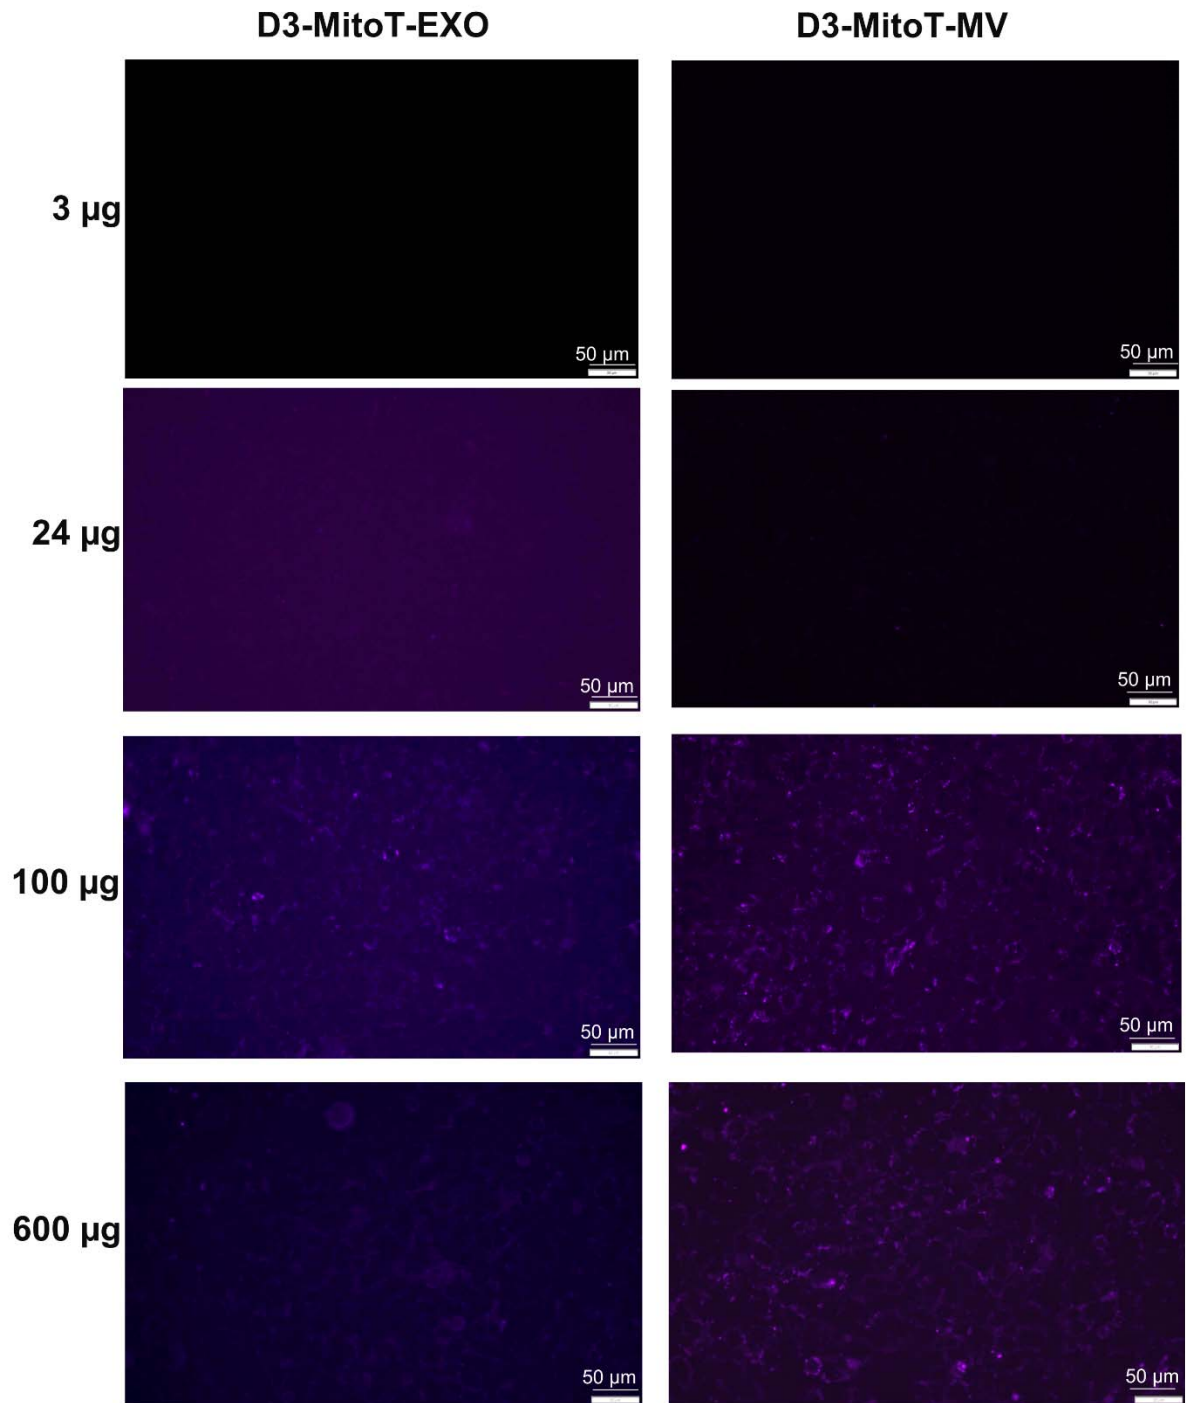

1009

## **b. 48 h incubation**

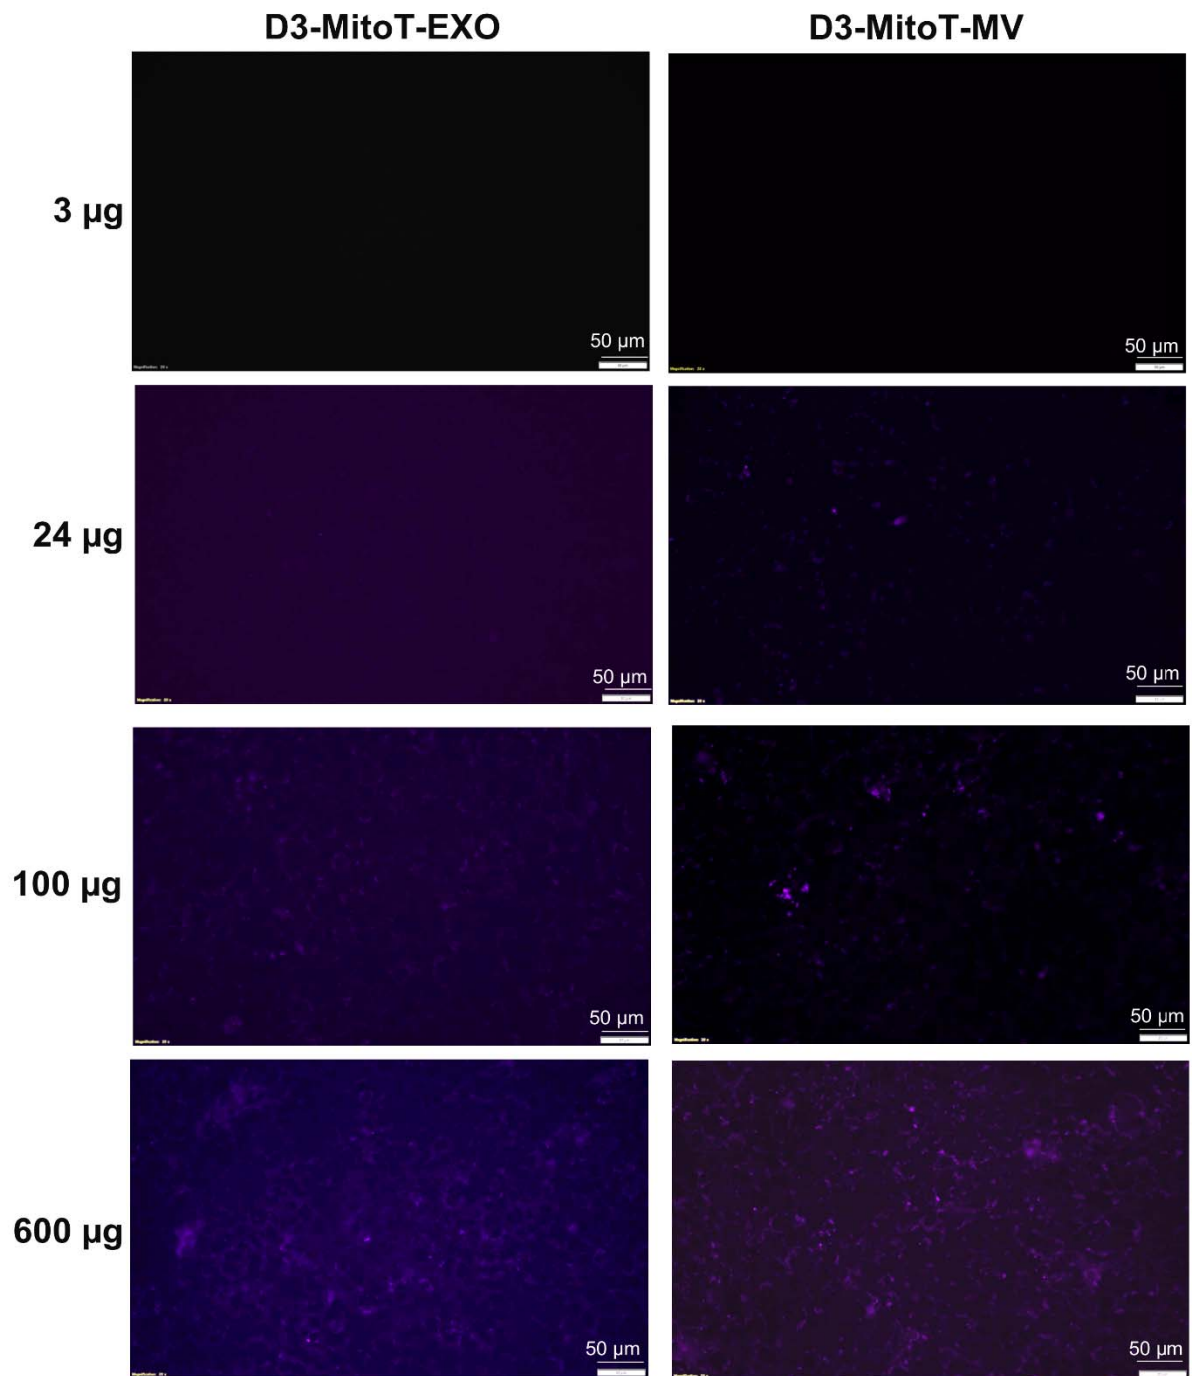

1010



### c. 72 h incubation

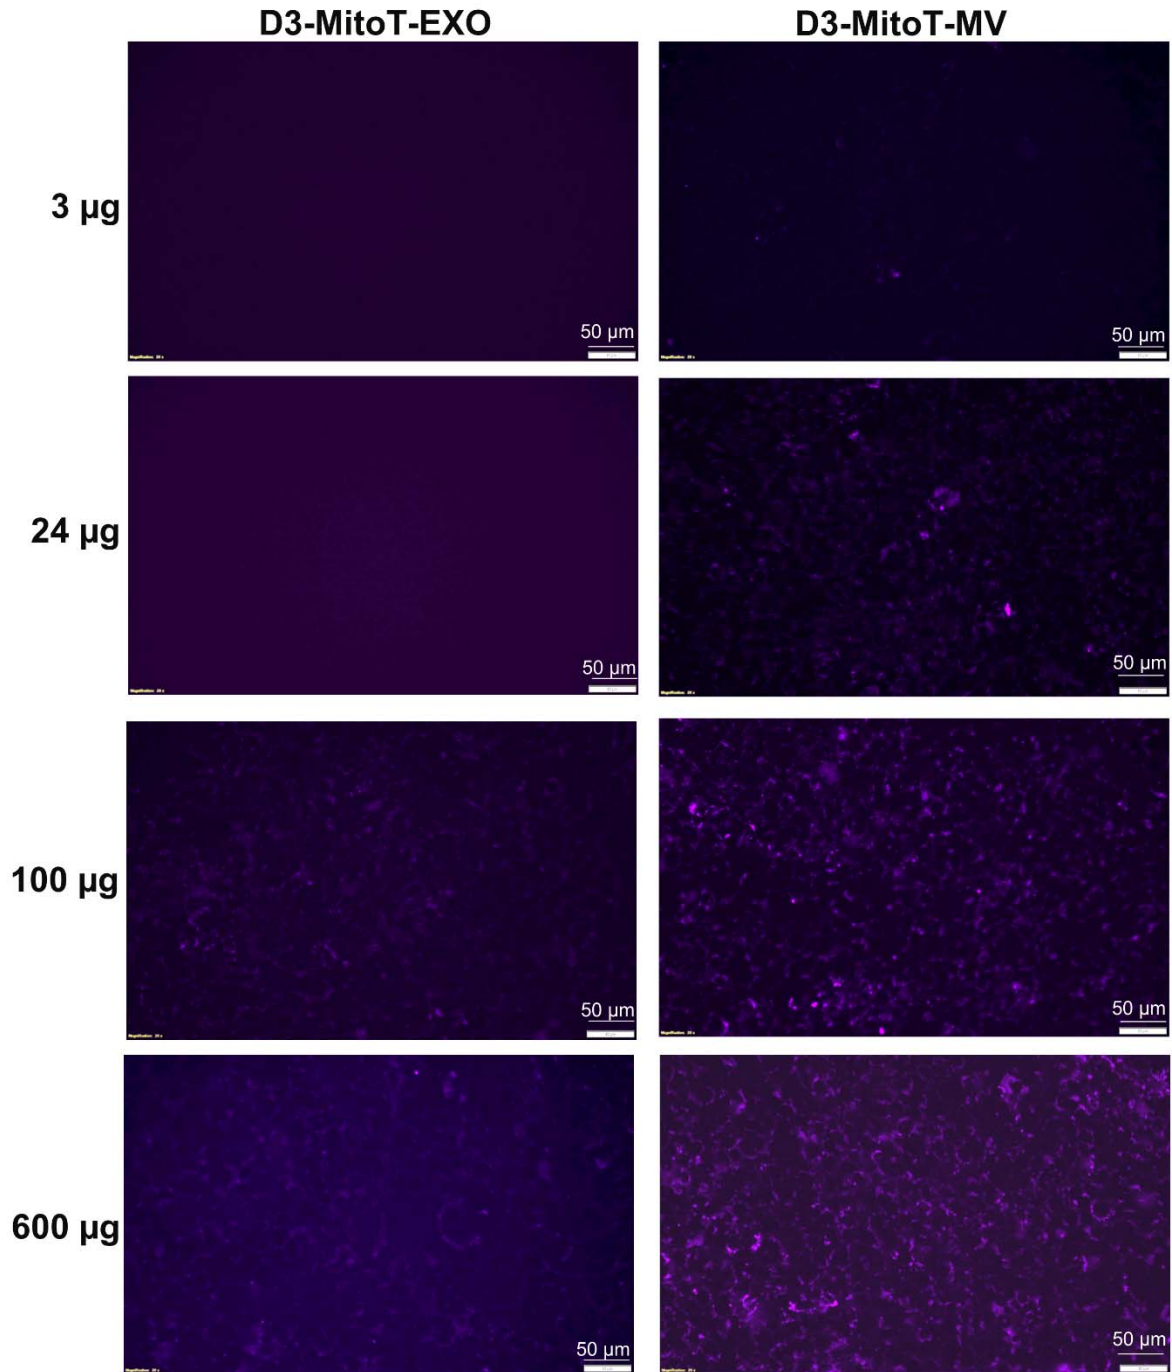

1011  
1012 **Figure 4. Transfer of Mitotracker-labelled mitochondria from hCMEC/D3-derived EVs to**  
1013 **the recipient hCMEC/D3 endothelial cells.** The donor/source hCMEC/D3 endothelial cells  
1014 were stained with MitoTracker Deep-Red (MitoT) (250 nM for 30 min) to specifically label  
1015 polarized mitochondria following which the MitoT-EVs were isolated from conditioned media.

1016 The recipient hCMEC/D3 endothelial cells were treated with D3-MitoT-EXO and D3-MitoT-  
1017 MV at the indicated protein doses and observed under an Olympus IX 73 epifluorescent inverted  
1018 microscope (Olympus, Pittsburgh, PA) under the Cy5 channel settings at 24 h, 48 h and 72 h  
1019 post-treatment. The presented data are representative images from three independent experiments  
1020 (n=4 per experiment). Scale bar = 50  $\mu$ m.  
1021

### 1022 **3.7. Measurement of mitochondrial function using Seahorse analysis**

1023 We wanted to understand if the transfer of mitochondria (**Figs. 4, S2**) affected overall  
1024 mitochondrial function. We treated hypoxic endothelial cultures using EXOs or MVs and  
1025 measured the basal and maximal oxygen consumption rate (OCR) as a measure of mitochondrial  
1026 respiration and extracellular acidification rate (ECAR) as a measure of glycolysis. Seahorse XF  
1027 Analyzer is a sensitive, robust and high-throughput technique [102] to measure mitochondrial  
1028 parameters in cultured cells as well as isolated brain microvessels [43, 102-105]. Cells treated  
1029 with MVs showed a significant, dose-dependent increase in the maximal OCR and ECAR  
1030 compared to untreated cells and cells treated with EXOs (**Fig. 5a**). The basal OCR was also  
1031 increased by 179 and 269% in the groups treated with MVs at doses of 3.4 and 17.1  $\mu$ g of MV  
1032 protein (compared to untreated and EXO-treated cells), respectively. Likewise, we noted 147 and  
1033 224% increases in maximal OCR in the groups treated with MVs at a doses of 3.4 and 17.1  $\mu$ g  
1034 MV protein (compared to untreated and EXO-treated cells), respectively. The transfer of MV-  
1035 mediated mitochondria increased the basal and maximal OCR of the hypoxic BECs (**Fig. 5a**) and  
1036 as a result, the maximal glycolytic capacity also increased (**Fig. 5b**). We noted small, statistically  
1037 non-significant changes in proton leak among the groups suggesting that the mitochondrial  
1038 respiration is linked to ATP production via oxidative phosphorylation. An increase in the proton  
1039 leak would suggest that although oxidative phosphorylation is increased, the mitochondrial  
1040 function is not optimum as protons are leaking across the mitochondrial membrane.

1041 Concomitant with the increases in OCR, the maximum glycolytic capacity of cells treated  
1042 with 17.1  $\mu\text{g}$  of MVs also increased by ca. 200% compared to untreated hypoxic BECs (**Fig. 5b**).  
1043 It has been reported that MVs from the D3 endothelial cell line are selectively enriched with  
1044 mitochondrial proteins compared to the EXO fraction [84]. Our results demonstrated that the  
1045 transfer of MVs but not EXOs result in increased mitochondrial function indicated by the  
1046 increased OCR and ECAR values. This MV-selective mitochondrial transfer is also supported  
1047 the EV-Mitotracker images (**Fig. 4 and S2**) where the MV-treated cells showed a more discrete  
1048 intracellular puncta compared to the somewhat diffuse pattern observed with the EXO-treated  
1049 cells. Furthermore, our western blotting analysis (**Fig. 1g**) also demonstrated the MV were  
1050 enriched with ATP5A protein compared to the EXO fraction. In summary, though published  
1051 reports have reported the general trend of EV (EXO and MV)-mediated mitochondrial transfer  
1052 [27, 28, 99, 101, 106-108], our data unequivocally demonstrates that the MV-mediated  
1053 mitochondrial transfer increases overall mitochondrial function in a dose-dependent manner.

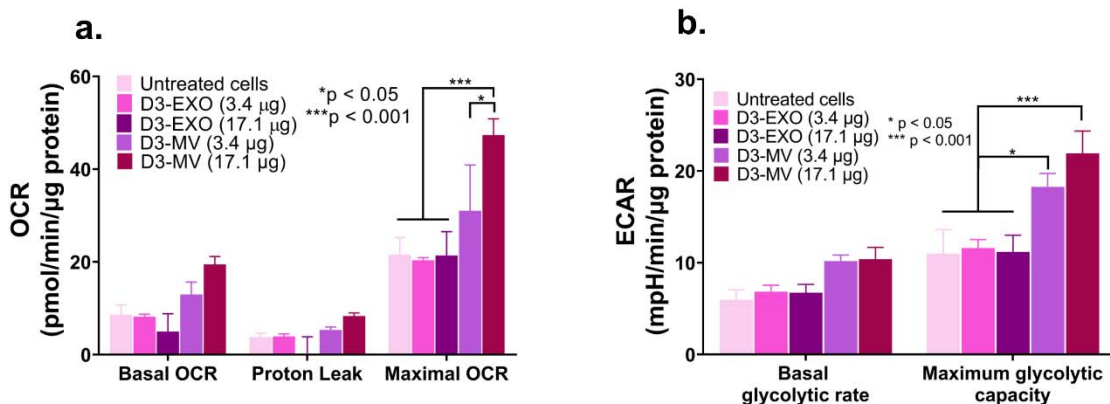

1054  
1055 **Figure 5. MVs increased mitochondrial function in hypoxic brain endothelial cultures.** (a)  
1056 Oxygen consumption and extracellular acidification rates (OCR and ECAR) were measured by  
1057 treating hypoxic hCMEC/D3 cells with the indicated samples in OGD medium. We used a  
1058 standard Mitochondrial Stress Test protocol to measure basal OCR followed by the addition of  
1059 2.5  $\mu\text{mol/L}$  oligomycin A to measure proton leak and 0.7  $\mu\text{mol/L}$  FCCP to measure maximal  
1060 OCR. Basal glycolytic rate was calculated by determining the ECAR that is sensitive to 2-DG

1061 (100 mmol/L). The assay was performed in non-buffered Dulbecco's modified Eagle medium  
1062 supplemented with 25 mmol/L glucose, 1 mM pyruvate, and 2 mmol/L glutamine. All rates were  
1063 normalized to cellular protein content measured using MicroBCA assay. Data are mean  $\pm$  SEM,  
1064  $n = 3$ ,  $*p < 0.05$  and  $***p < 0.001$  as determined using one-way ANOVA Tukey's multiple  
1065 comparisons test.

1066

### 1067 **3.8. Effect of EV delivery on the ATP levels in the ischemic endothelial cells**

1068 It has been reported that depolarized mitochondria were transferred from the mesenchymal stem  
1069 cells to macrophages via MVs and that these mitochondria were repurposed by undergoing  
1070 fusion with the mitochondrial network of macrophages, improving their bioenergetics [27]. Thus,  
1071 it is reasonable to expect that the positive effects of mitochondria-induced increases in  
1072 bioenergetics would be more pronounced in ischemic cells that have impaired mitochondrial  
1073 function. Therefore, we determined the effects of transferring naïve EVs in brain endothelial  
1074 cells subjected to an ischemic attack using an *in vitro* oxygen-glucose deprivation (OGD) model  
1075 of stroke. We used a CellTiter Glo-Luminescent Cell Viability assay (referred to as “ATP assay”  
1076 henceforth) to measure the resulting ATP levels upon EV exposure. We chose the ATP assay to  
1077 determine the effects of EV exposure as it is a rapid and sensitive technique for evaluating the  
1078 cell viability of the treated cells [109, 110] and the ATP readout is directly proportional to the  
1079 number of cells in culture [111]. The cytoplasmic mitochondrial volume of rat brain endothelial  
1080 cells was almost two to four-fold higher compared to the other non-brain endothelial cells (2 to  
1081 5%), suggesting that the brain endothelial cells have a higher metabolic activity [48].  
1082 Additionally, hypoxic conditions lead to disruption of tight junctions and apoptosis in BECs  
1083 further increasing the need for mitochondrial metabolism for endothelial survival [49]. Oxygen-  
1084 glucose deprivation reduces oxidative phosphorylation and induces energy failure [27]. Recovery  
1085 of bioenergetics in cells is indicated by their ability to generate mitochondrial ATP in coupled  
1086 with proton leak and/or generation of reactive oxygen species [27]. We first optimized the

1087 exposure time of cells to determine the reproducibility of simulating OGD-induced cell death in  
 1088 the hCMEC/D3 brain endothelial cells. We determined that a 4 h OGD exposure was sufficient  
 1089 to mediate at least 50% cell death as measured using the ATP assay (**Fig. S3**).

1090  
 1091 We first exposed healthy hCMEC/D3 endothelial cells (cultured under normoxic conditions)  
 1092 to different EV protein doses ranging from 14.6 to 174.5  $\mu\text{g}$  (per 0.32  $\text{cm}^2$ /well in a 96-well  
 1093 plate). These selected doses were equivalent to 50, 100, 200, 400 and 600  $\mu\text{g}$  per 0.85  $\text{cm}^2$  area  
 1094 of 48-well plate that was previously used in the MitoT-EV study (**Fig. 4 and S2**). Seventy-two  
 1095 hours post-incubation with normoxic monolayers, no significant differences were found in the  
 1096 ATP levels (and the resulting cell viabilities) in cells that were treated with both D3- and RAW-  
 1097 EXOs and D3-MV groups at 14.6 and 29.1  $\mu\text{g}$  and compared to the untreated cells (**Fig. 6a**). The  
 1098 cell viabilities however decreased with an increase in the treatment dose of EXO dose from 58.2

1099 to 174.5  $\mu\text{g}$  and the case of D3-MVs, from 29.1  $\mu\text{g}$  and  
 1100 upward. A previous study reported no cytotoxicity of  
 1101 milk-derived EVs up to doses of 200  $\mu\text{g}$  protein/mL in  
 1102 Caco-2 intestinal monolayers since these cells naturally  
 1103 absorb digestive products [112]. Hansen *et al.* observed  
 1104 decreased Caco-2 cell viability when treated with 50  
 1105  $\mu\text{g/mL}$  of Alexa Fluor-labelled EVs isolated from milk  
 1106 after 6 h but the cell viability was regained after 24 h,  
 1107 which however were not confirmed in the successive  
 1108 experiments [113].

1109

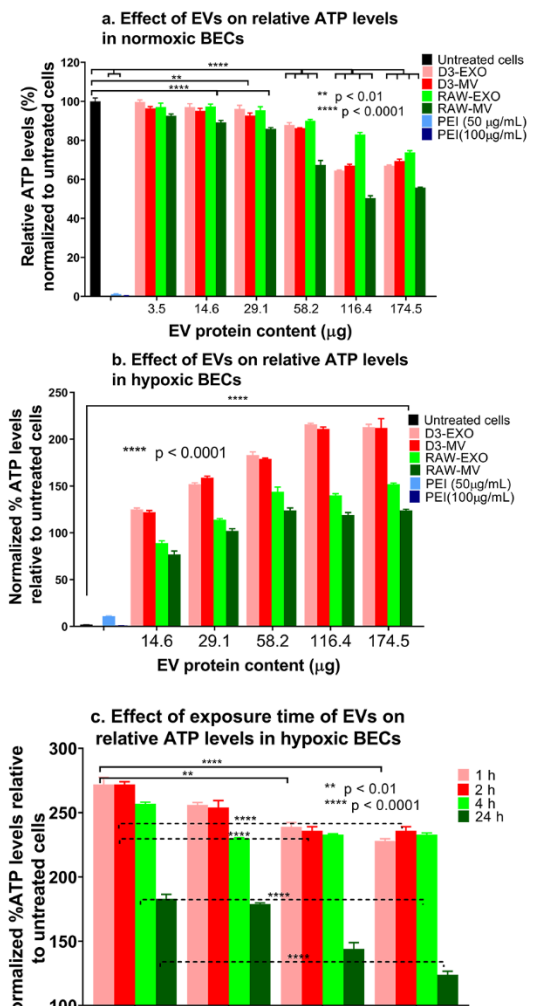

1110 **Figure 6. Effects of EV exposure on the ATP levels of hCMEC/D3 endothelial cells under**  
1111 **normoxic and hypoxic (OGD) conditions.** (a) Normoxic hCMEC/D3 endothelial cells were  
1112 treated with the indicated EV protein content for 72 h. (b) hCMEC/D3 endothelial cells were  
1113 subjected to 4 h of OGD by exposing the cells in a sealed hypoxia chamber (90% N<sub>2</sub>, 5% H<sub>2</sub>, 5%  
1114 CO<sub>2</sub>) and glucose-free media at 37 °C in a humidified incubator. OGD exposed hCMEC/D3  
1115 endothelial cells were treated with the indicated amounts of naïve D3-EVs and RAW-EVs for 24  
1116 h under 21% O<sub>2</sub> in a humidified incubator (normoxic conditions). Untreated OGD cells were  
1117 cultured in glucose-free media under normoxic conditions. (c) Effect of exposure time on the  
1118 resulting ATP levels in hypoxic hCMEC/D3 endothelial cells. Hypoxic monolayers were treated  
1119 with the indicated amounts of EVs for the indicated periods. Untreated OGD cells were cultured  
1120 in glucose-free media 4 h post-OGD under normoxic conditions. Unless indicated otherwise,  
1121 normoxic cells treated with polyethyleneimine (PEI) for 4 h were considered as a positive  
1122 control. In all cases, the effects of treatment were determined using an ATP assay. Data are  
1123 represented as mean  $\pm$  SD (n = 4). Statistical comparisons to the normoxic/hypoxic groups  
1124 were made using one-way ANOVA Bonferroni's multiple comparisons test.  
1125

1126 All types of EVs regardless of parent cell source resulted in increased cellular ATP levels  
1127 relative to control, untreated hypoxic cells under OGD conditions (**Fig. 6b**). The increased  
1128 relative ATP levels were likely indicative of greater cell survival at all tested EVs doses. The  
1129 ATP levels were significantly higher in recipient cells when incubated with all doses of the  
1130 different EVs compared to the control group. Incubation of OGD-exposed endothelial cells with  
1131 D3- and RAW-EVs increased the ATP levels by nearly 100 to 200-fold as a function of the EV  
1132 protein dose. At the same time, no differences were found when the recipient cells were treated  
1133 with D3-EXO and D3-MV. However, the ATP levels of D3-EVs post-incubation were higher  
1134 than the ATP levels of RAW-EVs post-incubation (**Fig. 6b and 6c**). Our results showed that at  
1135 least 14.6  $\mu$ g of total EV protein is required to increase the cellular ATP levels. A similar  
1136 observation was noted when EVs derived from human Wharton's jelly mesenchymal stem cells  
1137 were used to treat OGD-exposed mouse neuroblastoma cells [114]. Another study [115] reported  
1138 that EV doses of 200  $\mu$ g yielded the maximum cell proliferation, while 50  $\mu$ g of EVs was the  
1139 minimal effective dose to increase cell proliferation in neural stem cells under OGD conditions.

1140 Our results further confirmed that EVs can increase cellular ATP levels in a dose-dependent  
1141 manner. A modest increase in ATP levels was observed at the highest protein dose of 116.4  $\mu\text{g}$   
1142 with D3-derived EVs and at doses greater than 58.2  $\mu\text{g}$  with RAW-derived EVs. It is likely that  
1143 at the higher doses, the cells may have shown a reduced uptake with time causing the observed  
1144 plateau effects. A saturation in uptake or intake equivalent to intracellular processing of EVs has  
1145 been reported after 18 h [113] especially in the case of milk-derived EVs [116]. Saari *et al.* had  
1146 similar observations with paclitaxel-loaded EVs which showed increased toxicity with an  
1147 increase in concentrations in LNCaP and PC-3 cell lines and their respective EVs. However,  
1148 after incubating cells with  $10^9$  paclitaxel loaded-EVs/mL, a saturation point with maximum  
1149 cytotoxic effect was reached at 24 h [117]. Meanwhile, HEK293T-derived EVs showed early  
1150 uptake within 2 h with a peak at 12 h and then decreased up to 24 h. The lower values may also  
1151 be due to the exocytosis of EVs after 24 h [116].

1152  
1153 The protective effects of the EVs appeared to reach their maximum at about 2 h post-  
1154 incubation (**Fig. 6c**) in hypoxic cultures. As described in the above paragraph, EV uptake also  
1155 shows a saturation and a time-dependent uptake. Hansen *et al.* observed a plateau in EV uptake  
1156 18 h post-exposure [113]. The saturation effects are likely due to the active, energy-dependent  
1157 endocytic uptake of EVs [118-120] and not via passive membrane fusion, which caused an  
1158 inhibition in the uptake of EVs [121]. **Noteworthy**, the resulting ATP levels were consistently  
1159 higher with D3-derived EVs compared to the RAW-derived EVs suggesting that under cell  
1160 duress, the recipient D3 brain endothelial cells preferentially internalized the homotypic D3-  
1161 derived EVs as opposed to the heterotypic RAW macrophage-derived EVs (**Fig. 6b**).

1162

1163 ATP is the most common intracellular energy source and importantly, in high energy  
1164 consuming-tissues like the heart and brain, mitochondria produce 80-90% of the cell's ATP  
1165 [122]. Depletion of ATP levels is thought to prevent efficient post-ischemic repair [122]. The  
1166 EV-mediated ATP increases suggest that this may be a promising approach to decrease acute cell  
1167 death and activate ischemic repair pathways to limit post-stroke damage. Mitochondrial transfer  
1168 helps to rescue metabolism and protects the neurons and other brain cells from tissue injury.  
1169 Brain endothelial cells also take up extracellular mitochondria derived from endothelial  
1170 progenitor cells under OGD conditions [123]. EXOs are also reported to contain mitochondria or  
1171 mtDNA which can be transferred across distant cells [27, 28, 99, 106-108]. Mitochondrial DNA  
1172 and intracellular ATP were upregulated in the oxygen-glucose deprived endothelial progenitor  
1173 cells when treated with endothelial progenitor cell-derived mitochondria [123]. Mitochondrial  
1174 DNA can also be imported into mitochondria irrespective of the mitochondrial membrane  
1175 potential [124]. The mammalian mtDNA is essential to couple respiration to ATP synthesis and  
1176 oxidative photophosphorylation [125]. It also encodes functional RNAs in intramitochondrial  
1177 translation.

1178

1179 Transfer of mtDNA can be of crucial significance in increasing the mitochondrial load in the  
1180 recipient cells. The mtDNA can be imported into the mitochondria once it reaches the cytosol of  
1181 the recipient cell [106]. EVs derived from cardiomyocytes containing chromosomal DNA were  
1182 transferred to the nuclei or cytosol of the recipient fibroblasts [126]. Transfer of intact/full  
1183 mitochondria can also import mtDNA and provide a template for synthesis of DNA and RNA  
1184 [124]. Adipose stem cell-derived EXOs reverted mitochondrial dysfunction by contributing  
1185 complex 1 to the electron transfer system and coupling efficiency as well as by restoring



1186 mitochondrial membrane potential [127]. Mesenchymal stem cell-derived EXO containing  
1187 glycolytic enzymes restored the glycolysis and ATP levels with reduced oxidative stress in mice  
1188 subjected to 30 min of ischemia followed by reperfusion [128] and also increased the levels of  
1189 extracellular ATP [129]. Our data and these findings thus suggest that EVs-derived from D3  
1190 endothelial and RAW cells may increase the cellular bioenergetics of brain endothelial cells in an  
1191 animal model of ischemic stroke through mitochondrial transfer, providing an extracellular  
1192 source of glycolytic enzymes and/or the transfer of mtDNA.

1193

### 1194 **3.9. Uptake of MitoT-EVs by cortical and granule neurons in mice acute brain cortical** 1195 **and hippocampal slices**

1196 It is known that both brain endothelial and neuronal cultures equally and rapidly respond to  
1197 ischemic injury [130, 131] and therefore, we wanted to understand the effects of EVs on neurons  
1198 (**Figure 7**). Injury to a specific region of the brain microvasculature (composed of endothelial  
1199 cells lining the BBB) can also damage adjacent neurons [130]. We used acute brain slices as an  
1200 *ex vivo* model to determine if the EVs show uptake into the neurons in cortical and hippocampal  
1201 slices. Acute brain slices preserve the natural cytoarchitecture and are a robust model to study the  
1202 detailed cellular, molecular and circuitry level analysis of neuronal function [132]. Cortical slices  
1203 obtained from non-surgical control mice were incubated in D3-MitoT-EVs for 2 h at 37 °C. In  
1204 slices incubated with D3-MitoT-MV, we observed a punctate intracellular staining within  
1205 neurons and vascular staining in both the cortical (**Fig. 7a**) and hippocampal (dentate gyrus, **Fig.**  
1206 **7b**) slices. Analysis of mean intensity normalized to average control, untreated slices show an  
1207 increase in D3-MitoT-MV intensity in the cortex (**Fig. 7c**), increasing from  $1.1 \pm 0.2$  in control  
1208 slices to  $2.5 \pm 0.6$  in MV treated slices ( $p < 0.1$ ,  $n = 4$ ). No appreciable increase was detected in D3-

1209 MitoT-EXO treated hippocampal slices,  $1.3 \pm 0.3$  (n=4). In the D3-MitoT-EXO and control  
1210 conditions, we found similar levels of nonspecific punctate staining in both brain regions (**Fig.**  
1211 **7a, 7b**). Similarly, analysis of mean intensity normalized to average control levels show an  
1212 increase in D3-MitoT-MV intensity in the hippocampus (**Fig. 7d**), increasing from  $1.0 \pm 0.2$  in  
1213 control slices to  $1.7 \pm 0.4$  in MV-treated slices ( $p < 0.1$ , n=4). No appreciable increase was detected  
1214 in D3-MitoT-EXO treated hippocampal slices,  $1.5 \pm 0.7$  (n=4). These results suggest that MVs but  
1215 not EXOs transfer polarized mitochondria to neuronal and endothelial cells in cortical and  
1216 hippocampal brain slices. These results align well with the MV-mediated mitochondrial transfer  
1217 into endothelial cultures (**Figures 4 and S2**) and the selective MV-mediated increases in  
1218 mitochondrial function (**Figure 5**).

1219

1220      Although these images were obtained from healthy mice, the potential of using EV and MVs

1221 to increase cellular energy levels in injured neurons is intriguing and has significant implications

1222 in treating ischemic  
1223 injury *in vivo*. Neurons  
1224 can be injured due to  
1225 oxidative stress and  
1226 inflammation as a  
1227 result of cell death  
1228 following ischemia  
1229 reperfusion injury. A  
1230 recent report  
1231 demonstrated that  
1232 mitochondrial transfer  
1233 from mesenchymal  
1234 stem cells co-cultured  
1235 with mice primary  
1236 neurons rescued the  
1237 H<sub>2</sub>O<sub>2</sub>-injured neurons  
1238 and improved  
1239 metabolism [133].  
1240 Seahorse analysis  
1241 revealed that the  
1242 mitochondrial  
1243 respiratory parameters  
1244 such as basal

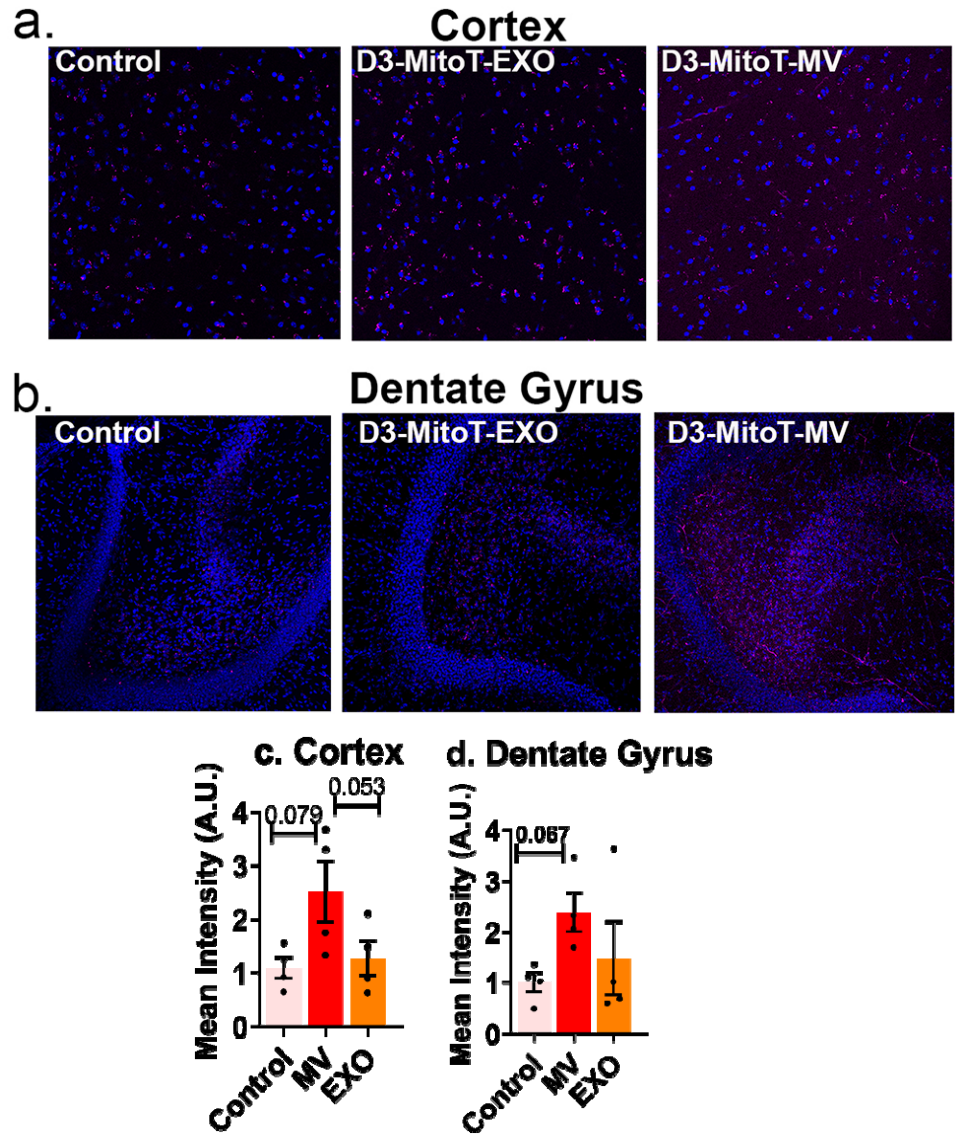

**Figure 7. Uptake of MitoT-EVs by acute brain slices.** Acute cortical and hippocampal slices from mice subjected to sham middle cerebral artery occlusion procedure were left either untreated (control) or incubated in 50  $\mu\text{g}/\text{mL}$  of D3-MitoT-EXO or D3-MitoT-MV for 2 h at 37  $^{\circ}\text{C}$ . Slices were fixed, counterstained with Hoechst 33258 (blue), and visualized on a confocal microscope. Intracellular punctate staining within neurons (magenta) and vascular staining were evident in slices from the cortex (a) and dentate gyrus region of the hippocampus (b) in the D3-MitoT-MV treated condition. The control and D3-MitoT-EXO conditions exhibited similar levels of nonspecific staining in both regions (a and b). Mean intensity values were normalized to control slices and statistical analysis was done using GraphPad Prism 9.1.2 software (c and d).

1245 respiratory rate, spare respiratory capacity, ATP production and proton leak in the injured  
1246 neurons were significantly improved upon mitochondrial transfer [133]. Impaired and  
1247 depolarized mitochondria result in decreased ATP, increased reactive oxygen species and  
1248 calcium overloading which opens up the membrane permeability transition pore releasing  
1249 cytochrome C and eventually leads to apoptosis. Mitochondrial fusion with the injured cells  
1250 causes rapid exchange of mitochondrial DNA, mitochondrial membranes and mitochondrial  
1251 metabolites within mitochondrial network and repair the damaged ones. Thus, mitochondrial  
1252 transfer increases the chances of neuronal cell survival upon ischemic attack.

1253

### 1254 **3.10. Delivery of ATP5A protein via EV/ATP5A complexes to hypoxic BECs**

1255 It is known that D3-derived microvesicles were highly enriched in ATP5A1 [26, 84], a subunit  
1256 of the mitochondrial ATP synthase protein that catalyzes ATP synthesis [134]. From an  
1257 engineering perspective, we tested if we could load exogenous ATP5A into EVs to further  
1258 buttress its capability to deliver ATP5A protein. ATP5A1 is a mitochondrial [135], nucleus-  
1259 encoded protein [136] biosynthesized by the mitochondria to produce ATP from ADP in  
1260 presence of a proton gradient. Reduced supply of blood and oxygen during ischemia causes an  
1261 imbalance of the energy production and depletes the high energy phosphates, ATP. Direct  
1262 infusion of exogenous ATP is not possible due to its anionic charge and hydrophilic nature  
1263 which forbids delivery through the cellular membrane. Moreover, the systemic half-life of ATP  
1264 is short (< 40s) due to degradation by ectonucleotidases [137]. Hypoxia/reperfusion of cells  
1265 decreases the ATP5A/ mitochondrial-encoded protein cytochrome-c oxidase I ratio [136] and  
1266 ATP5A mRNA levels [138] further exacerbating ischemic injury.

1267

1268 ATP5A is a large cationic protein (MW 59.8 kD, pI 9.2) that cannot diffuse or penetrate  
1269 through the cell membrane. ATP5A contains 68 cationic residues (arginine and lysine) at a  
1270 physiological pH of 7.4 that can form a complex with the negatively-charged EV membranes via  
1271 electrostatic interactions. The formation of the EV/ATP5A complexes was confirmed using a  
1272 native polyacrylamide gel (**Fig. 8a**). Coomassie dye stained both the ATP5A and EV proteins.  
1273 Under native PAGE conditions, ATP5A is slightly positively charged at the running buffer pH of  
1274 8.3. On the other hand, the negatively-charged EVs ranging with a surface zeta potential of -4  
1275 and -12 mV (**Fig. 8a**) will migrate towards the anode. While the cationic free ATP5A protein  
1276 stayed at the loading point, EV protein: ATP5A complexes at a weight/weight ratio (w/w) of 5:1  
1277 resulted in the retention of the formed complexes at the loading point while the excess free EVs  
1278 slightly migrated towards the anode (+) confirming the neutralization of protein charges by EV  
1279 membranes. It should be noted that this pattern of migration of EV/protein complexes was  
1280 consistent with previously reported findings on EV complexes with a similar cationic protein,  
1281 brain-derived neurotrophic factor [21].

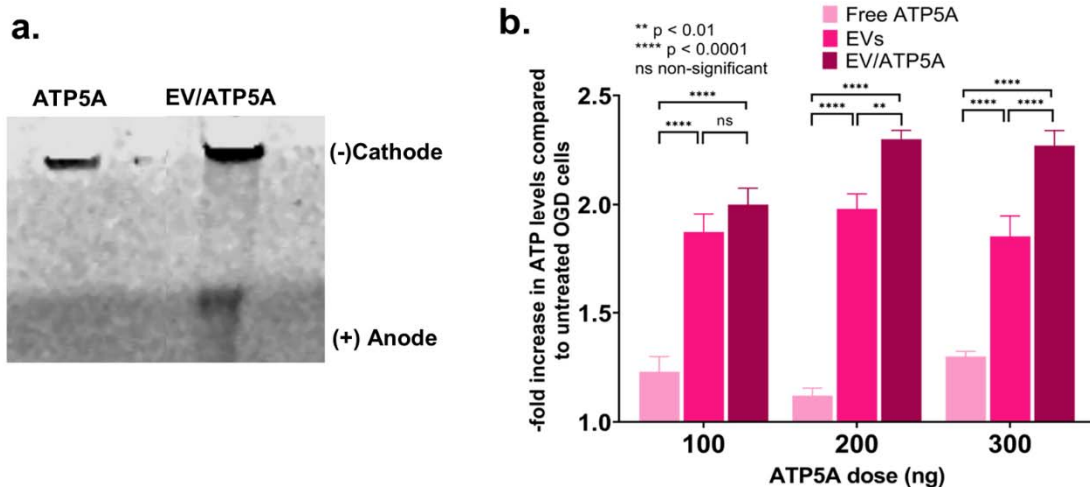

1282

1283 **Figure 8. Formation of EV/ATP5A complexes confirmed using native gel electrophoresis.**  
1284 (a) Native PAGE analysis of the EV/ATP5A complexes. 0.5  $\mu$ g of the indicated samples were  
1285 electrophoresed in a 4-10% of native PAGE gel and the bands were visualized using Bio-safe  
1286 Coomassie dye. (b) Confluent hCMEC/D3 cells (16,000/well) in 96-well plates were exposed to  
1287 OGD conditions for 4 h following which the media was replaced with 100  $\mu$ L of the indicated  
1288 samples. Cells were incubated for 24 h and washed once in 1x PBS prior to measuring cellular  
1289 ATP levels using a Cell Glo luminescence assay. Data represent average  $\pm$  SD (n=4).  
1290

1291 The effect of EV/ATP5A complexes on the resulting ATP levels in OGD-exposed  
1292 hCMEC/D3 is shown in **Fig. 8b**. Incubation of free ATP5A1 with endothelial cells exposed to  
1293 OGD increased the cellular ATP levels. However, increasing the dose of free ATP5A1 from 100  
1294 to 300 ng did not result in a significant increase in the ATP levels that almost remained constant  
1295 regardless of the ATP5A dose. As observed and discussed in section 3.8., naïve EVs increased  
1296 the ATP levels of the endothelial cells exposed to OGD. However, the increase in the ATP levels  
1297 is not significant with an increase in the naïve EV doses (500, 1000 and 1500 ng) added in  
1298 amounts equivalent to those in EV/ATP5A complexes. The EV/ATP5A complexes containing  
1299 100 ng of ATP5A also did not result in a significant increase in the ATP levels compared to cells  
1300 treated with naïve EVs. However, the ATP levels increased significantly in cells treated with  
1301 EV/ATP5A complexes containing 200 ng of ATP5A protein. A further increase in the ATP5A  
1302 dose to 300 ng in the EV/ATP5A complexes showed elevated ATP levels. Our observations  
1303 point at a trend that higher ATP5A protein doses (200 and 300 ng) delivered via EVs increased  
1304 ATP levels by ca. 2.3-fold compared to about 1.9-fold in the case of naïve EVs.

1305

#### 1306 **4. Conclusions**

1307 We suggest that the natural overlap of exosomal biogenesis and the intracellular trafficking  
1308 pathways of DNA-EVs may explain the greater DNA loading in smaller EXOs compared to the



1309 larger MVs, in contrast to previously reported findings. [Gene ontology and pathway enrichment](#)  
1310 [analyses revealed that EVs overexpressed glycolytic genes and pathways.](#) We have  
1311 demonstrated, for the first time, that homotypic, endothelial-derived EVs, result in a greater  
1312 extent of mitochondrial transfer to the recipient's brain endothelial cells and resulting ATP  
1313 increases, compared to heterotypic, macrophage-derived EVs. [Transfer of microvesicles, but not](#)  
1314 [exosomes, resulted in increased mitochondrial functions in the recipient cells.](#) We have also  
1315 demonstrated [microvesicle-mediated mitochondrial transfer to neurons in acute brain cortical and](#)  
1316 [hippocampal slices.](#) Our findings suggest that EV carriers have immense potential to increase  
1317 cellular- and mitochondrial bioenergetics in the endothelial cells lining the BBB [and neurons.](#)  
1318 [Therefore, EVs are attractive drugs](#) for the treatment of not only ischemic stroke but also for  
1319 treating brain disorders wherein the permeability of BBB is altered.

1320

#### 1321 **Conflicts of interest**

1322 There are no conflicts of interest to declare.

1323

#### 1324 **Funding**

1325 This work was supported via start-up funds for the Manickam laboratory from Duquesne  
1326 University (DU) and a [2018 Faculty Development Fund \(Office of Research, DU\)](#) to the PI. The  
1327 proteomics study was conducted at the UPMC Hillman Cancer Center Proteomics Facility  
1328 supported in part by award P30CA047904. We would like to acknowledge the  
1329 Neurodegenerative Undergraduate Research Experience (NURE) R25NS100118 for funding  
1330 DXD.

1331

## 1332 **Acknowledgments**

1333 The authors are grateful to Dr. Rehana Leak (DU) for the inspiring discussions. The authors are  
1334 thankful to Mr. Tarun Bhatia in the Leak Lab for technical assistance and Dr. Jelena Janjic for  
1335 allowing the use of Malvern Zetasizer Nano. The authors are also thankful to the Biological  
1336 Sciences Department of Duquesne University for Equipment Support and the Biomedical Mass  
1337 Spectrometry Center, University of Pittsburgh School of Medicine for the proteomics study.

## 1338 **Appendix A. Supplementary data**

1339 Supplementary data related to this article can be found in the accompanying Word file.

1340

## 1341 **5. References**

- 1342 [1] K. O'Brien, K. Breyne, S. Ughetto, L.C. Laurent, X.O. Breakefield, RNA delivery by  
1343 extracellular vesicles in mammalian cells and its applications, *Nature Reviews Molecular Cell*  
1344 *Biology* 21(10) (2020) 585-606.
- 1345 [2] P. Wu, B. Zhang, D.K.W. Ocansey, W. Xu, H. Qian, Extracellular vesicles: A bright star of  
1346 nanomedicine, *Biomaterials* 269 (2021) 120467.
- 1347 [3] O.G. de Jong, S.A.A. Kooijmans, D.E. Murphy, L. Jiang, M.J.W. Evers, J.P.G. Sluijter, P.  
1348 Vader, R.M. Schiffelers, Drug Delivery with Extracellular Vesicles: From Imagination to  
1349 Innovation, *Accounts of Chemical Research* 52(7) (2019) 1761-1770.
- 1350 [4] O.M. Elsharkasy, J.Z. Nordin, D.W. Hagey, O.G. de Jong, R.M. Schiffelers, S.E.L.  
1351 Andaloussi, P. Vader, Extracellular vesicles as drug delivery systems: Why and how?, *Advanced*  
1352 *Drug Delivery Reviews* 159 (2020) 332-343.
- 1353 [5] J. Wang, D. Chen, E.A. Ho, Challenges in the development and establishment of exosome-  
1354 based drug delivery systems, *Journal of Controlled Release* 329 (2021) 894-906.
- 1355 [6] S.A.A. Kooijmans, O.G. de Jong, R.M. Schiffelers, Exploring interactions between  
1356 extracellular vesicles and cells for innovative drug delivery system design, *Adv Drug Deliv Rev*  
1357 173 (2021) 252-278.
- 1358 [7] M. Schulz-Siegmund, A. Aigner, Nucleic acid delivery with extracellular vesicles, *Advanced*  
1359 *Drug Delivery Reviews* 173 (2021) 89-111.
- 1360 [8] P. Escudé Martinez de Castilla, L. Tong, C. Huang, A.M. Sofias, G. Pastorin, X. Chen, G.  
1361 Storm, R.M. Schiffelers, J.-W. Wang, Extracellular vesicles as a drug delivery system: A  
1362 systematic review of preclinical studies, *Advanced Drug Delivery Reviews* 175 (2021) 113801.
- 1363 [9] S. El Andaloussi, I. Mäger, X.O. Breakefield, M.J.A. Wood, Extracellular vesicles: biology  
1364 and emerging therapeutic opportunities, *Nature Reviews Drug Discovery* 12 (2013) 347.
- 1365 [10] G. Raposo, W. Stoorvogel, Extracellular vesicles: exosomes, microvesicles, and friends, *J*  
1366 *Cell Biol* 200(4) (2013) 373-83.

- 1367 [11] P. Vader, E.A. Mol, G. Pasterkamp, R.M. Schiffelers, Extracellular vesicles for drug  
1368 delivery, *Advanced Drug Delivery Reviews* 106 (2016) 148-156.
- 1369 [12] D. Buschmann, V. Mussack, J.B. Byrd, Separation, characterization, and standardization of  
1370 extracellular vesicles for drug delivery applications, *Advanced Drug Delivery Reviews* 174  
1371 (2021) 348-368.
- 1372 [13] M. Yáñez-Mó, P.R.M. Siljander, Z. Andreu, A.B. Zavec, F.E. Borràs, E.I. Buzas, K. Buzas,  
1373 E. Casal, F. Cappello, J. Carvalho, E. Colás, A. Cordeiro-da Silva, S. Fais, J.M. Falcon-Perez,  
1374 I.M. Ghobrial, B. Giebel, M. Gimona, M. Graner, I. Gursel, M. Gursel, N.H.H. Heegaard, A.  
1375 Hendrix, P. Kierulf, K. Kokubun, M. Kosanovic, V. Kralj-Iglic, E.-M. Krämer-Albers, S.  
1376 Laitinen, C. Lässer, T. Lener, E. Ligeti, A. Linē, G. Lipps, A. Llorente, J. Lötvall, M. Manček-  
1377 Keber, A. Marcilla, M. Mittelbrunn, I. Nazarenko, E.N.M. Nolte-'t Hoen, T.A. Nyman, L.  
1378 O'Driscoll, M. Olivan, C. Oliveira, É. Pállinger, H.A. Del Portillo, J. Reventós, M. Rigau, E.  
1379 Rohde, M. Sammar, F. Sánchez-Madrid, N. Santarém, K. Schallmoser, M.S. Ostendorf, W.  
1380 Stoorvogel, R. Stukelj, S.G. Van der Grein, M.H. Vasconcelos, M.H.M. Wauben, O. De Wever,  
1381 Biological properties of extracellular vesicles and their physiological functions, *Journal of*  
1382 *extracellular vesicles* 4 (2015) 27066-27066.
- 1383 [14] G. van Niel, G. D'Angelo, G. Raposo, Shedding light on the cell biology of extracellular  
1384 vesicles, *Nature Reviews Molecular Cell Biology* 19(4) (2018) 213-228.
- 1385 [15] T.-T. Tang, B. Wang, L.-L. Lv, B.-C. Liu, Extracellular vesicle-based Nanotherapeutics:  
1386 Emerging frontiers in anti-inflammatory therapy, *Theranostics* 10(18) (2020) 8111-8129.
- 1387 [16] W. Meng, C. He, Y. Hao, L. Wang, L. Li, G. Zhu, Prospects and challenges of extracellular  
1388 vesicle-based drug delivery system: considering cell source, *Drug Deliv* 27(1) (2020) 585-598.
- 1389 [17] S. Busatto, A. Pham, A. Suh, S. Shapiro, J. Wolfram, Organotropic drug delivery: Synthetic  
1390 nanoparticles and extracellular vesicles, *Biomedical microdevices* 21(2) (2019) 46.
- 1391 [18] S. Walker, S. Busatto, A. Pham, M. Tian, A. Suh, K. Carson, A. Quintero, M. Lafrence, H.  
1392 Malik, M.X. Santana, J. Wolfram, Extracellular vesicle-based drug delivery systems for cancer  
1393 treatment, *Theranostics* 9(26) (2019) 8001-8017.
- 1394 [19] A. Nagelkerke, M. Ojansivu, L. van der Koog, T.E. Whittaker, E.M. Cunnane, A.M. Silva,  
1395 N. Dekker, M.M. Stevens, Extracellular vesicles for tissue repair and regeneration: Evidence,  
1396 challenges and opportunities, *Advanced Drug Delivery Reviews* 175 (2021) 113775.
- 1397 [20] A. D'Souza, K.M. Dave, R.A. Stetler, D.S. Manickam, Targeting the blood-brain barrier for  
1398 the delivery of stroke therapies, *Advanced Drug Delivery Reviews* (2021).
- 1399 [21] D. Yuan, Y. Zhao, W.A. Banks, K.M. Bullock, M. Haney, E. Batrakova, A.V. Kabanov,  
1400 Macrophage exosomes as natural nanocarriers for protein delivery to inflamed brain,  
1401 *Biomaterials* 142 (2017) 1-12.
- 1402 [22] L. Alvarez-Erviti, Y. Seow, H. Yin, C. Betts, S. Lakhali, M.J.A. Wood, Delivery of siRNA  
1403 to the mouse brain by systemic injection of targeted exosomes, *Nat Biotech* 29(4) (2011) 341-  
1404 345.
- 1405 [23] M. Kanada, M.H. Bachmann, J.W. Hardy, D.O. Frimannson, L. Bronsart, A. Wang, M.D.  
1406 Sylvester, T.L. Schmidt, R.L. Kaspar, M.J. Butte, A.C. Matin, C.H. Contag, Differential fates of  
1407 biomolecules delivered to target cells via extracellular vesicles, *Proceedings of the National*  
1408 *Academy of Sciences* 112(12) (2015) E1433.
- 1409 [24] M. Kanada, B.D. Kim, J.W. Hardy, J.A. Ronald, M.H. Bachmann, M.P. Bernard, G.I. Perez,  
1410 A.A. Zarea, T.J. Ge, A. Withrow, S.A. Ibrahim, V. Toomajian, S.S. Gambhir, R. Paulmurugan,  
1411 C.H. Contag, Microvesicle-Mediated Delivery of Minicircle DNA Results in Effective Gene-  
1412 Directed Enzyme Prodrug Cancer Therapy, *Mol Cancer Ther* 18(12) (2019) 2331-2342.

- 1413 [25] T.N. Lamichhane, R.S. Raiker, S.M. Jay, Exogenous DNA Loading into Extracellular  
1414 Vesicles via Electroporation is Size-Dependent and Enables Limited Gene Delivery, *Molecular*  
1415 *Pharmaceutics* 12(10) (2015) 3650-3657.
- 1416 [26] K.M. Dave, W. Zhao, C. Hoover, A. D'Souza, S.M. D, Extracellular Vesicles Derived from  
1417 a Human Brain Endothelial Cell Line Increase Cellular ATP Levels, *AAPS PharmSciTech* 22(1)  
1418 (2021) 18.
- 1419 [27] D.G. Phinney, M. Di Giuseppe, J. Njah, E. Sala, S. Shiva, C.M. St Croix, D.B. Stolz, S.C.  
1420 Watkins, Y.P. Di, G.D. Leikauf, J. Kolls, D.W.H. Riches, G. Deiluiis, N. Kaminski, S.V.  
1421 Boregowda, D.H. McKenna, L.A. Ortiz, Mesenchymal stem cells use extracellular vesicles to  
1422 outsource mitophagy and shuttle microRNAs, *Nat Commun* 6 (2015) 8472-8472.
- 1423 [28] K.P. Hough, J.L. Trevor, J.G. Strenkowski, Y. Wang, B.K. Chacko, S. Tousif, D. Chanda,  
1424 C. Steele, V.B. Antony, T. Dokland, X. Ouyang, J. Zhang, S.R. Duncan, V.J. Thannickal, V.M.  
1425 Darley-Usmar, J.S. Deshane, Exosomal transfer of mitochondria from airway myeloid-derived  
1426 regulatory cells to T cells, *Redox Biol* 18 (2018) 54-64.
- 1427 [29] M.N. Islam, S.R. Das, M.T. Emin, M. Wei, L. Sun, K. Westphalen, D.J. Rowlands, S.K.  
1428 Quadri, S. Bhattacharya, J. Bhattacharya, Mitochondrial transfer from bone-marrow-derived  
1429 stromal cells to pulmonary alveoli protects against acute lung injury, *Nat Med* 18(5) (2012) 759-  
1430 765.
- 1431 [30] E. Russo, H. Nguyen, T. Lippert, J. Tuazon, C.V. Borlongan, E. Napoli, Mitochondrial  
1432 targeting as a novel therapy for stroke, *Brain Circ* 4(3) (2018) 84-94.
- 1433 [31] C. Théry, K.W. Witwer, E. Aikawa, M.J. Alcaraz, J.D. Anderson, R. Andriantsitohaina, A.  
1434 Antoniou, T. Arab, F. Archer, G.K. Atkin-Smith, D.C. Ayre, J.-M. Bach, D. Bachurski, H.  
1435 Baharvand, L. Balaj, S. Baldacchino, N.N. Bauer, A.A. Baxter, M. Bebawy, C. Beckham, A.  
1436 Bedina Zavec, A. Benmoussa, A.C. Berardi, P. Bergese, E. Bielska, C. Blenkins, S. Bobis-  
1437 Wozowicz, E. Boilard, W. Boireau, A. Bongiovanni, F.E. Borràs, S. Bosch, C.M. Boulanger, X.  
1438 Breakefield, A.M. Breglio, M.Á. Brennan, D.R. Brigstock, A. Brisson, M.L.D. Broekman, J.F.  
1439 Bromberg, P. Bryl-Górecka, S. Buch, A.H. Buck, D. Burger, S. Busatto, D. Buschmann, B.  
1440 Bussolati, E.I. Buzás, J.B. Byrd, G. Camussi, D.R.F. Carter, S. Caruso, L.W. Chamley, Y.-T.  
1441 Chang, C. Chen, S. Chen, L. Cheng, A.R. Chin, A. Clayton, S.P. Clerici, A. Cocks, E. Cocucci,  
1442 R.J. Coffey, A. Cordeiro-da-Silva, Y. Couch, F.A.W. Coumans, B. Coyle, R. Crescitelli, M.F.  
1443 Criado, C. D'Souza-Schorey, S. Das, A. Datta Chaudhuri, P. de Candia, E.F. De Santana, O. De  
1444 Wever, H.A. del Portillo, T. Demaret, S. Deville, A. Devitt, B. Dhondt, D. Di Vizio, L.C.  
1445 Dieterich, V. Dolo, A.P. Dominguez Rubio, M. Dominici, M.R. Dourado, T.A.P. Driedonks,  
1446 F.V. Duarte, H.M. Duncan, R.M. Eichenberger, K. Ekström, S. El Andaloussi, C. Elie-Caille, U.  
1447 Erdbrügger, J.M. Falcón-Pérez, F. Fatima, J.E. Fish, M. Flores-Bellver, A. Försönits, A. Frelet-  
1448 Barrant, F. Fricke, G. Fuhrmann, S. Gabrielsson, A. Gámez-Valero, C. Gardiner, K. Gärtner, R.  
1449 Gaudin, Y.S. Gho, B. Giebel, C. Gilbert, M. Gimona, I. Giusti, D.C.I. Goberdhan, A. Görgens,  
1450 S.M. Gorski, D.W. Greening, J.C. Gross, A. Gualerzi, G.N. Gupta, D. Gustafson, A. Handberg,  
1451 R.A. Haraszti, P. Harrison, H. Hegyesi, A. Hendrix, A.F. Hill, F.H. Hochberg, K.F. Hoffmann,  
1452 B. Holder, H. Holthofer, B. Hosseinkhani, G. Hu, Y. Huang, V. Huber, S. Hunt, A.G.-E.  
1453 Ibrahim, T. Ikezu, J.M. Inal, M. Isin, A. Ivanova, H.K. Jackson, S. Jacobsen, S.M. Jay, M.  
1454 Jayachandran, G. Jenster, L. Jiang, S.M. Johnson, J.C. Jones, A. Jong, T. Jovanovic-Talisman, S.  
1455 Jung, R. Kalluri, S.-i. Kano, S. Kaur, Y. Kawamura, E.T. Keller, D. Khamari, E. Khomyakova,  
1456 A. Khvorova, P. Kierulf, K.P. Kim, T. Kislinger, M. Klingeborn, D.J. Klinke, M. Kornek, M.M.  
1457 Kosanović, Á.F. Kovács, E.-M. Krämer-Albers, S. Krasemann, M. Krause, I.V. Kurochkin, G.D.  
1458 Kusuma, S. Kuypers, S. Laitinen, S.M. Langevin, L.R. Languino, J. Lannigan, C. Lässer, L.C.

1459 Laurent, G. Lavieu, E. Lázaro-Ibáñez, S. Le Lay, M.-S. Lee, Y.X.F. Lee, D.S. Lemos, M.  
1460 Lenassi, A. Leszczynska, I.T.S. Li, K. Liao, S.F. Libregts, E. Ligeti, R. Lim, S.K. Lim, A. Linē,  
1461 K. Linnemannstōns, A. Llorente, C.A. Lombard, M.J. Lorenowicz, Á.M. Lőrincz, J. Lōtvall, J.  
1462 Lovett, M.C. Lowry, X. Loyer, Q. Lu, B. Lukomska, T.R. Lunavat, S.L.N. Maas, H. Malhi, A.  
1463 Marcilla, J. Mariani, J. Mariscal, E.S. Martens-Uzunova, L. Martin-Jaular, M.C. Martinez, V.R.  
1464 Martins, M. Mathieu, S. Mathivanan, M. Maugeri, L.K. McGinnis, M.J. McVey, D.G. Meckes,  
1465 K.L. Meehan, I. Mertens, V.R. Minciocchi, A. Möller, M. Møller Jørgensen, A. Morales-  
1466 Kastresana, J. Morhayim, F. Mullier, M. Muraca, L. Musante, V. Mussack, D.C. Muth, K.H.  
1467 Myburgh, T. Najrana, M. Nawaz, I. Nazarenko, P. Nejsun, C. Neri, T. Neri, R. Nieuwland, L.  
1468 Nimrichter, J.P. Nolan, E.N.M. Nolte-'t Hoen, N. Noren Hooten, L. O'Driscoll, T. O'Grady, A.  
1469 O'Loghlen, T. Ochiya, M. Olivier, A. Ortiz, L.A. Ortiz, X. Osteikoetxea, O. Østergaard, M.  
1470 Ostrowski, J. Park, D.M. Pegtel, H. Peinado, F. Perut, M.W. Pfaffl, D.G. Phinney, B.C.H.  
1471 Pieters, R.C. Pink, D.S. Pisetsky, E. Pogge von Strandmann, I. Polakovicova, I.K.H. Poon, B.H.  
1472 Powell, I. Prada, L. Pulliam, P. Quesenberry, A. Radeghieri, R.L. Raffai, S. Raimondo, J. Rak,  
1473 M.I. Ramirez, G. Raposo, M.S. Rayyan, N. Regev-Rudzki, F.L. Ricklefs, P.D. Robbins, D.D.  
1474 Roberts, S.C. Rodrigues, E. Rohde, S. Rome, K.M.A. Rouschop, A. Ruggetti, A.E. Russell, P.  
1475 Saá, S. Sahoo, E. Salas-Huenuleo, C. Sánchez, J.A. Saugstad, M.J. Saul, R.M. Schiffelers, R.  
1476 Schneider, T.H. Schøyen, A. Scott, E. Shahaj, S. Sharma, O. Shatnyeva, F. Shekari, G.V. Shelke,  
1477 A.K. Shetty, K. Shiba, P.R.M. Siljander, A.M. Silva, A. Skowronek, O.L. Snyder, R.P. Soares,  
1478 B.W. Sódar, C. Soekmadji, J. Sotillo, P.D. Stahl, W. Stoorvogel, S.L. Stott, E.F. Strasser, S.  
1479 Swift, H. Tahara, M. Tewari, K. Timms, S. Tiwari, R. Tixeira, M. Tkach, W.S. Toh, R.  
1480 Tomasini, A.C. Torrecilhas, J.P. Tosar, V. Toxavidis, L. Urbanelli, P. Vader, B.W.M. van  
1481 Balkom, S.G. van der Grein, J. Van Deun, M.J.C. van Herwijnen, K. Van Keuren-Jensen, G. van  
1482 Niel, M.E. van Royen, A.J. van Wijnen, M.H. Vasconcelos, I.J. Vechetti, T.D. Veit, L.J. Vella,  
1483 É. Velot, F.J. Verweij, B. Vestad, J.L. Viñas, T. Visnovitz, K.V. Vukman, J. Wahlgren, D.C.  
1484 Watson, M.H.M. Wauben, A. Weaver, J.P. Webber, V. Weber, A.M. Wehman, D.J. Weiss, J.A.  
1485 Welsh, S. Wendt, A.M. Wheelock, Z. Wiener, L. Witte, J. Wolfram, A. Xagorari, P. Xander, J.  
1486 Xu, X. Yan, M. Yáñez-Mó, H. Yin, Y. Yuana, V. Zappulli, J. Zarubova, V. Žėkas, J.-y. Zhang,  
1487 Z. Zhao, L. Zheng, A.R. Zheutlin, A.M. Zickler, P. Zimmermann, A.M. Zivkovic, D. Zocco,  
1488 E.K. Zuba-Surma, Minimal information for studies of extracellular vesicles 2018 (MISEV2018):  
1489 a position statement of the International Society for Extracellular Vesicles and update of the  
1490 MISEV2014 guidelines, *Journal of Extracellular Vesicles* 7(1) (2018) 1535750.  
1491 [32] Invitrogen, Invitrogen Lipofectamine™ 3000 Reagent USER GUIDE,  
1492 [https://tools.thermofisher.com/content/sfs/manuals/lipofectamine3000\\_protocol.pdf](https://tools.thermofisher.com/content/sfs/manuals/lipofectamine3000_protocol.pdf),  
1493 ThermoFisher Scientific, 2016.  
1494 [33] K.M. Dave, L. Han, M.A. Jackson, L. Kadlecik, C.L. Duvall, S.M. D, DNA Polyplexes of a  
1495 Phosphorylcholine-Based Zwitterionic Polymer for Gene Delivery, *Pharm Res* 37(9) (2020) 176.  
1496 [34] A. Braganza, J. Li, X. Zeng, N.A. Yates, N.B. Dey, J. Andrews, J. Clark, L. Zamani, X.H.  
1497 Wang, C. St Croix, R. O'Sullivan, L. Garcia-Exposito, J.L. Brodsky, R.W. Sobol, UBE3B Is a  
1498 Calmodulin-regulated, Mitochondrion-associated E3 Ubiquitin Ligase, *J Biol Chem* 292(6)  
1499 (2017) 2470-2484.  
1500 [35] D.N. Perkins, D.J. Pappin, D.M. Creasy, J.S. Cottrell, Probability-based protein  
1501 identification by searching sequence databases using mass spectrometry data, *Electrophoresis*  
1502 20(18) (1999) 3551-67.

- 1503 [36] E.Y. Chen, C.M. Tan, Y. Kou, Q. Duan, Z. Wang, G.V. Meirelles, N.R. Clark, A. Ma'ayan,  
1504 Enrichr: interactive and collaborative HTML5 gene list enrichment analysis tool, *BMC*  
1505 *Bioinformatics* 14(1) (2013) 128.
- 1506 [37] The Gene Ontology resource: enriching a GOLD mine, *Nucleic Acids Res* 49(D1) (2021)  
1507 D325-d334.
- 1508 [38] M. Ashburner, C.A. Ball, J.A. Blake, D. Botstein, H. Butler, J.M. Cherry, A.P. Davis, K.  
1509 Dolinski, S.S. Dwight, J.T. Eppig, M.A. Harris, D.P. Hill, L. Issel-Tarver, A. Kasarskis, S.  
1510 Lewis, J.C. Matese, J.E. Richardson, M. Ringwald, G.M. Rubin, G. Sherlock, *Gene Ontology:*  
1511 *tool for the unification of biology*, *Nature Genetics* 25(1) (2000) 25-29.
- 1512 [39] R. Huang, I. Grishagin, Y. Wang, T. Zhao, J. Greene, J.C. Obenauer, D. Ngan, D.T.  
1513 Nguyen, R. Guha, A. Jadhav, N. Southall, A. Simeonov, C.P. Austin, *The NCATS BioPlanet -*  
1514 *An Integrated Platform for Exploring the Universe of Cellular Signaling Pathways for*  
1515 *Toxicology, Systems Biology, and Chemical Genomics*, *Front Pharmacol* 10 (2019) 445.
- 1516 [40] M. Kanehisa, M. Furumichi, Y. Sato, M. Ishiguro-Watanabe, M. Tanabe, *KEGG:*  
1517 *integrating viruses and cellular organisms*, *Nucleic Acids Research* 49(D1) (2020) D545-D551.
- 1518 [41] M. Kanehisa, *Toward understanding the origin and evolution of cellular organisms*, *Protein*  
1519 *Sci* 28(11) (2019) 1947-1951.
- 1520 [42] M. Kanehisa, S. Goto, *KEGG: kyoto encyclopedia of genes and genomes*, *Nucleic acids*  
1521 *research* 28(1) (2000) 27-30.
- 1522 [43] N. Cardenes, C. Corey, L. Geary, S. Jain, S. Zharikov, S. Barge, E.M. Novelli, S. Shiva,  
1523 *Platelet bioenergetic screen in sickle cell patients reveals mitochondrial complex V inhibition,*  
1524 *which contributes to platelet activation*, *Blood* 123(18) (2014) 2864-72.
- 1525 [44] J.E. Orfila, R.M. Dietz, K.M. Rodgers, A. Dingman, O.P. Patsos, I. Cruz-Torres, H. Grewal,  
1526 F. Strnad, C. Schroeder, P.S. Herson, *Experimental pediatric stroke shows age-specific recovery*  
1527 *of cognition and role of hippocampal Nogo-A receptor signaling*, *J Cereb Blood Flow Metab*  
1528 40(3) (2020) 588-599.
- 1529 [45] P.S. Herson, C.G. Bombardier, S.M. Parker, T. Shimizu, J. Klawitter, J. Klawitter, N.  
1530 Quillinan, J.L. Exo, N.A. Goldenberg, R.J. Traystman, *Experimental pediatric arterial ischemic*  
1531 *stroke model reveals sex-specific estrogen signaling*, *Stroke* 44(3) (2013) 759-63.
- 1532 [46] J.E. Orfila, H. Grewal, R.M. Dietz, F. Strnad, T. Shimizu, M. Moreno, C. Schroeder, J.  
1533 Yonchek, K.M. Rodgers, A. Dingman, T.J. Bernard, N. Quillinan, W.B. Macklin, R.J.  
1534 Traystman, P.S. Herson, *Delayed inhibition of tonic inhibition enhances functional recovery*  
1535 *following experimental ischemic stroke*, *J Cereb Blood Flow Metab* 39(6) (2019) 1005-1014.
- 1536 [47] X. Dai, J. Chen, F. Xu, J. Zhao, W. Cai, Z. Sun, T.K. Hitchens, L.M. Foley, R.K. Leak, J.  
1537 Chen, X. Hu, *TGF $\alpha$  preserves oligodendrocyte lineage cells and improves white matter integrity*  
1538 *after cerebral ischemia*, *J Cereb Blood Flow Metab* 40(3) (2020) 639-655.
- 1539 [48] W.H. Oldendorf, M.E. Cornford, W.J. Brown, *The large apparent work capability of the*  
1540 *blood-brain barrier: a study of the mitochondrial content of capillary endothelial cells in brain*  
1541 *and other tissues of the rat*, *Ann Neurol* 1(5) (1977) 409-17.
- 1542 [49] R. Parodi-Rullán, J.Y. Sone, S. Fossati, *Endothelial Mitochondrial Dysfunction in Cerebral*  
1543 *Amyloid Angiopathy and Alzheimer's Disease*, *J Alzheimers Dis* 72(4) (2019) 1019-1039.
- 1544 [50] E.H. Lo, M.A. Moskowitz, T.P. Jacobs, *Exciting, radical, suicidal: how brain cells die after*  
1545 *stroke*, *Stroke* 36(2) (2005) 189-92.
- 1546 [51] D.G. Meckes, Jr., N. Raab-Traub, *Microvesicles and viral infection*, *J Virol* 85(24) (2011)  
1547 12844-12854.

- 1548 [52] M.A. Antonyak, R.A. Cerione, Emerging picture of the distinct traits and functions of  
1549 microvesicles and exosomes, *Proceedings of the National Academy of Sciences* 112(12) (2015)  
1550 3589.
- 1551 [53] M.J. Haney, N.L. Klyachko, Y. Zhao, R. Gupta, E.G. Plotnikova, Z. He, T. Patel, A.  
1552 Piroyan, M. Sokolsky, A.V. Kabanov, E.V. Batrakova, Exosomes as drug delivery vehicles for  
1553 Parkinson's disease therapy, *Journal of controlled release : official journal of the Controlled*  
1554 *Release Society* 207 (2015) 18-30.
- 1555 [54] G. Midekessa, K. Godakumara, J. Ord, J. Viil, F. Lättekivi, K. Dissanayake, S. Kopanchuk,  
1556 A. Rincken, A. Andronowska, S. Bhattacharjee, T. Rincken, A. Fazeli, Zeta Potential of  
1557 Extracellular Vesicles: Toward Understanding the Attributes that Determine Colloidal Stability,  
1558 *ACS Omega* 5(27) (2020) 16701-16710.
- 1559 [55] A. Matsumoto, Y. Takahashi, M. Nishikawa, K. Sano, M. Morishita, C. Charoenviriyakul,  
1560 H. Saji, Y. Takakura, Role of Phosphatidylserine-Derived Negative Surface Charges in the  
1561 Recognition and Uptake of Intravenously Injected B16BL6-Derived Exosomes by Macrophages,  
1562 *Journal of Pharmaceutical Sciences* 106(1) (2017) 168-175.
- 1563 [56] J. Li, Y. Lee, H.J. Johansson, I. Mäger, P. Vader, J.Z. Nordin, O.P.B. Wiklander, J. Lehtiö,  
1564 M.J.A. Wood, S.E. Andaloussi, Serum-free culture alters the quantity and protein composition of  
1565 neuroblastoma-derived extracellular vesicles, *Journal of extracellular vesicles* 4 (2015) 26883-  
1566 26883.
- 1567 [57] C. Théry, M. Ostrowski, E. Segura, Membrane vesicles as conveyors of immune responses,  
1568 *Nature Reviews Immunology* 9(8) (2009) 581-593.
- 1569 [58] V. Muralidharan-Chari, J.W. Clancy, A. Sedgwick, C. Souza-Schorey, Microvesicles:  
1570 mediators of extracellular communication during cancer progression, *Journal of Cell Science*  
1571 123(10) (2010) 1603.
- 1572 [59] V. Dozio, J.-C. Sanchez, Characterisation of extracellular vesicle-subsets derived from brain  
1573 endothelial cells and analysis of their protein cargo modulation after TNF exposure, *Journal of*  
1574 *Extracellular Vesicles* 6(1) (2017) 1302705.
- 1575 [60] W.D. Gray, A.J. Mitchell, C.D. Searles, An accurate, precise method for general labeling of  
1576 extracellular vesicles, *MethodsX* 2 (2015) 360-7.
- 1577 [61] F. Kong, L. Zhang, H. Wang, G. Yuan, A. Guo, Q. Li, Z. Chen, Impact of collection,  
1578 isolation and storage methodology of circulating microvesicles on flow cytometric analysis, *Exp*  
1579 *Ther Med* 10(6) (2015) 2093-2101.
- 1580 [62] S.T.-Y. Chuo, J.C.-Y. Chien, C.P.-K. Lai, Imaging extracellular vesicles: current and  
1581 emerging methods, *J Biomed Sci* 25(1) (2018) 91-91.
- 1582 [63] D. Lucchetti, A. Battaglia, C. Ricciardi-Tenore, F. Colella, L. Perelli, R. De Maria, G.  
1583 Scambia, A. Sgambato, A. Fattorossi, Measuring Extracellular Vesicles by Conventional Flow  
1584 Cytometry: Dream or Reality?, *Int J Mol Sci* 21(17) (2020).
- 1585 [64] A. Jeyaram, S.M. Jay, Preservation and Storage Stability of Extracellular Vesicles for  
1586 Therapeutic Applications, *AAPS J* 20(1) (2017) 1-1.
- 1587 [65] Á.M. Lőrincz, C.I. Timár, K.A. Marosvári, D.S. Veres, L. Otrókoci, Á. Kittel, E. Ligeti,  
1588 Effect of storage on physical and functional properties of extracellular vesicles derived from  
1589 neutrophilic granulocytes, *Journal of extracellular vesicles* 3 (2014) 25465-25465.
- 1590 [66] T.A. Shtam, R.A. Kovalev, E.Y. Varfolomeeva, E.M. Makarov, Y.V. Kil, M.V. Filatov,  
1591 Exosomes are natural carriers of exogenous siRNA to human cells in vitro, *Cell Communication*  
1592 *and Signaling* 11(1) (2013) 88.

- 1593 [67] S.A.A. Kooijmans, S. Stremersch, K. Braeckmans, S.C. de Smedt, A. Hendrix, M.J.A.  
1594 Wood, R.M. Schiffelers, K. Raemdonck, P. Vader, Electroporation-induced siRNA precipitation  
1595 obscures the efficiency of siRNA loading into extracellular vesicles, *Journal of Controlled*  
1596 *Release* 172(1) (2013) 229-238.
- 1597 [68] W. Suh, S.-O. Han, L. Yu, S.W. Kim, An Angiogenic, Endothelial-Cell-Targeted Polymeric  
1598 Gene Carrier, *Molecular Therapy* 6(5) (2002) 664-672.
- 1599 [69] F.C. Tanner, D.P. Carr, G.J. Nabel, E.G. Nabel, Transfection of human endothelial cells,  
1600 *Cardiovascular Research* 35(3) (1997) 522-528.
- 1601 [70] A. Riches, E. Campbell, E. Borger, S. Powis, Regulation of exosome release from  
1602 mammary epithelial and breast cancer cells – A new regulatory pathway, *European Journal of*  
1603 *Cancer* 50(5) (2014) 1025-1034.
- 1604 [71] M.C. Cufaro, D. Pieragostino, P. Lanuti, C. Rossi, I. Cicalini, L. Federici, V. De Laurenzi,  
1605 P. Del Boccio, Extracellular Vesicles and Their Potential Use in Monitoring Cancer Progression  
1606 and Therapy: The Contribution of Proteomics, *J Oncol* 2019 (2019) 1639854-1639854.
- 1607 [72] B. György, T.G. Szabó, M. Pásztói, Z. Pál, P. Misják, B. Aradi, V. László, E. Pállinger, E.  
1608 Pap, A. Kittel, G. Nagy, A. Falus, E.I. Buzás, Membrane vesicles, current state-of-the-art:  
1609 emerging role of extracellular vesicles, *Cell Mol Life Sci* 68(16) (2011) 2667-2688.
- 1610 [73] J. Intra, A.K. Salem, Characterization of the transgene expression generated by branched  
1611 and linear polyethylenimine-plasmid DNA nanoparticles in vitro and after intraperitoneal  
1612 injection in vivo, *J Control Release* 130(2) (2008) 129-138.
- 1613 [74] D. Soundara Manickam, D. Oupicky, Polyplex gene delivery modulated by redox potential  
1614 gradients, *J Drug Target* 14(8) (2006) 519-26.
- 1615 [75] J.Y. Zhu, D.W. Zheng, M.K. Zhang, W.Y. Yu, W.X. Qiu, J.J. Hu, J. Feng, X.Z. Zhang,  
1616 Preferential Cancer Cell Self-Recognition and Tumor Self-Targeting by Coating Nanoparticles  
1617 with Homotypic Cancer Cell Membranes, *Nano Lett* 16(9) (2016) 5895-901.
- 1618 [76] E. Willms, C. Cabañas, I. Mäger, M.J.A. Wood, P. Vader, Extracellular Vesicle  
1619 Heterogeneity: Subpopulations, Isolation Techniques, and Diverse Functions in Cancer  
1620 Progression, *Front Immunol* 9 (2018) 738.
- 1621 [77] G.R. Willis, S. Kourembanas, S.A. Mitsialis, Toward Exosome-Based Therapeutics:  
1622 Isolation, Heterogeneity, and Fit-for-Purpose Potency, *Frontiers in Cardiovascular Medicine* 4  
1623 (2017) 63.
- 1624 [78] J. Palma, S.C. Yaddanapudi, L. Pigati, M.A. Havens, S. Jeong, G.A. Weiner, K.M. Weimer,  
1625 B. Stern, M.L. Hastings, D.M. Duelli, MicroRNAs are exported from malignant cells in  
1626 customized particles, *Nucleic Acids Res* 40(18) (2012) 9125-38.
- 1627 [79] T. Stegmann, J.Y. Legendre, Gene transfer mediated by cationic lipids: lack of a correlation  
1628 between lipid mixing and transfection, *Biochim Biophys Acta* 1325(1) (1997) 71-9.
- 1629 [80] T. Pisitkun, R.-F. Shen, M.A. Knepper, Identification and proteomic profiling of exosomes  
1630 in human urine, *Proceedings of the National Academy of Sciences of the United States of*  
1631 *America* 101(36) (2004) 13368.
- 1632 [81] H. Valadi, K. Ekström, A. Bossios, M. Sjöstrand, J.J. Lee, J.O. Lötvall, Exosome-mediated  
1633 transfer of mRNAs and microRNAs is a novel mechanism of genetic exchange between cells,  
1634 *Nat Cell Biol* 9(6) (2007) 654-9.
- 1635 [82] S. Mathivanan, R.J. Simpson, ExoCarta: A compendium of exosomal proteins and RNA,  
1636 *PROTEOMICS* 9(21) (2009) 4997-5000.
- 1637 [83] J.H. Jeon, C.W. Hong, E.Y. Kim, J.M. Lee, Current Understanding on the Metabolism of  
1638 Neutrophils, *Immune Netw* 20(6) (2020) e46.



- 1639 [84] V. Dozio, J.C. Sanchez, Characterisation of extracellular vesicle-subsets derived from brain  
1640 endothelial cells and analysis of their protein cargo modulation after TNF exposure, *J Extracell*  
1641 *Vesicles* 6(1) (2017) 1302705.
- 1642 [85] M. Bruschi, L. Santucci, S. Ravera, M. Bartolucci, A. Petretto, D. Calzia, G.M. Ghiggeri,  
1643 L.A. Ramenghi, G. Candiano, I. Panfoli, Metabolic Signature of Microvesicles from Umbilical  
1644 Cord Mesenchymal Stem Cells of Preterm and Term Infants, *Proteomics Clin Appl* 12(3) (2018)  
1645 e1700082.
- 1646 [86] P. Sansone, C. Savini, I. Kurelac, Q. Chang, L.B. Amato, A. Strillacci, A. Stepanova, L.  
1647 Iommarini, C. Mastroleo, L. Daly, A. Galkin, B.K. Thakur, N. Soplop, K. Uryu, A. Hoshino, L.  
1648 Norton, M. Bonafé, M. Cricca, G. Gasparre, D. Lyden, J. Bromberg, Packaging and transfer of  
1649 mitochondrial DNA via exosomes regulate escape from dormancy in hormonal therapy-resistant  
1650 breast cancer, *Proceedings of the National Academy of Sciences* 114(43) (2017) E9066.
- 1651 [87] A. Picca, F. Guerra, R. Calvani, F. Marini, A. Biancolillo, G. Landi, R. Beli, F. Landi, R.  
1652 Bernabei, A.R. Bentivoglio, M.R.L. Monaco, C. Bucci, E. Marzetti, Mitochondrial Signatures in  
1653 Circulating Extracellular Vesicles of Older Adults with Parkinson's Disease: Results from the  
1654 EXosomes in PARKinson's Disease (EXPAND) Study, *J Clin Med* 9(2) (2020) 504.
- 1655 [88] D. Jiang, F. Gao, Y. Zhang, D.S.H. Wong, Q. Li, H.-F. Tse, G. Xu, Z. Yu, Q. Lian,  
1656 Mitochondrial transfer of mesenchymal stem cells effectively protects corneal epithelial cells  
1657 from mitochondrial damage, *Cell Death Dis* 7(11) (2016) e2467-e2467.
- 1658 [89] N. Gebara, A. Rossi, R. Skovronova, J.M. Aziz, A. Asthana, B. Bussolati, Extracellular  
1659 Vesicles, Apoptotic Bodies and Mitochondria: Stem Cell Bioproducts for Organ Regeneration,  
1660 *Current Transplantation Reports* 7(2) (2020) 105-113.
- 1661 [90] K.A. Sinclair, S.T. Yerkovich, P.M.-A. Hopkins, D.C. Chambers, Characterization of  
1662 intercellular communication and mitochondrial donation by mesenchymal stromal cells derived  
1663 from the human lung, *Stem cell research & therapy* 7(1) (2016) 91-91.
- 1664 [91] S. Bruno, M. Tapparo, F. Collino, G. Chiabotto, M.C. Deregibus, R. Soares Lindoso, F.  
1665 Neri, S. Kholia, S. Giunti, S. Wen, P. Quesenberry, G. Camussi, Renal Regenerative Potential of  
1666 Different Extracellular Vesicle Populations Derived from Bone Marrow Mesenchymal Stromal  
1667 Cells, *Tissue Eng Part A* 23(21-22) (2017) 1262-1273.
- 1668 [92] E. Ragni, C. Perucca Orfei, P. De Luca, C. Mondadori, M. Viganò, A. Colombini, L. de  
1669 Girolamo, Inflammatory priming enhances mesenchymal stromal cell secretome potential as a  
1670 clinical product for regenerative medicine approaches through secreted factors and EV-miRNAs:  
1671 the example of joint disease, *Stem Cell Res Ther* 11(1) (2020) 165.
- 1672 [93] Y. Shi, X. Jiang, L. Zhang, H. Pu, X. Hu, W. Zhang, W. Cai, Y. Gao, R.K. Leak, R.F. Keep,  
1673 M.V.L. Bennett, J. Chen, Endothelium-targeted overexpression of heat shock protein 27  
1674 ameliorates blood-brain barrier disruption after ischemic brain injury, *Proceedings of the*  
1675 *National Academy of Sciences* 114(7) (2017) E1243.
- 1676 [94] R.K. Chaturvedi, M.F. Beal, Mitochondrial approaches for neuroprotection, *Ann N Y Acad*  
1677 *Sci* 1147 (2008) 395-412.
- 1678 [95] M.A. Moskowitz, E.H. Lo, C. Iadecola, The science of stroke: mechanisms in search of  
1679 treatments, *Neuron* 67(2) (2010) 181-198.
- 1680 [96] C. Cottet-Rousselle, X. Ronot, X. Leverve, J.F. Mayol, Cytometric assessment of  
1681 mitochondria using fluorescent probes, *Cytometry A* 79(6) (2011) 405-25.
- 1682 [97] N.E. Scharping, A.V. Menk, R.S. Moreci, R.D. Whetstone, R.E. Dadey, S.C. Watkins, R.L.  
1683 Ferris, G.M. Delgoffe, The Tumor Microenvironment Represses T Cell Mitochondrial

- 1684 Biogenesis to Drive Intratumoral T Cell Metabolic Insufficiency and Dysfunction, *Immunity*  
1685 45(2) (2016) 374-388.
- 1686 [98] R. Anne Stetler, R.K. Leak, Y. Gao, J. Chen, The dynamics of the mitochondrial organelle  
1687 as a potential therapeutic target, *J Cereb Blood Flow Metab* 33(1) (2013) 22-32.
- 1688 [99] I. Panfoli, S. Ravera, M. Podestà, C. Cossu, L. Santucci, M. Bartolucci, M. Bruschi, D.  
1689 Calzia, F. Sabatini, M. Bruschettoni, L.A. Ramenghi, O. Romantsik, D. Marimpietri, V. Pistoia,  
1690 G. Ghiggeri, F. Frassoni, G. Candiano, Exosomes from human mesenchymal stem cells conduct  
1691 aerobic metabolism in term and preterm newborn infants, *FASEB J* 30(4) (2016) 1416-24.
- 1692 [100] F. Puhm, T. Afonyushkin, U. Resch, G. Obermayer, M. Rohde, T. Penz, M. Schuster, G.  
1693 Wagner, F. Rendeiro Andre, I. Melki, C. Kaun, J. Wojta, C. Bock, B. Jilma, N. Mackman, E.  
1694 Boilard, J. Binder Christoph, Mitochondria Are a Subset of Extracellular Vesicles Released by  
1695 Activated Monocytes and Induce Type I IFN and TNF Responses in Endothelial Cells,  
1696 *Circulation Research* 125(1) (2019) 43-52.
- 1697 [101] X. Zhang, M.J. Hubal, V.B. Kraus, Immune cell extracellular vesicles and their  
1698 mitochondrial content decline with ageing, *Immunity & Ageing* 17(1) (2020) 1.
- 1699 [102] A. Braganza, G.K. Annarapu, S. Shiva, Blood-based bioenergetics: An emerging  
1700 translational and clinical tool, *Mol Aspects Med* 71 (2020) 100835.
- 1701 [103] D. Nolfi-Donagan, A. Braganza, S. Shiva, Mitochondrial electron transport chain:  
1702 Oxidative phosphorylation, oxidant production, and methods of measurement, *Redox Biol* 37  
1703 (2020) 101674.
- 1704 [104] V.N. Sure, S. Sakamuri, J.A. Sperling, W.R. Evans, I. Merdzo, R. Mostany, W.L. Murfee,  
1705 D.W. Busija, P.V.G. Katakam, A novel high-throughput assay for respiration in isolated brain  
1706 microvessels reveals impaired mitochondrial function in the aged mice, *Geroscience* 40(4)  
1707 (2018) 365-375.
- 1708 [105] A. Braganza, C.G. Corey, A.J. Santanasto, G. Distefano, P.M. Coen, N.W. Glynn, S.-M.  
1709 Nouraie, B.H. Goodpaster, A.B. Newman, S. Shiva, Platelet bioenergetics correlate with muscle  
1710 energetics and are altered in older adults, *JCI Insight* 5(13) (2019) e128248.
- 1711 [106] M. Guescini, D. Guidolin, L. Vallorani, L. Casadei, A.M. Gioacchini, P. Tibollo, M.  
1712 Battistelli, E. Falcieri, L. Battistin, L.F. Agnati, V. Stocchi, C2C12 myoblasts release micro-  
1713 vesicles containing mtDNA and proteins involved in signal transduction, *Exp Cell Res* 316(12)  
1714 (2010) 1977-84.
- 1715 [107] L. Balaj, R. Lessard, L. Dai, Y.-J. Cho, S.L. Pomeroy, X.O. Breakefield, J. Skog, Tumour  
1716 microvesicles contain retrotransposon elements and amplified oncogene sequences, *Nat*  
1717 *Commun* 2 (2011) 180-180.
- 1718 [108] J. Cai, Y. Han, H. Ren, C. Chen, D. He, L. Zhou, G.M. Eisner, L.D. Asico, P.A. Jose, C.  
1719 Zeng, Extracellular vesicle-mediated transfer of donor genomic DNA to recipient cells is a novel  
1720 mechanism for genetic influence between cells, *J Mol Cell Biol* 5(4) (2013) 227-238.
- 1721 [109] P. Wang, S.M. Henning, D. Heber, Limitations of MTT and MTS-based assays for  
1722 measurement of antiproliferative activity of green tea polyphenols, *PLoS One* 5(4) (2010)  
1723 e10202.
- 1724 [110] R.D. Petty, L.A. Sutherland, E.M. Hunter, I.A. Cree, Comparison of MTT and ATP-based  
1725 assays for the measurement of viable cell number, *J Biolumin Chemilumin* 10(1) (1995) 29-34.
- 1726 [111] J.M. Posimo, A.S. Unnithan, A.M. Gleixner, H.J. Choi, Y. Jiang, S.H. Pulugulla, R.K.  
1727 Leak, Viability assays for cells in culture, *J Vis Exp* (83) (2014) e50645-e50645.

- 1728 [112] T. Wolf, S.R. Baier, J. Zemleni, The Intestinal Transport of Bovine Milk Exosomes Is  
1729 Mediated by Endocytosis in Human Colon Carcinoma Caco-2 Cells and Rat Small Intestinal  
1730 IEC-6 Cells, *J Nutr* 145(10) (2015) 2201-2206.
- 1731 [113] M.S. Hansen, I.S.E. Gadegaard, E.C. Arnspang, K. Blans, L.N. Nejsum, J.T. Rasmussen,  
1732 Specific and Non-Invasive Fluorescent Labelling of Extracellular Vesicles for Evaluation of  
1733 Intracellular Processing by Intestinal Epithelial Cells, *Biomedicines* 8(7) (2020).
- 1734 [114] M.S. Joerger-Messerli, B. Oppliger, M. Spinelli, G. Thomi, I. di Salvo, P. Schneider, A.  
1735 Schoeberlein, Extracellular Vesicles Derived from Wharton's Jelly Mesenchymal Stem Cells  
1736 Prevent and Resolve Programmed Cell Death Mediated by Perinatal Hypoxia-Ischemia in  
1737 Neuronal Cells, *Cell Transplant* 27(1) (2018) 168-180.
- 1738 [115] L. Otero-Ortega, F. Laso-García, M.C.G.-d. Frutos, L. Diekhorst, A. Martínez-Arroyo, E.  
1739 Alonso-López, M.L. García-Bermejo, M. Rodríguez-Serrano, M. Arrúe-Gonzalo, E. Díez-  
1740 Tejedor, B. Fuentes, M. Gutiérrez-Fernández, Low dose of extracellular vesicles identified that  
1741 promote recovery after ischemic stroke, *Stem Cell Research & Therapy* 11(1) (2020) 70.
- 1742 [116] B.J. Jurgielewicz, Y. Yao, S.L. Stice, Kinetics and Specificity of HEK293T Extracellular  
1743 Vesicle Uptake using Imaging Flow Cytometry, *Nanoscale Research Letters* 15(1) (2020) 170.
- 1744 [117] H. Saari, E. Lázaro-Ibáñez, T. Viitala, E. Vuorimaa-Laukkanen, P. Siljander, M.  
1745 Yliperttula, Microvesicle- and exosome-mediated drug delivery enhances the cytotoxicity of  
1746 Paclitaxel in autologous prostate cancer cells, *Journal of Controlled Release* 220 (2015) 727-737.
- 1747 [118] B.S. Joshi, M.A. de Beer, B.N.G. Giepmans, I.S. Zuhorn, Endocytosis of Extracellular  
1748 Vesicles and Release of Their Cargo from Endosomes, *ACS Nano* 14(4) (2020) 4444-4455.
- 1749 [119] L.A. Mulcahy, R.C. Pink, D.R. Carter, Routes and mechanisms of extracellular vesicle  
1750 uptake, *J Extracell Vesicles* 3 (2014).
- 1751 [120] G. Morad, C.V. Carman, E.J. Hagedorn, J.R. Perlin, L.I. Zon, N. Mustafaoglu, T.-E. Park,  
1752 D.E. Ingber, C.C. Daisy, M.A. Moses, Tumor-Derived Extracellular Vesicles Breach the Intact  
1753 Blood-Brain Barrier via Transcytosis, *ACS Nano* 13(12) (2019) 13853-13865.
- 1754 [121] H. Costa Verdera, J.J. Gitz-Francois, R.M. Schiffelers, P. Vader, Cellular uptake of  
1755 extracellular vesicles is mediated by clathrin-independent endocytosis and macropinocytosis,  
1756 *Journal of Controlled Release* 266 (2017) 100-108.
- 1757 [122] U. Dirnagl, A. Meisel, Endogenous neuroprotection: mitochondria as gateways to cerebral  
1758 preconditioning?, *Neuropharmacology* 55(3) (2008) 334-44.
- 1759 [123] K. Hayakawa, S.J. Chan, E.T. Mandeville, J.H. Park, M. Bruzzese, J. Montaner, K. Arai,  
1760 A. Rosell, E.H. Lo, Protective Effects of Endothelial Progenitor Cell-Derived Extracellular  
1761 Mitochondria in Brain Endothelium, *Stem Cells* 36(9) (2018) 1404-1410.
- 1762 [124] M. Koulintchenko, R.J. Temperley, P.A. Mason, A. Dietrich, R.N. Lightowers, Natural  
1763 competence of mammalian mitochondria allows the molecular investigation of mitochondrial  
1764 gene expression, *Hum Mol Genet* 15(1) (2006) 143-54.
- 1765 [125] E.A. Amiot, J.A. Jaehning, Mitochondrial transcription is regulated via an ATP "sensing"  
1766 mechanism that couples RNA abundance to respiration, *Mol Cell* 22(3) (2006) 329-38.
- 1767 [126] A. Waldenström, N. Genneback, U. Hellman, G. Ronquist, Cardiomyocyte microvesicles  
1768 contain DNA/RNA and convey biological messages to target cells, *PLoS One* 7(4) (2012)  
1769 e34653.
- 1770 [127] E. Calabria, I. Scambi, R. Bonafede, L. Schiaffino, D. Peroni, V. Potrich, C. Capelli, F.  
1771 Schena, R. Mariotti, ASCs-Exosomes Recover Coupling Efficiency and Mitochondrial  
1772 Membrane Potential in an in vitro Model of ALS, *Front Neurosci* 13 (2019) 1070.

- 1773 [128] F. Arslan, R.C. Lai, M.B. Smeets, L. Akeroyd, A. Choo, E.N.E. Agnor, L. Timmers, H.V.  
1774 van Rijen, P.A. Doevendans, G. Pasterkamp, S.K. Lim, D.P. de Kleijn, Mesenchymal stem cell-  
1775 derived exosomes increase ATP levels, decrease oxidative stress and activate PI3K/Akt pathway  
1776 to enhance myocardial viability and prevent adverse remodeling after myocardial  
1777 ischemia/reperfusion injury, *Stem Cell Research* 10(3) (2013) 301-312.
- 1778 [129] K. Göran Ronquist, Extracellular vesicles and energy metabolism, *Clinica Chimica Acta*  
1779 488 (2019) 116-121.
- 1780 [130] G.J. del Zoppo, Stroke and neurovascular protection, *N Engl J Med* 354(6) (2006) 553-5.
- 1781 [131] G.J. del Zoppo, The neurovascular unit in the setting of stroke, *J Intern Med* 267(2) (2010)  
1782 156-71.
- 1783 [132] J.T. Ting, T.L. Daigle, Q. Chen, G. Feng, Acute brain slice methods for adult and aging  
1784 animals: application of targeted patch clamp analysis and optogenetics, *Methods Mol Biol* 1183  
1785 (2014) 221-42.
- 1786 [133] N. Tseng, S.C. Lambie, C.Q. Huynh, B. Sanford, M. Patel, P.S. Herson, D.R. Ormond,  
1787 Mitochondrial transfer from mesenchymal stem cells improves neuronal metabolism after  
1788 oxidant injury in vitro: The role of Miro1, *J Cereb Blood Flow Metab* 41(4) (2021) 761-770.
- 1789 [134] J. Goldberg, A. Currais, M. Prior, W. Fischer, C. Chiruta, E. Ratliff, L. Daugherty, R.  
1790 Dargusch, K. Finley, P.B. Esparza-Moltó, J.M. Cuezva, P. Maher, M. Petrascheck, D. Schubert,  
1791 The mitochondrial ATP synthase is a shared drug target for aging and dementia, *Aging Cell*  
1792 17(2) (2018) e12715.
- 1793 [135] C.E.J. Dieteren, S.C.A.M. Gielen, L.G.J. Nijtmans, J.A.M. Smeitink, H.G. Swarts, R.  
1794 Brock, P.H.G.M. Willems, W.J.H. Koopman, Solute diffusion is hindered in the mitochondrial  
1795 matrix, *Proceedings of the National Academy of Sciences* 108(21) (2011) 8657.
- 1796 [136] M. Xu, X. Bi, X. He, X. Yu, M. Zhao, W. Zang, Inhibition of the mitochondrial unfolded  
1797 protein response by acetylcholine alleviated hypoxia/reoxygenation-induced apoptosis of  
1798 endothelial cells, *Cell Cycle* 15(10) (2016) 1331-1343.
- 1799 [137] F. Puisieux, E. Fattal, M. Lahiani, J. Auger, P. Jouannet, P. Couvreur, J. Delattre,  
1800 Liposomes, an Interesting Tool to Deliver a Bioenergetic Substrate (ATP), in Vitro and in Vivo  
1801 Studies, *Journal of Drug Targeting* 2(5) (1994) 443-448.
- 1802 [138] F. Colleoni, N. Padmanabhan, H.-W. Yung, E.D. Watson, I. Cetin, M.C. Tissot van Patot,  
1803 G.J. Burton, A.J. Murray, Suppression of mitochondrial electron transport chain function in the  
1804 hypoxic human placenta: a role for miRNA-210 and protein synthesis inhibition, *PLoS One* 8(1)  
1805 (2013) e55194-e55194.
- 1806
